# Supplementary material
Source: publisher figshare collection journal article supplement (https://acs.figshare.com/ndownloader/files/3659082)

## Supporting Information

### **An Expeditious Synthesis of Sialic Acid Derivatives by Copper(I)-Catalyzed Stereodivergent Propargylation of Unprotected Aldoses**

Xiao-Feng Wei,<sup>1</sup> Yohei Shimizu,<sup>1,\*</sup> and Motomu Kanai<sup>1,2,\*</sup>

<sup>1</sup>Graduate School of Pharmaceutical Sciences, The University of Tokyo, Hongo, Bunkyo-ku, Tokyo 113-0033, Japan

<sup>2</sup>ERATO, Japan Science Technology Agency, Kanai Life Science Catalysis Project, Hongo, Bunkyo-ku, Tokyo 113-0033, Japan

#### **Table of Contents**

|                                                                                                |        |
|------------------------------------------------------------------------------------------------|--------|
| 1. General Information                                                                         | ...S2  |
| 2. Copper-Catalyzed Stereodivergent Propargylation of Aldoses                                  |        |
| 2-1. General procedure for the stereodivergent propargylation of aldoses (Condition A)         | ...S2  |
| 2-2. Optimization for the stereodivergent propargylation of 2-deoxy aldoses                    | ...S3  |
| 2-3. General procedure for the stereodivergent propargylation of 2-deoxy aldoses (Condition B) | ...S3  |
| 2-4. Gram-scale synthetic procedure for the stereodivergent propargylation of D-mannose        | ...S4  |
| 2-5. Effect of B(OMe) <sub>3</sub>                                                             | ...S4  |
| 2-6. Characterization of propargylation products                                               | ...S6  |
| 3. Rapid Synthesis of Sialic Acid Derivatives                                                  |        |
| 3-1. General procedure for sialic acid synthesis                                               | ...S16 |
| 3-2. Characterization of sialic acids                                                          | ...S16 |
| 4. NMR spectra                                                                                 | ...S21 |

## 1. General Information

NMR spectra were recorded on JEOL JNM-LA500 (500 MHz for  $^1\text{H}$  NMR and 125 MHz for  $^{13}\text{C}$  NMR), JEOL ECX500 (500 MHz for  $^1\text{H}$  NMR and 125 MHz for  $^{13}\text{C}$  NMR), and JEOL ECX400 (400 MHz for  $^1\text{H}$  NMR and 100 MHz for  $^{13}\text{C}$  NMR). Chemical shifts were reported in ppm on the  $\delta$  scale relative to residual  $\text{CHCl}_3$  ( $\delta = 7.26$  for  $^1\text{H}$  NMR and  $\delta = 77.0$  for  $^{13}\text{C}$  NMR),  $\text{CHD}_2\text{OD}$  ( $\delta = 3.31$  for  $^1\text{H}$  NMR and  $\delta = 49.0$  for  $^{13}\text{C}$  NMR), or HDO ( $\delta = 4.79$  for  $^1\text{H}$  NMR) as an internal reference. Infrared spectra (IR) were recorded on a JASCO FT/IR 410 Fourier transform infrared spectrophotometer. ESI-mass spectra were measured on a Waters ZQ4000 spectrometer (for LRMS) and a JEOL JMS-T100LC AccuTOF spectrometer (for HRMS). Preparative HPLC were conducted by using a JASCO HPLC system equipped with a UV-2075 spectrometer, PU-2086 pumps, a DG-2080-53 degasser, and an MX-2080-32 mixer. Reactions were carried out in dry solvents under argon atmosphere, unless otherwise stated. Reagents were purchased from Aldrich, Tokyo Chemical Industry Co., Ltd. (TCI), or Wako Pure Chemical Industries, Ltd., and used after purification by distillation or used without purification for solid substrates. Water for the HPLC analysis was purified using a Millipore MilliQ water purification system.

## 2. Copper-Catalyzed Stereodivergent Propargylation of Aldoses

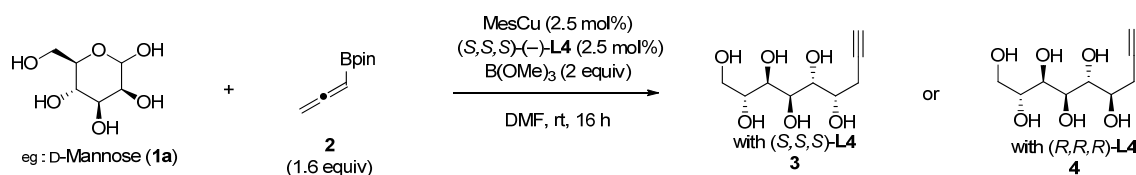

### 2-1. General procedure for the stereodivergent propargylation of aldoses (Condition A)

A flame-dried 20-mL test tube was charged with mesitylcopper (0.5 mg, 0.0027 mmol), (S,S,S)-Ph-SKP (1.7 mg, 0.0026 mmol), and D-mannose **1a** (18 mg, 0.10 mmol) under argon atmosphere.  $\text{B(OMe)}_3$  (22  $\mu\text{L}$ , 0.20 mmol) and dry DMF (125  $\mu\text{L}$ ) were then added to this mixture. The mixture was stirred for 10 min at room temperature. Allenylboronate **2** (29  $\mu\text{L}$ , 0.16 mmol) was added. After stirring for 16 h at room temperature, the reaction was quenched by the addition of MeOH and concentrated *in vacuo*. The process of MeOH addition followed by evaporation was repeated two-times to give a crude product. The diastereoselectivity was determined by  $^1\text{H}$  NMR analysis.

Products were purified by preparative reverse phase HPLC using a gradient of acetonitrile versus 0.1% TFA in water, affording **3a** as a white solid (19.8 mg, 90% yield). Preparative HPLC was carried out as follows: YMC-Triart C18 (20 mm I.D. × 250 mm) column using a linear gradient of 0-50% acetonitrile in 0.1% aqueous TFA over 30 min at room temperature with a flow rate of 7.0 mL min<sup>-1</sup>.

The configurations of **3a** and **3j** were determined after converting to KDN (**6a**) and Neu5Ac (**6j**), respectively. The NMR data of synthesized KDN (**6a**) and Neu5Ac (**6j**) were identical to the reported ones (KDN: Nakamura, M.; Furuhashi, K.; Yamasaki, T.; Ogura, H. *Chem. Pharm. Bull.* **1991**, 39 3140., Neu5Ac: Lorpitthaya, R.; Suryawanshi, S. B.; Wang, S.; Pasunooti, K. K.; Cai, S.; Ma, J.; Liu, X.-W. *Angew. Chem. Int. Ed.* **2011**, 50, 12054). The configurations of other products were tentatively assigned accordingly.

## 2-2. Optimization for the stereodivergent propargylation of 2-deoxy aldoses

The propargylation reaction between 2-deoxy-D-ribose (**1g**) and allenylboronate **2** was studied as a model reaction for 2-deoxy sugar substrates. Combinations of cationic copper salts and weak bases were examined to suppress protonolysis of allenylcopper species. A variety of mild bases, such as KOAc, PhCOONa, cesium pivalate, CF<sub>3</sub>SO<sub>3</sub>Na, and KOAc were examined, but the desired product was obtained only in trace amounts (Table S1, entries 2-6). Ultimately, CF<sub>3</sub>COOK was identified as the optimum base, providing the product in 65% yield with an 18:1 diastereoselectivity (entry 7).

Table S1

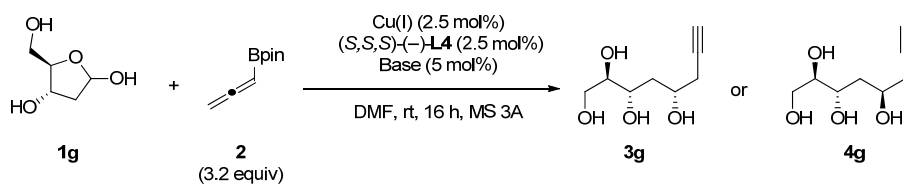

| Entry | Copper source                          | Base                               | Yield (%) <sup>a</sup> <b>3g</b> : <b>4g</b> <sup>b</sup> |          |
|-------|----------------------------------------|------------------------------------|-----------------------------------------------------------|----------|
| 1     | MesCu                                  | -                                  | 48                                                        | > 20 : 1 |
| 2     | CuClO <sub>4</sub> (MeCN) <sub>4</sub> | KOAc                               | trace                                                     | -        |
| 3     | CuClO <sub>4</sub> (MeCN) <sub>4</sub> | PhCOONa                            | trace                                                     | -        |
| 4     | CuClO <sub>4</sub> (MeCN) <sub>4</sub> | Cesium pivalate                    | trace                                                     | -        |
| 5     | CuClO <sub>4</sub> (MeCN) <sub>4</sub> | CF <sub>3</sub> SO <sub>3</sub> Na | trace                                                     | -        |
| 6     | CuClO <sub>4</sub> (MeCN) <sub>4</sub> | KOAc                               | trace                                                     | -        |
| 7     | CuClO <sub>4</sub> (MeCN) <sub>4</sub> | CF <sub>3</sub> COOK               | 65                                                        | 18 : 1   |

<sup>a</sup>Isolated yield. <sup>b</sup>Determined by <sup>1</sup>H NMR

## 2-3. General procedure for the stereodivergent propargylation of 2-deoxy aldoses (Condition B)

A flame-dried 20-mL test tube was charged with  $\text{CuClO}_4(\text{MeCN})_4$  (0.8 mg, 0.0025 mmol), (*S,S,S*)-Ph-SKP (1.7 mg, 0.0026 mmol),  $\text{CF}_3\text{COOK}$  (0.8 mg, 0.0053 mmol), MS 3A 40 mg and 2-deoxy-D-ribose (**1g**: 13.4 mg, 0.10 mmol) under argon atmosphere.  $\text{B}(\text{OMe})_3$  (22  $\mu\text{L}$ , 0.20 mmol) and dry DMF (125  $\mu\text{L}$ ) were then added to this mixture. The mixture was stirred at room temperature for 10 min. Allenylboronate **2** (58  $\mu\text{L}$ , 0.32 mmol) was added. After stirring for 16 h at room temperature, the reaction was quenched by the addition of MeOH and concentrated *in vacuo*. The process of MeOH addition followed by evaporation was repeated two-times to give a crude product. The diastereoselectivity was determined by  $^1\text{H}$  NMR analysis. Products were purified by preparative reverse phase HPLC using a gradient of acetonitrile versus 0.1% TFA in water, affording **3g** as a white solid (11.3 mg, 65% yield). Preparative HPLC was carried out as follows: YMC-Triart C18 (20 mm I.D  $\times$  250 mm) column using a linear gradient of 0-50% acetonitrile in 0.1% aqueous TFA over 30 min at room temperature with a flow rate of 7.0 mL min $^{-1}$ .

#### 2-4. Gram-scale synthetic procedure for the stereodivergent propargylation of D-mannose

A flame-dried 20-mL bottle was charged with mesitylcopper (3.7 mg, 0.02 mmol), (*S,S,S*)-Ph-SKP (13.2 mg, 0.02 mmol), and D-Mannose **1a** (1.8 g, 10 mmol) under argon atmosphere.  $\text{B}(\text{OMe})_3$  (2.2 mL, 20 mmol) and dry DMF (6.3 mL) were then added to this mixture. The mixture was stirred for 10 min at room temperature. Allenylboronate **2** (2.7 mL, 15 mmol) was added. After stirring for 16 h at room temperature, the reaction was quenched by the addition of MeOH and concentrated *in vacuo*. Addition of MeOH-concentration process was repeated two-times to give a crude product. The crude solid was washed successively with EtOAc and MeOH to provide **3a** as a white solid (1.91 g, 87% yield).

#### 2-5. Effect of $\text{B}(\text{OMe})_3$

The  $^1\text{H}$  NMR spectra in  $\text{DMSO}-d_6$  of a sample containing D-mannose and 2 equiv of  $\text{B}(\text{OMe})_3$  (Figure S1) indicates the existence of complicated complexation between mannose and  $\text{B}(\text{OMe})_3$ . The most notable difference between Figure S1 (mannose + 2 equiv of  $\text{B}(\text{OMe})_3$ ) and Figure S2 (mannose only) is the appearance of an aldehyde C-H proton (9.66 ppm) in Figure S1. The ratio of the aldehyde form to other species was determined to be 0.15% by  $^1\text{H}$  NMR analysis using MeCN as internal standard. Thus, the addition of  $\text{B}(\text{OMe})_3$  significantly increased the aldehyde form. Although the concentration of the aldehyde form was still low, this observation indicates that the

addition of  $\text{B(OMe)}_3$  facilitates the propargylation reaction by stabilizing the aldehyde form of aldoses (see Fig. 2 in the text).

**Figure S1.** Mannose + 2 equiv of  $\text{B(OMe)}_3$  + 1 equiv of MeCN

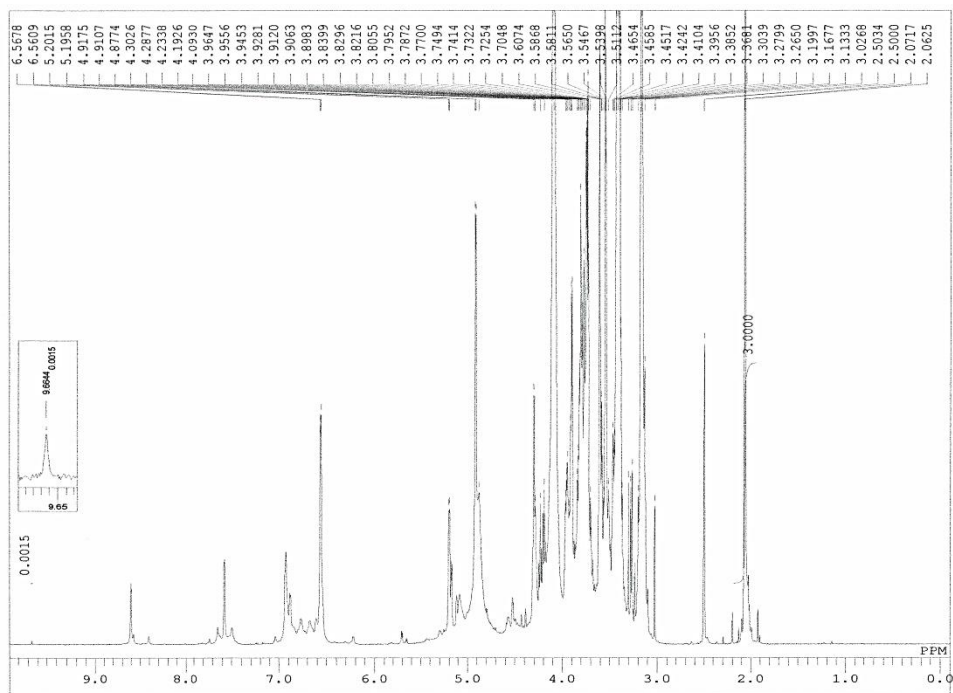

**Figure S2.** Mannose

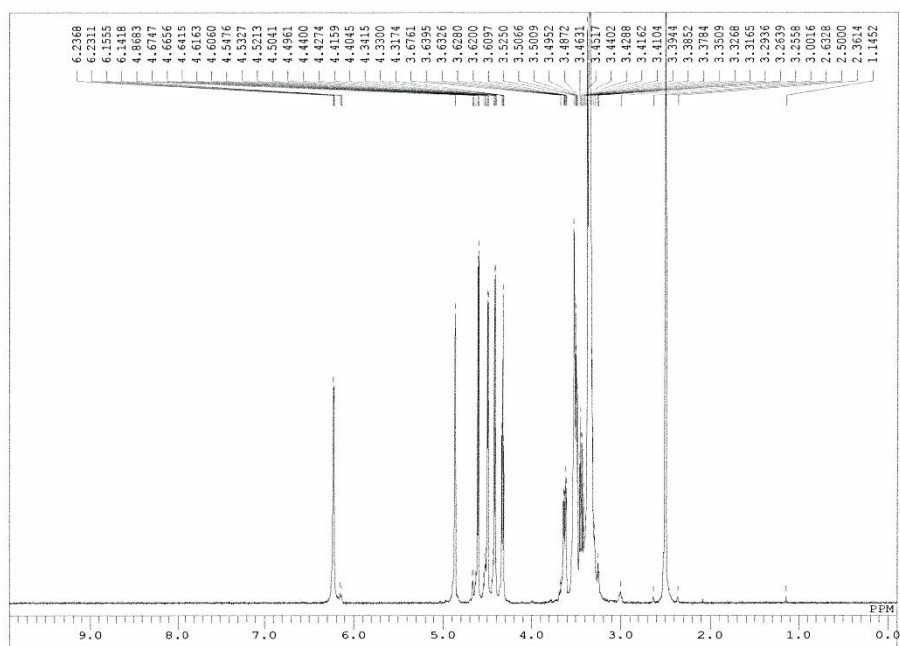

## 2-6. Characterization of propargylation products

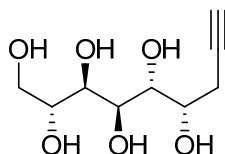

### (2*R*,3*R*,4*R*,5*R*,6*S*)-non-8-yne-1,2,3,4,5,6-hexaol (**3a**)

A white solid, Yield: 90%.  $^1\text{H}$  NMR (500 MHz,  $\text{D}_2\text{O}$ )  $\delta$  3.99 (t,  $J = 6.9$  Hz, 1H), 3.79 (d,  $J = 9.6$  Hz, 1H), 3.77-3.74 (m, 1H), 3.70 (d,  $J = 8.7$  Hz, 1H), 3.67-3.63 (m, 1H), 3.60 (d,  $J = 9.6$  Hz, 1H), 3.58-3.53 (m, 1H), 2.47-2.36 (m, 2H), 2.28 (t,  $J = 2.3$  Hz, 1H);  $^{13}\text{C}$  NMR (125 MHz,  $\text{D}_2\text{O}$ )  $\delta$  82.8, 71.8, 71.6, 70.1, 69.7, 68.5, 63.9, 23.6; IR (KBr): 3365, 3231, 1445, 1306, 1094, 1028, 849, 729  $\text{cm}^{-1}$ ; HRMS (ESI):  $m/z$  calcd for  $\text{C}_9\text{H}_{16}\text{O}_6$   $[\text{M}+\text{Na}]^+$  243.0840 Found 243.0842;  $[\alpha]_{\text{D}}^{23.2} = +0.2$  ( $c = 0.53$ ,  $\text{H}_2\text{O}$ ).

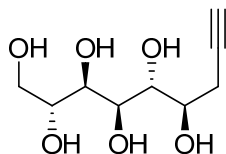

### (2*R*,3*R*,4*R*,5*R*,6*R*)-non-8-yne-1,2,3,4,5,6-hexaol (**4a**)

A white solid, Yield: 81%.  $^1\text{H}$  NMR (500 MHz,  $\text{D}_2\text{O}$ )  $\delta$  3.88 (dt,  $J = 8.6, 4.6$  Hz, 1H), 3.74-3.57 (m, 5H), 3.50 (dd,  $J = 11.7, 6.0$  Hz, 1H), 2.42 (dt,  $J = 17.2, 3.5$  Hz, 1H), 2.34 (ddd,  $J = 17.2, 8.0, 2.6$  Hz, 1H), 2.22 (t,  $J = 2.6$  Hz, 1H);  $^{13}\text{C}$  NMR (125 MHz,  $\text{D}_2\text{O}$ )  $\delta$  82.7, 72.8, 71.5, 71.4, 71.2, 70.5, 70.2, 63.9, 21.7; IR (KBr): 3375, 2962, 2896, 1423, 1392, 1088, 1035, 752, 634  $\text{cm}^{-1}$ ; HRMS (ESI):  $m/z$  calcd for  $\text{C}_9\text{H}_{16}\text{O}_6$   $[\text{M}+\text{Na}]^+$  243.0840 Found 243.0835;  $[\alpha]_{\text{D}}^{22.2} = +6.4$  ( $c = 0.50$ ,  $\text{H}_2\text{O}$ ).

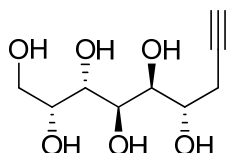

### (2*R*,3*S*,4*R*,5*S*,6*S*)-non-8-yne-1,2,3,4,5,6-hexaol (**3b**)

A white solid, Yield: 73%.  $^1\text{H}$  NMR (500 MHz,  $\text{D}_2\text{O}$ )  $\delta$  3.83 (t,  $J = 6.5$  Hz, 1H), 3.77 (d,  $J = 9.5$  Hz, 1H), 3.75-3.69 (m, 2H), 3.53 (d,  $J = 6.3$  Hz, 2H), 3.51 (d,  $J = 10.3$  Hz, 1H), 2.52 (dt,  $J = 17.4, 2.5$  Hz, 1H), 2.37 (ddd,  $J = 17.4, 5.4, 2.5$  Hz, 1H), 2.22 (t,  $J = 2.5$  Hz, 1H);  $^{13}\text{C}$  NMR (125 MHz,  $\text{CD}_3\text{OD}$ )  $\delta$  75.1, 72.0, 71.3, 69.7, 68.0, 64.9, 40.9, 28.7; IR

(KBr): 3297, 1422, 1112, 1086, 1033  $\text{cm}^{-1}$ ; HRMS (ESI):  $m/z$  calcd for  $\text{C}_9\text{H}_{16}\text{O}_6$   $[\text{M}+\text{Na}]^+$  243.0840 Found 243.0842;  $[\alpha]_{\text{D}}^{22.4} = +4.4$  ( $c = 0.50$ ,  $\text{H}_2\text{O}$ ).

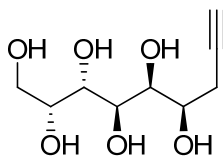

**(2R,3S,4R,5S,6R)-non-8-yne-1,2,3,4,5,6-hexaol (4b)**

A white solid, Yield: 66%.  $^1\text{H}$  NMR (500 MHz,  $\text{D}_2\text{O}$ )  $\delta$  3.80-3.73 (m, 3H), 3.60 (d,  $J = 9.2$  Hz, 1H), 3.54-3.49 (m, 3H), 2.44-2.40 (m, 1H), 2.34-2.28 (m, 1H), 2.22 (brs, 1H);  $^{13}\text{C}$  NMR (125 MHz,  $\text{CD}_3\text{OD}$ )  $\delta$  81.9, 73.6, 73.2, 71.7, 71.4, 71.2, 64.9, 24.3; IR (KBr): 3398, 2925, 1433, 1103, 1055, 680  $\text{cm}^{-1}$ ; HRMS (ESI):  $m/z$  calcd for  $\text{C}_9\text{H}_{16}\text{O}_6$   $[\text{M}+\text{Na}]^+$  243.0840 Found 243.0832;  $[\alpha]_{\text{D}}^{22.1} = +6.1$  ( $c = 0.35$ ,  $\text{H}_2\text{O}$ ).

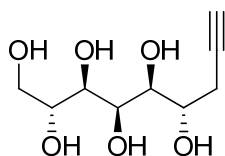

**(2R,3R,4R,5S,6S)-non-8-yne-1,2,3,4,5,6-hexaol (3c)**

A white solid, Yield: 76%.  $^1\text{H}$  NMR (500 MHz,  $\text{D}_2\text{O}$ )  $\delta$  3.86 (t,  $J = 2.9$  Hz, 1H), 3.74-3.70 (m, 1H), 3.66-3.57 (m, 4H), 3.49 (dd,  $J = 11.4$ , 5.9 Hz, 1H), 2.45 (dt,  $J = 17.3$ , 3.4 Hz, 1H), 2.36 (ddd,  $J = 17.3$ , 6.3, 2.3 Hz, 1H), 2.21 (t,  $J = 2.3$  Hz, 1H);  $^{13}\text{C}$  NMR (125 MHz,  $\text{D}_2\text{O}$ )  $\delta$  81.9, 74.6, 73.6, 71.8, 71.7, 69.2, 68.8, 63.1, 23.0; IR (KBr): 3280, 2918, 1427, 1096, 1028, 667  $\text{cm}^{-1}$ ; HRMS (ESI):  $m/z$  calcd for  $\text{C}_9\text{H}_{16}\text{O}_6$   $[\text{M}+\text{Na}]^+$  243.0840 Found 243.0835;  $[\alpha]_{\text{D}}^{22.9} = +2.0$  ( $c = 0.51$ ,  $\text{H}_2\text{O}$ ).

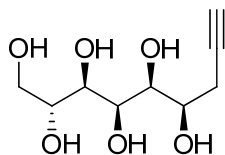

**(2R,3R,4R,5S,6R)-non-8-yne-1,2,3,4,5,6-hexaol (4c)**

A white solid, Yield: 72%. (inseparable mixture of **3c** and **4c**) For **4c**:  $^1\text{H}$  NMR (500 MHz,  $\text{D}_2\text{O}$ )  $\delta$  3.95 (dd,  $J = 5.7$ , 1.7 Hz, 1H), 3.89 (td,  $J = 6.9$ , 2.9 Hz, 1H), 3.80-3.60 (m, 5H), 2.52 (dd,  $J = 6.9$ , 2.9 Hz, 1H), 2.27 (t,  $J = 2.9$  Hz, 1H);  $^{13}\text{C}$  NMR (125 MHz,  $\text{D}_2\text{O}$ )  $\delta$  82.0, 74.7, 73.9, 71.8, 71.7, 70.6, 70.0, 63.5, 23.7; IR (KBr): 3387, 2925, 1675, 1204, 1076  $\text{cm}^{-1}$ ; HRMS (ESI):  $m/z$  calcd for  $\text{C}_9\text{H}_{16}\text{O}_6$   $[\text{M}+\text{Na}]^+$  243.0840 Found 243.0832.

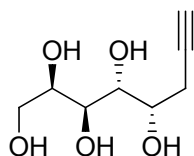

**(2*R*,3*S*,4*R*,5*S*)-oct-7-yn-1,2,3,4,5-pentaol (3d)**

A white solid, Yield: 84%.  $^1\text{H}$  NMR (500 MHz,  $\text{D}_2\text{O}$ )  $\delta$  4.00 (t,  $J = 7.1$  Hz, 1H), 4.89 (t,  $J = 6.4$  Hz, 1H), 3.65-3.56 (m, 4H), 2.47 (ddd,  $J = 16.9, 7.5, 2.6$  Hz, 1H), 2.40 (ddd,  $J = 16.9, 6.7, 2.6$  Hz, 1H), 2.32 (t,  $J = 2.6$  Hz, 1H);  $^{13}\text{C}$  NMR (125 MHz,  $\text{D}_2\text{O}$ )  $\delta$  82.6, 71.6, 71.2, 71.0, 70.2, 69.1, 63.9, 23.7; IR (KBr): 3388, 3217, 1452, 1389, 1294, 1231, 1105, 1052, 735, 657  $\text{cm}^{-1}$ ; HRMS (ESI):  $m/z$  calcd for  $\text{C}_8\text{H}_{14}\text{O}_5$   $[\text{M}+\text{Na}]^+$  213.0734 Found 213.0737;  $[\alpha]_{\text{D}}^{22.8} = +4.3$  ( $c = 0.15$ , MeOH).

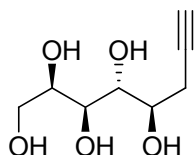

**(2*R*,3*S*,4*R*,5*R*)-oct-7-yn-1,2,3,4,5-pentaol (4d)**

A white solid, Yield: 81%.  $^1\text{H}$  NMR (500 MHz,  $\text{D}_2\text{O}$ )  $\delta$  3.87 (dt,  $J = 8.6, 4.5$  Hz, 1H), 3.80-3.77 (m, 1H), 3.66 (dd,  $J = 8.1, 5.1$  Hz, 1H), 3.53-3.48 (m, 3H), 2.41 (dt,  $J = 17.2, 2.9$  Hz, 1H), 2.33 (ddd,  $J = 17.2, 7.9, 2.9$  Hz, 1H), 2.21 (t,  $J = 2.9$  Hz, 1H);  $^{13}\text{C}$  NMR (125 MHz,  $\text{D}_2\text{O}$ )  $\delta$  82.6, 72.9, 71.6, 71.5, 71.2, 71.0, 63.7, 21.8; IR (KBr): 3326, 2952, 2900, 1458, 1411, 1222, 1095, 1048, 1030, 860, 695, 654  $\text{cm}^{-1}$ ; HRMS (ESI):  $m/z$  calcd for  $\text{C}_8\text{H}_{14}\text{O}_5$   $[\text{M}+\text{Na}]^+$  213.0734 Found 213.0731;  $[\alpha]_{\text{D}}^{20.8} = +9.4$  ( $c = 0.86$ ,  $\text{H}_2\text{O}$ ).

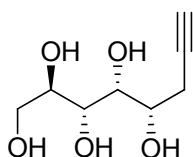

**(2*R*,3*S*,4*R*,5*S*)-oct-7-yn-1,2,3,4,5-pentaol (3e)**

A white solid, Yield: 95%.  $^1\text{H}$  NMR (500 MHz,  $\text{D}_2\text{O}$ )  $\delta$  3.76 (dd,  $J = 11.2, 6.2$  Hz, 1H), 3.71 (dd,  $J = 6.2, 2.0$  Hz, 1H), 3.67 (dd,  $J = 11.8, 2.9$  Hz, 1H), 3.63-3.60 (m, 1H), 3.51-3.47 (m, 2H), 2.40 (ddd,  $J = 17.4, 4.8, 2.3$  Hz, 1H), 2.30 (ddd,  $J = 17.4, 6.4, 2.3$  Hz, 1H), 2.22 (t,  $J = 2.3$  Hz, 1H);  $^{13}\text{C}$  NMR (125 MHz,  $\text{D}_2\text{O}$ )  $\delta$  81.7, 72.0, 71.9, 71.8, 71.7, 71.2, 63.5, 23.4; IR (KBr): 3430, 3285, 1434, 1089, 1042  $\text{cm}^{-1}$ ; HRMS (ESI):  $m/z$  calcd for  $\text{C}_8\text{H}_{14}\text{O}_5$   $[\text{M}+\text{Na}]^+$  213.0734 Found 213.0737;  $[\alpha]_{\text{D}}^{21.5} = -0.4$  ( $c = 0.52$ ,  $\text{H}_2\text{O}$ ).



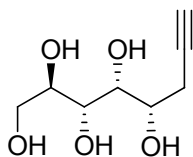

**(2*R*,3*S*,4*R*,5*R*)-oct-7-yn-1,2,3,4,5-pentaol (4e)**

A white solid, Yield: 93%.  $^1\text{H}$  NMR (500 MHz,  $\text{D}_2\text{O}$ )  $\delta$  3.72-3.64 (m, 4H), 3.60 (ddd,  $J$  = 8.8, 6.3, 2.8 Hz, 1H), 3.51 (dd,  $J$  = 11.9, 6.3 Hz, 1H), 2.51 (dt,  $J$  = 17.3, 2.6 Hz, 1H), 2.37 (ddd,  $J$  = 17.3, 5.6, 2.6 Hz, 1H), 2.22 (t,  $J$  = 2.6 Hz, 1H);  $^{13}\text{C}$  NMR (125 MHz,  $\text{D}_2\text{O}$ )  $\delta$  82.2, 71.9, 71.9, 71.5, 69.8, 68.9, 63.9, 23.9; IR (KBr): 3305, 2949, 1286, 1082, 1041, 644  $\text{cm}^{-1}$ ; HRMS (ESI):  $m/z$  calcd for  $\text{C}_8\text{H}_{14}\text{O}_5$   $[\text{M}+\text{Na}]^+$  213.0734 Found 213.0737;  $[\alpha]_{\text{D}}^{22.7} = -4.8$  ( $c$  = 0.48,  $\text{H}_2\text{O}$ ).

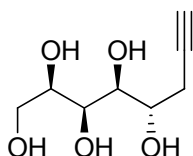

**(2*R*,3*S*,4*S*,5*S*)-oct-7-yn-1,2,3,4,5-pentaol (3f)**

A white solid, Yield: 65%.  $^1\text{H}$  NMR (400 MHz,  $\text{D}_2\text{O}$ )  $\delta$  3.75-3.64 (m, 3H), 3.60-3.57 (m, 1H), 3.52-3.43 (m, 2H), 2.49 (dt,  $J$  = 17.3, 2.3 Hz, 1H), 2.36 (ddd,  $J$  = 17.3, 6.0, 2.3 Hz, 1H), 2.22 (t,  $J$  = 2.3 Hz, 1H);  $^{13}\text{C}$  NMR (100 MHz,  $\text{D}_2\text{O}$ )  $\delta$  82.0, 73.7, 73.0, 72.0, 70.2, 69.0, 63.0, 23.4; IR (KBr): 3389, 2934, 1421, 1067, 657  $\text{cm}^{-1}$ ; HRMS (ESI):  $m/z$  calcd for  $\text{C}_8\text{H}_{14}\text{O}_5$   $[\text{M}+\text{Na}]^+$  213.0734 Found 213.0741;  $[\alpha]_{\text{D}}^{22.6} = +6.4$  ( $c$  = 0.91,  $\text{H}_2\text{O}$ ).

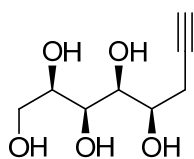

**(2*R*,3*S*,4*S*,5*R*)-oct-7-yn-1,2,3,4,5-pentaol (4f)**

A white solid, Yield: 60%.  $^1\text{H}$  NMR (500 MHz,  $\text{D}_2\text{O}$ )  $\delta$  3.81-3.79 (m, 1H), 3.70-3.67 (m, 1H), 3.61-3.55 (m, 3H), 3.51-3.47 (dd,  $J$  = 11.5, 6.9 Hz, 1H), 2.41-2.32 (m, 2H), 2.24 (m, 1H);  $^{13}\text{C}$  NMR (125 MHz,  $\text{D}_2\text{O}$ )  $\delta$  81.9, 73.2, 72.5, 71.9, 71.8, 70.4, 63.4, 23.5; IR (KBr): 3388, 1420, 1067, 669  $\text{cm}^{-1}$ ; HRMS (ESI):  $m/z$  calcd for  $\text{C}_8\text{H}_{14}\text{O}_5$   $[\text{M}+\text{Na}]^+$  213.0727 Found 213.0734;  $[\alpha]_{\text{D}}^{22.8} = +2.9$  ( $c$  = 0.68,  $\text{H}_2\text{O}$ ).

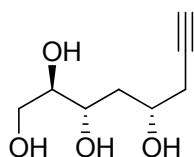

**(2R,3S,5S)-oct-7-yn-1,2,3,5-tetraol (3g)**

A white solid, Yield: 65%.  $^1\text{H}$  NMR (500 MHz,  $\text{CD}_3\text{OD}$ )  $\delta$  3.97 (dq,  $J = 8.1, 5.7$  Hz, 1H), 3.74-3.67 (m, 2H), 3.56 (dd,  $J = 11.3, 6.5$  Hz, 1H), 3.46 (dt,  $J = 6.3, 2.9$  Hz, 1H), 2.41-2.30 (m, 2H), 2.28 (t,  $J = 2.9$  Hz, 1H), 1.99 (ddd,  $J = 14.3, 4.6, 2.9$  Hz, 1H), 1.66-1.60 (dt,  $J = 14.3, 9.2$  Hz, 1H);  $^{13}\text{C}$  NMR (125 MHz,  $\text{CD}_3\text{OD}$ )  $\delta$  81.7, 76.3, 72.4, 71.4, 70.0, 64.4, 39.5, 27.8; IR (KBr): 3376, 2923, 1677, 1424, 1204, 1071, 651  $\text{cm}^{-1}$ ; HRMS (ESI):  $m/z$  calcd for  $\text{C}_8\text{H}_{14}\text{O}_4$   $[\text{M}+\text{Na}]^+$  197.0785 Found 197.0781;  $[\alpha]_{\text{D}}^{22.9} = -1.6$  ( $c = 0.57$ , MeOH).

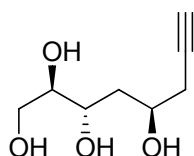

**(2R,3S,5R)-oct-7-yn-1,2,3,5-tetraol (4g)**

A white solid, Yield: 53%.  $^1\text{H}$  NMR (500 MHz,  $\text{CD}_3\text{OD}$ )  $\delta$  3.98 (dddd,  $J = 9.2, 6.3, 2.9$  Hz, 1H), 3.786 (ddd,  $J = 9.8, 6.3, 2.4$  Hz, 1H), 3.71 (dd,  $J = 11.2, 3.9$  Hz, 1H), 3.56 (dd,  $J = 11.2, 6.6$  Hz, 1H), 3.48 (dt,  $J = 6.6, 3.9$  Hz, 1H), 2.40 – 2.31 (m, 2H), 2.27 (t,  $J = 2.8$  Hz, 1H), 1.77 (ddd,  $J = 14.4, 9.8, 2.7$  Hz, 1H), 1.69 (ddd,  $J = 14.4, 9.8, 2.7$  Hz, 1H);  $^{13}\text{C}$  NMR (125 MHz,  $\text{CD}_3\text{OD}$ )  $\delta$  81.9, 76.6, 71.3, 70.2, 67.8, 64.7, 40.2, 28.7; IR (KBr): 3375, 2921, 1420, 1064, 652  $\text{cm}^{-1}$ ; HRMS (ESI):  $m/z$  calcd for  $\text{C}_8\text{H}_{14}\text{O}_4$   $[\text{M}+\text{Na}]^+$  197.0785 Found 197.0781;  $[\alpha]_{\text{D}}^{20.6} = -28.2$  ( $c = 0.64$ ,  $\text{H}_2\text{O}$ ).

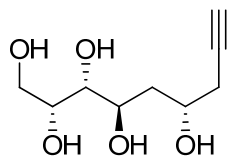

**(2R,3R,4R,6S)-non-8-yn-1,2,3,4,6-pentaol (3h)**

A white solid, Yield: 74%.  $^1\text{H}$  NMR (500 MHz,  $\text{CD}_3\text{OD}$ )  $\delta$  4.03-3.97 (m, 1H), 3.87 (ddd,  $J = 7.6, 6.7, 2.2$  Hz, 2H), 3.64-3.58 (m, 2H), 3.36 (dd,  $J = 7.6, 2.2$  Hz, 1H), 2.41-2.31 (m, 2H), 2.27 (t,  $J = 2.7$  Hz, 1H), 1.88 (ddd,  $J = 14.3, 9.8, 2.4$  Hz, 1H), 1.69 (ddd,  $J = 14.3, 9.8, 2.4$  Hz, 1H);  $^{13}\text{C}$  NMR (100 MHz,  $\text{D}_2\text{O}$ )  $\delta$  82.5, 74.4, 71.9, 71.2, 68.3, 66.8, 63.7, 39.2, 27.6; IR (KBr): 3280, 3192, 2952, 1466, 1422, 1065, 1030, 707

$\text{cm}^{-1}$ ; HRMS (ESI):  $m/z$  calcd for  $\text{C}_9\text{H}_{16}\text{O}_5$   $[\text{M}+\text{Na}]^+$  227.0890 Found 227.0887;  $[\alpha]_{\text{D}}^{22.8} = +23.8$  ( $c = 0.49$ ,  $\text{H}_2\text{O}$ ).

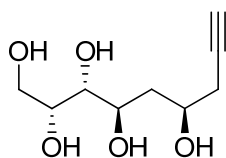

**(2R,3R,4R,6R)-non-8-yne-1,2,3,4,6-pentaol (4h)**

A white solid, Yield: 67%.  $^1\text{H}$  NMR (500 MHz,  $\text{CD}_3\text{OD}$ )  $\delta$  4.00 (dq,  $J = 8.0, 5.6$  Hz, 1H), 3.87-3.81 (m, 2H), 3.61 (d,  $J = 6.6$  Hz, 2H), 3.37 (dd,  $J = 7.5, 2.1$  Hz, 1H), 2.42-2.31 (m, 2H), 2.28 (t,  $J = 2.6$  Hz, 1H), 2.02 (ddd,  $J = 14.2, 4.7, 3.0$  Hz, 1H), 1.55 (ddd,  $J = 14.2, 9.1, 8.1$  Hz, 1H);  $^{13}\text{C}$  NMR (125 MHz,  $\text{CD}_3\text{OD}$ )  $\delta$  81.7, 84.6, 71.8, 71.7, 70.1, 64.8, 40.2, 27.9; IR (neat): 3375, 1422, 1069  $\text{cm}^{-1}$ ; HRMS (ESI):  $m/z$  calcd for  $\text{C}_9\text{H}_{16}\text{O}_5$   $[\text{M}+\text{Na}]^+$  227.0890 Found 227.0882,  $[\alpha]_{\text{D}}^{21.5} = +9.4$  ( $c = 0.53$ ,  $\text{H}_2\text{O}$ ).

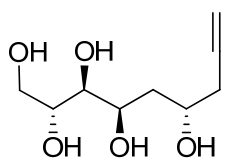

**(2R,3S,4R,6S)-non-8-yne-1,2,3,4,6-pentaol (3i)**

A white solid, Yield: 59%.  $^1\text{H}$  NMR (400 MHz,  $\text{CD}_3\text{OD}$ )  $\delta$  4.13-4.09 (m, 1H), 4.00-3.91 (m, 1H), 3.78 (dd,  $J = 10.9, 3.5$  Hz, 1H), 3.67 (ddd,  $J = 8.0, 5.9, 3.5$  Hz, 1H), 3.60 (dd,  $J = 10.9, 5.9$  Hz, 1H), 3.33 (s, 1H), 2.36 (dd,  $J = 6.2, 2.7$  Hz, 2H), 2.26 (t,  $J = 2.7$  Hz, 1H), 1.94 (ddd,  $J = 14.3, 10.4, 2.6$  Hz, 1H), 1.53 (ddd,  $J = 14.3, 9.8, 2.6$  Hz, 1H);  $^{13}\text{C}$  NMR (125 MHz,  $\text{CD}_3\text{OD}$ )  $\delta$  82.0, 75.5, 73.2, 71.3, 68.3, 68.0, 65.1, 41.2, 28.6; IR (neat): 3290, 1420, 1092, 1074, 1025  $\text{cm}^{-1}$ ; HRMS (ESI):  $m/z$  calcd for  $\text{C}_9\text{H}_{16}\text{O}_5$   $[\text{M}+\text{Na}]^+$  227.0890 Found 227.0900;  $[\alpha]_{\text{D}}^{23.8} = +31.9$  ( $c = 0.28$ ,  $\text{MeOH}$ ).

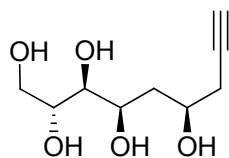

**(2R,3S,4R,6R)-non-8-yne-1,2,3,4,6-pentaol (4i)**

A white solid, Yield: 52%.  $^1\text{H}$  NMR (500 MHz,  $\text{CD}_3\text{OD}$ )  $\delta$  4.06 (dt,  $J = 7.4, 1.8$  Hz, 1H), 3.94 (dq,  $J = 11.0, 5.8$  Hz, 1H), 3.78 (dd,  $J = 11.0, 3.5$  Hz, 1H), 3.67 (ddd,  $J = 8.1, 6.0, 3.5$  Hz, 1H), 3.60 (dd,  $J = 8.1, 5.7$  Hz, 1H), 3.36 (dd,  $J = 10.4, 5.2$  Hz, 1H),

2.42-2.33 (m, 2H), 2.28 (t,  $J = 2.6$  Hz, 1H), 1.85-1.82 (m, 2H);  $^{13}\text{C}$  NMR (125 MHz,  $\text{CD}_3\text{OD}$ )  $\delta$  81.7, 74.5, 73.0, 71.4, 69.9, 69.5, 65.1, 40.3, 27.9; IR (KBr): 3280, 2918, 1432, 1089, 1033, 638  $\text{cm}^{-1}$ ; HRMS (ESI):  $m/z$  calcd for  $\text{C}_9\text{H}_{16}\text{O}_5$   $[\text{M}+\text{Na}]^+$  227.0890 Found 227.0900;  $[\alpha]_{\text{D}}^{22.4} = +6.5$  ( $c = 0.26$ ,  $\text{H}_2\text{O}$ ).

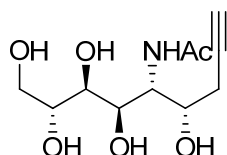

**N-((4*S*,5*R*,6*R*,7*S*,8*R*)-4,6,7,8,9-pentahydroxynon-1-yn-5-yl)acetamide (3j)**

A white solid, Yield: 70%.  $^1\text{H}$  NMR (500 MHz,  $\text{D}_2\text{O}$ )  $\delta$  4.13 (t,  $J = 6.9$  Hz, 1H), 3.94 (d,  $J = 10.4$  Hz, 1H), 3.78 (d,  $J = 10.4$  Hz, 1H), 3.68 (dd,  $J = 12.0, 2.9$  Hz, 1H), 3.61-3.57 (m, 1H), 3.47 (dd,  $J = 12.0, 6.3$  Hz, 1H), 3.31 (d,  $J = 9.2$  Hz, 1H), 2.26-2.22 (m, 3H), 1.89 (s, 3H);  $^{13}\text{C}$  NMR (125 MHz,  $\text{CD}_3\text{OD}$ )  $\delta$  174.8, 81.8, 72.4, 71.4, 71.2, 69.7, 68.7, 65.2, 54.7, 25.3, 22.6; IR (KBr): 3499, 3362, 1623, 1541, 1074  $\text{cm}^{-1}$ ; HRMS (ESI):  $m/z$  calcd for  $\text{C}_{11}\text{H}_{19}\text{NO}_6$   $[\text{M}+\text{Na}]^+$  284.1105 Found 284.1106;  $[\alpha]_{\text{D}}^{22.8} = -28.9$  ( $c = 0.67$ ,  $\text{H}_2\text{O}$ ).

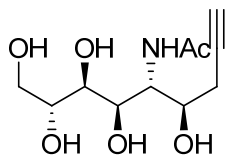

**N-((4*R*,5*R*,6*R*,7*S*,8*R*)-4,6,7,8,9-pentahydroxynon-1-yn-5-yl)acetamid (4j)**

A white solid, Yield: 51%.  $^1\text{H}$  NMR (500 MHz,  $\text{D}_2\text{O}$ )  $\delta$  4.10 (dd,  $J = 8.9, 5.7$  Hz, 1H), 3.98 (ddd,  $J = 7.7, 5.7, 4.3$  Hz, 1H), 3.84-3.82 (m, 1H), 3.67 (dd,  $J = 11.9, 2.8$  Hz, 1H), 3.57 (ddd,  $J = 9.1, 6.3, 2.8$  Hz, 1H), 3.46 (dd,  $J = 11.9, 6.3$  Hz, 1H), 3.38 (dd,  $J = 9.1, 0.8$  Hz, 1H), 2.41 (ddd,  $J = 17.0, 4.1, 2.6$  Hz, 1H), 2.30 (ddd,  $J = 17.0, 7.7, 2.6$  Hz, 1H), 2.24 (t,  $J = 2.6$  Hz, 1H), 1.87 (s, 3H);  $^{13}\text{C}$  NMR (125 MHz,  $\text{CD}_3\text{OD}$ )  $\delta$  174.9, 82.1, 71.7, 71.1, 70.2, 69.4, 63.7, 54.3, 22.7, 22.6; IR (neat): 3293, 1639, 1547, 1424, 1378, 1203, 1078, 1031  $\text{cm}^{-1}$ ; HRMS (ESI):  $m/z$  calcd for  $\text{C}_{11}\text{H}_{19}\text{NO}_6$   $[\text{M}+\text{Na}]^+$  284.1105 Found 284.1118;  $[\alpha]_{\text{D}}^{23.3} = -4.4$  ( $c = 0.84$ ,  $\text{MeOH}$ ).

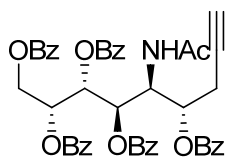

**(2R,3R,4R,5S,6S)-5-acetamidonon-8-yne-1,2,3,4,6-pentayl pentabenzoate (3k-Bz)**

A white solid, Yield: 55%.  $^1\text{H}$  NMR (500 MHz,  $\text{CDCl}_3$ )  $\delta$  8.10-8.09 (m, 2H), 7.95-7.93 (m, 2H), 7.86-7.84 (m, 4H), 7.70-7.69 (m, 2H), 7.68 (t,  $J = 7.5$  Hz, 1H), 7.50-7.43 (m, 5H), 7.37 (t,  $J = 7.5$  Hz, 1H), 7.33-7.26 (m, 7H), 7.10 (t,  $J = 7.5$  Hz, 2H), 6.12 (d,  $J = 6.9$  Hz, 1H), 6.05 (d,  $J = 9.8$  Hz, 1H), 5.86 (dd,  $J = 7.3, 2.0$  Hz, 2H), 5.20 (dd,  $J = 13.0, 6.3$  Hz, 1H), 5.11 (dd,  $J = 8.2, 6.3$  Hz, 1H), 4.67 (dd,  $J = 11.9, 4.4$  Hz, 1H), 4.48 (dd,  $J = 11.9, 6.9$  Hz, 1H), 2.75 (ddd,  $J = 17.0, 7.1, 2.6$  Hz, 1H), 2.68 (ddd,  $J = 17.0, 6.0, 2.6$  Hz, 1H), 2.01 (s, 3H), 1.93 (t,  $J = 2.6$  Hz, 1H);  $^{13}\text{C}$  NMR (125 MHz, acetone- $d_6$ )  $\delta$  170.4, 166.3, 166.1, 165.9, 165.8, 134.3, 134.2, 134.0, 133.9, 133.7, 131.0, 130.9, 130.9, 130.8, 130.7, 130.6, 130.5, 130.3, 130.2, 129.4, 129.3, 129.2, 129.1, 129.0, 79.8, 72.5, 72.0, 71.9, 71.0, 70.4, 69.5, 64.3, 50.5, 50.4, 22.9, 21.9; IR (neat): 3390, 1721, 1683, 1259, 1092, 1067, 708  $\text{cm}^{-1}$ ; HRMS (ESI):  $m/z$  calcd for  $\text{C}_{46}\text{H}_{39}\text{NO}_{11}$   $[\text{M}+\text{Na}]^+$  804.2416 Found 804.2399;  $[\alpha]_{\text{D}}^{22.9} = -13.9$  ( $c = 0.65$ , MeOH).

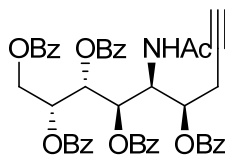

**(2R,3R,4R,5S,6R)-5-acetamidonon-8-yne-1,2,3,4,6-pentayl pentabenzoate (4k-Bz)**

A white solid, Yield: 40%.  $^1\text{H}$  NMR (500 MHz,  $\text{CDCl}_3$ )  $\delta$  8.10 (d,  $J = 7.4$  Hz, 2H), 7.95 (d,  $J = 7.4$  Hz, 2H), 7.86-7.80 (m, 6H), 7.56 (t,  $J = 7.4$  Hz, 1H), 7.49 (dd,  $J = 13.1, 7.4$  Hz, 2H), 7.42 (dd,  $J = 10.8, 4.4$  Hz, 4H), 7.32-7.24 (m, 8H), 5.93-5.89 (m, 4H), 5.26 (dd,  $J = 11.3, 5.6$  Hz, 1H), 5.16 (dd,  $J = 9.8, 6.3$  Hz, 1H), 4.73 (dd,  $J = 11.9, 4.3$  Hz, 1H), 4.48 (dd,  $J = 11.9, 7.4$  Hz, 1H), 2.75 (ddd,  $J = 17.3, 5.0, 2.6$  Hz, 1H), 2.64 (ddd,  $J = 17.3, 5.7, 2.6$  Hz, 1H), 1.92 (t,  $J = 2.6$  Hz, 1H), 1.90 (s, 3H);  $^{13}\text{C}$  NMR (125 MHz, acetone- $d_6$ )  $\delta$  170.9, 166.3, 166.1, 166.0, 165.9, 134.2, 134.1, 134.0, 133.9, 133.8, 130.9, 130.8, 130.6, 130.5, 130.4, 130.3, 130.2, 130.1, 129.3, 129.2, 129.1, 129.0, 79.6, 73.2, 72.8, 71.4, 70.9, 70.2, 64.5, 50.4, 22.8, 22.3; IR (neat): 3376, 1719, 1683, 1246, 1092, 1067, 708  $\text{cm}^{-1}$ ; HRMS (ESI):  $m/z$  calcd for  $\text{C}_{46}\text{H}_{39}\text{NO}_{11}$   $[\text{M}+\text{Na}]^+$  804.2416 Found 804.2399;  $[\alpha]_{\text{D}}^{22.8} = -17.4$  ( $c = 0.45$ , MeOH).

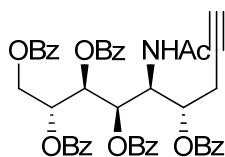

**(2*R*,3*S*,4*R*,5*S*,6*S*)-5-acetamidonon-8-yne-1,2,3,4,6-pentayl pentabenzoate (3l-Bz)**

A white solid, Yield: 45%.  $^1\text{H}$  NMR (500 MHz,  $\text{CDCl}_3$ )  $\delta$  8.05-7.99 (m, 4H), 7.847.82 (m, 2H), 7.73 (dd,  $J = 8.1, 7.5$  Hz, 4H), 7.54 (dt,  $J = 7.5, 1.0$  Hz, 2H), 7.45-7.35 (m, 8H), 7.26-7.17 (m, 5H), 5.99-5.92 (m, 2H), 5.85 (dt,  $J = 5.9, 3.0$  Hz, 1H), 5.23 (dd,  $J = 13.2, 6.3$  Hz, 1H), 5.16 (dd,  $J = 7.3, 1.8$  Hz, 1H), 4.87 (dd,  $J = 12.3, 3.0$  Hz, 1H), 4.59 (dd,  $J = 12.3, 5.9$  Hz, 1H), 2.72 (ddd,  $J = 17.2, 6.4, 2.7$  Hz, 1H), 2.65 (ddd,  $J = 17.2, 5.9, 2.7$  Hz, 1H), 2.11 (s, 3H), 1.86 (t,  $J = 2.7$  Hz, 1H);  $^{13}\text{C}$  NMR (125 MHz, acetone- $d_6$ )  $\delta$  171.1, 166.5, 166.1, 165.8, 165.7, 134.2, 134.1, 134.1, 134.0, 133.9, 130.8, 130.7, 130.6, 130.6, 130.5, 130.4, 130.4, 130.2, 129.4, 129.4, 129.3, 129.2, 129.2, 129.0, 79.8, 72.4, 72.0, 71.3, 71.2, 70.4, 63.2, , 51.9, 51.8, 23.0, 22.2; IR (neat): 3418, 1717, 1653, 1261, 1093, 709  $\text{cm}^{-1}$ ; HRMS (ESI):  $m/z$  calcd for  $\text{C}_{46}\text{H}_{39}\text{NO}_{11}$   $[\text{M}+\text{Na}]^+$  804.2416 Found 804.2399;  $[\alpha]_{\text{D}}^{22.8} = +12.6$  ( $c = 0.44$ , MeOH).

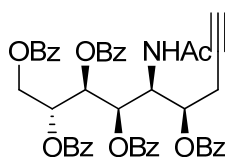

**(2*R*,3*S*,4*R*,5*S*,6*R*)-5-acetamidonon-8-yne-1,2,3,4,6-pentayl pentabenzoate (4l-Bz)**

A white solid, Yield: 51%.  $^1\text{H}$  NMR (500 MHz,  $\text{CDCl}_3$ )  $\delta$  8.11-8.07 (m, 2H), 8.07-8.03 (m, 2H), 8.03-7.99 (m, 2H), 7.92-7.88 (m, 2H), 7.84 (d,  $J = 8.2$  Hz, 2H), 7.58 (dd,  $J = 15.3, 7.5$  Hz, 2H), 7.53 (dd,  $J = 13.0, 6.9$  Hz, 2H), 7.44-7.33 (m, 10H), 7.19 (t,  $J = 7.7$  Hz, 2H), 6.33 (dd,  $J = 8.2, 3.1$  Hz, 1H), 5.81-5.72 (m, 4H), 5.01-4.95 (m, 1H), 4.79 (dd,  $J = 12.4, 2.7$  Hz, 1H), 4.49 (dd,  $J = 12.4, 5.0$  Hz, 1H), 2.67-2.56 (m, 2H), 1.78 (s, 3H), 1.70 (t,  $J = 2.1$  Hz, 1H);  $^{13}\text{C}$  NMR (125 MHz, acetone- $d_6$ )  $\delta$  170.9, 166.5, 166.5, 166.4, 166.3, 134.5, 134.2, 134.2, 134.0, 133.9, 130.8, 130.8, 130.7, 130.6, 130.6, 130.5, 130.3, 130.3, 130.2, 129.5, 129.3, 129.2, 129.2, 100.8, 79.7, 72.3, 72.1, 71.8, 70.6, 63.1, 51.5, 22.7, 22.5; IR (neat): 3384, 1711, 1674, 1241, 1090, 1066, 1024, 706  $\text{cm}^{-1}$ ; HRMS (ESI):  $m/z$  calcd for  $\text{C}_{46}\text{H}_{39}\text{NO}_{11}$   $[\text{M}+\text{Na}]^+$  804.2416 Found 804.2399;  $[\alpha]_{\text{D}}^{23.1} = +19.8$  ( $c = 1.17$ , MeOH).

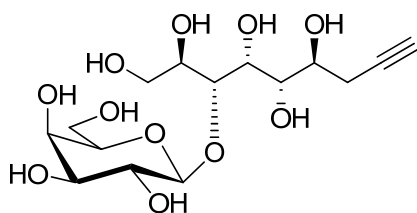

**(2*R*,3*R*,4*R*,5*S*,6*S*)-3-(((2*S*,3*R*,4*S*,5*R*,6*R*)-3,4,5-trihydroxy-6-(hydroxymethyl)tetrahydro-2*H*-pyran-2-yl)oxy)non-8-yne-1,2,4,5,6-pentaol (3m)**

A white solid, Yield: 56%.  $^1\text{H}$  NMR (500 MHz,  $\text{D}_2\text{O}$ )  $\delta$  4.39 (d,  $J = 8.0$  Hz, 1H), 3.93 (s, 1H), 3.78-3.38 (m, 12H), 2.45 (dt,  $J = 17.3, 2.5$  Hz, 1H), 2.35 (ddd,  $J = 17.3, 6.1, 2.5$  Hz, 1H), 2.23 (t,  $J = 2.5$  Hz, 1H);  $^{13}\text{C}$  NMR (125 MHz,  $\text{D}_2\text{O}$ )  $\delta$  104.1, 82.2, 82.1, 75.9, 73.7, 73.2, 72.1, 71.9, 71.8, 69.3, 69.1, 68.9, 62.7, 61.7, 23.1; IR (neat): 3398, 1642, 1424, 1074  $\text{cm}^{-1}$ ; HRMS (ESI):  $m/z$  calcd for  $\text{C}_{15}\text{H}_{26}\text{O}_{11}$   $[\text{M}+\text{Na}]^+$  405.1368 Found 405.1367;  $[\alpha]_{\text{D}}^{23.0} = +7.4$  ( $c = 0.87$ ,  $\text{H}_2\text{O}$ ).

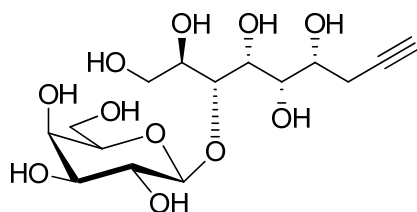

**(2*R*,3*R*,4*R*,5*S*,6*R*)-3-(((2*S*,3*R*,4*S*,5*R*,6*R*)-3,4,5-trihydroxy-6-(hydroxymethyl)tetrahydro-2*H*-pyran-2-yl)oxy)non-8-yne-1,2,4,5,6-pentaol (4m)**

A white solid, Yield: 45%.  $^1\text{H}$  NMR (500 MHz,  $\text{D}_2\text{O}$ )  $\delta$  4.34 (d,  $J = 7.5$  Hz, 1H), 3.90-3.87 (m, 1H), 3.81-3.47 (m, 11H), 3.38-3.35 (m, 1H), 2.38 (ddd,  $J = 9.4, 7.4, 2.5$  Hz, 1H), 2.33-2.26 (m, 1H), 2.23 (t,  $J = 2.0$  Hz, 1H).  $^{13}\text{C}$  NMR (125 MHz,  $\text{D}_2\text{O}$ )  $\delta$  103.7, 82.5, 79.8, 75.6, 73.5, 73.2, 71.9, 71.8, 71.7, 70.6, 70.0, 69.2, 62.7, 61.5, 23.8; IR (neat): 3409, 1643, 1423, 1075  $\text{cm}^{-1}$ ; HRMS (ESI):  $m/z$  calcd for  $\text{C}_{15}\text{H}_{26}\text{O}_{11}$   $[\text{M}+\text{Na}]^+$  405.1368 Found 405.1367;  $[\alpha]_{\text{D}}^{23.1} = +6.7$  ( $c = 1.09$ ,  $\text{H}_2\text{O}$ ).

### 3. Rapid Synthesis of Sialic Acid Derivatives

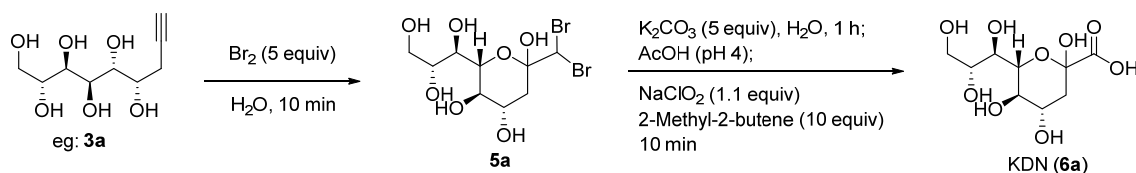

#### 3-1. General procedure for sialic acid synthesis

##### 3-Deoxy-D-glycero- $\beta$ -D-galacto-2-nonulosonic acid (**6a**)

To a 100 mL round bottom flask containing compound **3a** (1.1 g, 5 mmol) in 22.5 mL H<sub>2</sub>O was added Br<sub>2</sub> (2.0 g, 25 mmol). The resulting reaction mixture was stirred for 10 min at room temperature to afford **5a**. Excess amounts of bromine were removed *via* extraction with hexane (30 mL, 3 times). The aqueous solution containing the product was used directly into the next step without purification.

To a solution of **5a** in H<sub>2</sub>O (22.5 mL) was added K<sub>2</sub>CO<sub>3</sub> (3.46 g, 25 mmol). The mixture was stirred for 1 h at room temperature until TLC analysis indicated completion of the reaction. Subsequently, CH<sub>3</sub>COOH was added to the reaction mixture until pH = 4. To the mixture were added *t*BuOH (22.5 mL) and 2-methyl-2-butene (5.3 mL, 50 mmol). NaClO<sub>2</sub> (497 mg, 5.5 mmol) dissolved in 5 mL water was added dropwise, and the mixture was stirred for 10 min at room temperature. The solvent was evaporated, and the resulting crude residue was passed through a Dowex 1X8 resin (formate form) using aqueous formic acid solution (0-1 M) as an eluent. The solvent was removed *via* lyophilization to afford **6a** as white powder (1.02 g, 76% yield).

#### 3-2. Characterization of sialic acids

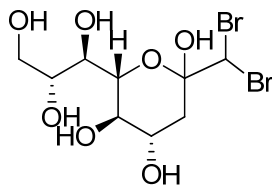

##### (4*S*,5*R*,6*R*)-2-(dibromomethyl)-6-((1*R*,2*R*)-1,2,3-trihydroxypropyl)tetrahydro-2*H*-pyran-2,4,5-triol (**5a**)

<sup>1</sup>H NMR (500 MHz, D<sub>2</sub>O)  $\delta$  5.81 (s, 1H), 3.90-3.85 (m, 2H), 3.81 (d, *J* = 9.8 Hz, 2H), 3.70-3.68 (m, 1H), 3.63 (dd, *J* = 10.9, 5.7 Hz, 1H), 3.44 (t, *J* = 9.75 Hz, 1H), 2.42 (dd, *J* = 12.6, 5.2 Hz, 1H) 1.59 (t, *J* = 12.6 Hz, 1H); <sup>13</sup>C NMR (125 MHz, CD<sub>3</sub>OD)  $\delta$  97.9, 73.7, 72.3, 71.8, 71.0, 69.9, 65.0, 53.9, 39.5; IR (KBr): 3376, 1655, 1420, 1066, 1034;



HRMS (ESI):  $m/z$  calcd for  $C_9H_{16}Br_2O_7$   $[M+Na]^+$  418.9135 Found 418.9146;  $[\alpha]_D^{23.5} = -12.7$  ( $c = 0.49$ , MeOH).

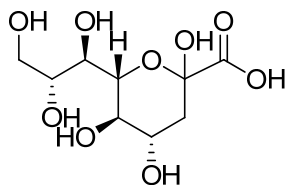

#### KDN (6a)

$^1H$  NMR (500 MHz,  $D_2O$ )  $\delta$  3.93-3.88 (m, 2H), 3.79-3.75 (m, 2H), 3.67-3.64 (m, 1H), 3.57 (dd,  $J = 12.0, 6.3$  Hz, 1H), 3.49 (t,  $J = 9.8$  Hz, 1H), 2.18 (dd,  $J = 13.2, 4.6$  Hz, 1H), 1.74 (t,  $J = 13.2$  Hz, 1H);  $^{13}C$  NMR (125 MHz,  $D_2O$ )  $\delta$  173.9, 95.9, 72.4, 71.1, 70.7, 69.3, 68.5, 63.9, 39.2; IR (KBr): 3399, 1743, 1440, 1281, 1210, 691  $cm^{-1}$  HRMS (ESI):  $m/z$  calcd for  $C_9H_{16}O_9$   $[M-H]^-$  267.0721 Found 267.0721.  $[\alpha]_D^{25} = -42$  ( $c = 1$ ,  $H_2O$ ).

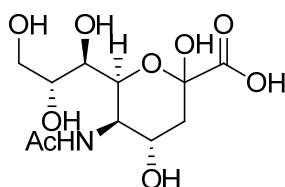

#### Neu5Ac (6j)

The reaction was conducted by following the general procedure, using **3j** (26.1 mg, 0.1 mmol),  $Br_2$  (40 mg, 0.5 mmol) in  $H_2O$  (0.5 mL). The reaction mixture was stirred at room temperature for 5 min. Excess amounts of bromine were removed *via* extraction with hexane. The aqueous solution containing the product was used directly into the next step.  $K_2CO_3$  (69.1 mg, 0.5 mmol) was added to the aqueous solution (0.5 mL) containing the crude product. The reaction was stirred for 30 min. Then  $CH_3COOH$  was added dropwise until  $pH = 4$ , and Pinnick oxidation using  $NaClO_2$  (9.9 mg, 0.11 mmol),  $tBuOH$  (0.5 mL), and 2-methyl-2-butene (0.11 mL, 1 mmol) was carried out in one pot. The solution was evaporated, and the resulting crude residue was passed through a Dowex 1X8 resin (formate form) using aqueous formic acid solution (0-1 M) as an eluent. The solvent was removed *via* lyophilization to afford **6j** as white powder (22.9 mg, 74% yield).

$^1H$  NMR (500 MHz,  $D_2O$ )  $\delta$  3.94-3.86 (m, 2H), 3.77 (t,  $J = 10.2$  Hz, 1H), 3.69 (dd,  $J = 11.9, 2.6$  Hz, 1H), 3.60 (ddd,  $J = 9.1, 6.4, 2.6$  Hz, 1H), 3.46 (dd,  $J = 11.9, 6.4$  Hz, 1H), 3.38 (dd,  $J = 9.1, 0.7$  Hz, 1H), 2.11 (dd,  $J = 13.0, 4.9$  Hz, 1H), 1.89 (s, 3H), 1.70 (dd,  $J = 13.0, 11.6$  Hz, 1H);  $^{13}C$  NMR (125 MHz,  $D_2O$ )  $\delta$  175.6, 174.0, 96.0, 71.1, 70.9, 68.9, 67.4, 63.9, 52.8, 39.5, 22.8; IR (KBr): 3433, 3398, 1719, 1637, 1559, 1457, 1128, 1069,

1036  $\text{cm}^{-1}$  HRMS (ESI):  $m/z$  calcd for  $\text{C}_{11}\text{H}_{19}\text{NO}_9$   $[\text{M}-\text{H}]^-$  308.0987 Found 308.0994,  $[\alpha]_{\text{D}}^{23.4} = -13.2$  ( $c = 0.27$ ,  $\text{H}_2\text{O}$ ).

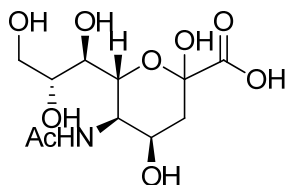

#### 4-*epi*-Neu5Ac (6j')

Using **4j** (26.1 mg, 0.1 mmol), the reaction was conducted by following the procedure for preparing **6j**. The corresponding product was obtained as a pale pink solid (20.1 mg, 65% from **4j**). Mixture of anomers. For the major isomer:  $^1\text{H}$  NMR (500 MHz,  $\text{D}_2\text{O}$ )  $\delta$  4.20 (d,  $J = 10.8$  Hz, 1H), 4.05-3.94 (m, 2H), 3.64 (dd,  $J = 11.8$ , 2.4 Hz, 1H), 3.61 (ddd,  $J = 9.0$ , 5.6, 2.4 Hz, 1H), 3.50-3.40 (m, 2H), 2.02 (dd,  $J = 14.9$ , 3.3 Hz, 1H), 1.97 (dd,  $J = 14.9$ , 3.3 Hz, 1H), 1.87 (s, 3H);  $^{13}\text{C}$  NMR (125 MHz,  $\text{D}_2\text{O}$ )  $\delta$  174.9, 174.0, 95.8, 70.7, 69.1, 66.7, 66.4, 63.9, 48.3, 36.8, 22.6; IR (KBr): 3397, 1750, 1735, 1654, 1637, 1628, 1125, 1089, 1031  $\text{cm}^{-1}$  HRMS (ESI):  $m/z$  calcd for  $\text{C}_{11}\text{H}_{19}\text{NO}_9$   $[\text{M}-\text{H}]^-$  308.0987 Found 308.0994,

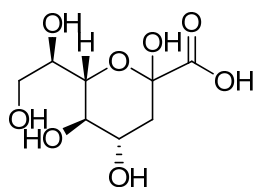

#### (4*S*,5*R*,6*S*)-6-((*R*)-1,2-dihydroxyethyl)-2,4,5-trihydroxytetrahydro-2*H*-pyran-2-carboxylic acid (6d)

Using **4d** (19 mg, 0.1 mmol), the reaction was conducted by following the procedure for preparing **6j**. The corresponding product was obtained as a white solid. (19.5 mg, 82% from **4d**).

$^1\text{H}$  NMR (500 MHz,  $\text{D}_2\text{O}$ )  $\delta$  3.91-3.88 (m, 1H), 3.81 (ddd,  $J = 11.6$ , 9.2, 5.1 Hz, 1H), 3.62-3.58 (m, 1H), 3.53 (dd,  $J = 11.6$ , 7.6 Hz, 1H), 3.49-3.41 (m, 2H), 2.07 (dd,  $J = 13.0$ , 5.1 Hz, 1H), 1.65 (t,  $J = 13.0$ , 1H);  $^{13}\text{C}$  NMR (125 MHz,  $\text{D}_2\text{O}$ )  $\delta$  174.5, 96.1, 73.3, 70.8, 69.3, 69.3, 63.5, 39.3; IR (KBr): 3406, 1685, 1438, 1403, 1207, 1142, 624  $\text{cm}^{-1}$ ; HRMS (ESI):  $m/z$  calcd for  $\text{C}_8\text{H}_{14}\text{O}_8$   $[\text{M}-\text{H}]^-$  237.0615 Found 237.0626;  $[\alpha]_{\text{D}}^{22.6} = -4.5$  ( $c = 6.78$ ,  $\text{H}_2\text{O}$ )

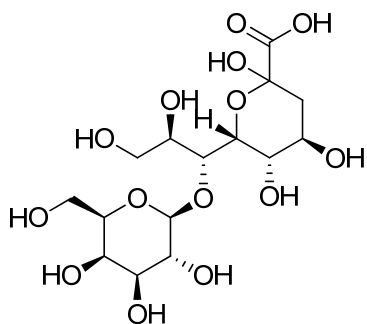

**(4*R*,5*S*,6*R*)-6-((1*R*,2*R*)-2,3-dihydroxy-1-(((2*S*,3*R*,4*S*,5*R*,6*R*)-3,4,5-trihydroxy-6-(hydroxymethyl)tetrahydro-2*H*-pyran-2-yl)oxy)propyl)-2,4,5-trihydroxytetrahydro-2*H*-pyran-2-carboxylic acid (**6m**)**

The reaction was conducted by following the general procedure, using **3m** (100 mg, 0.26 mmol), KBr (74.8 mg, 0.63 mmol), and Oxone (193 mg, 0.63 mmol) in H<sub>2</sub>O (2.4 mL). The reaction mixture was stirred at room temperature for 5 min. Inorganic salts were roughly removed using C<sub>18</sub> reverse phase column, and the crude product was used directly for the next step without further purification. K<sub>2</sub>CO<sub>3</sub> (144 mg, 1.0 mmol) was added to the crude product dissolved in H<sub>2</sub>O (2.4 mL). The reaction was stirred for 30 min. Then CH<sub>3</sub>COOH was added dropwise until pH = 4, and Pinnick oxidation using NaClO<sub>2</sub> (25.9 mg, 0.29 mmol), *t*BuOH (2.4 mL), and 2-methyl-2-butene (275  $\mu$ L, 0.90 mmol) was carried out in one pot. The crude product was passed through a Dowex 1X8 resin (acetate form) using aqueous CH<sub>3</sub>COOH solution (0-2 M) as an eluent. Products were purified by preparative reverse phase HPLC using a gradient of acetonitrile versus 0.1% TFA in water, affording **6m** as a white solid (59.3 mg, 53% from **3m**). Preparative HPLC was carried out as follows: YMC-Triart C18 (20 mm I.D  $\times$  250 mm) column using a linear gradient of 0-50% acetonitrile in 0.1% aqueous TFA over 30 min at room temperature with a flow rate of 7.0 mL min<sup>-1</sup>.

<sup>1</sup>H NMR (400 MHz, D<sub>2</sub>O)  $\delta$  4.33 (dd,  $J$  = 7.7, 2.1 Hz, 1H), 4.17 (dd,  $J$  = 9.3, 2.1 Hz, 1H), 3.83-3.76 (m, 5H), 3.63-3.48 (m, 6H), 3.40-3.35 (m, 1H), 2.92 (ddd,  $J$  = 18.1, 5.1, 2.2 Hz, 1H), 2.41 (dd,  $J$  = 18.1, 2.2 Hz, 1H); <sup>13</sup>C NMR (125 MHz, D<sub>2</sub>O)  $\delta$  180.4, 103.5, 87.1, 76.8, 75.6, 73.2, 71.7, 71.4, 69.3, 68.5, 67.9, 62.8, 61.9, 40.3; IR (neat): 3389, 1758, 1638, 1077, 1043; HRMS (ESI):  $m/z$  calcd for C<sub>15</sub>H<sub>26</sub>O<sub>14</sub> [M-H]<sup>-</sup> 429.1249 Found 429.1266;  $[\alpha]_D^{21.3}$  = +21.5 ( $c$  = 2.28, H<sub>2</sub>O).

DFILE 3a s-skp mannose alkyne.als  
 COMNT 2014-12-06 10:43:55  
 DATIM 1H  
 OBNUC proton.jxp  
 EXMOD 500.16 MHz  
 OBFRQ 2.41 KHz  
 OBSET 6.01 Hz  
 OBFIN 13107  
 POINT 7507.51 Hz  
 FREQU 12  
 SCANS 1.7459 sec  
 ACQTM 5.0000 sec  
 PD 5.55 usec  
 PW1 1H  
 IRNUC 24.9 c  
 CTEMP 4.65 ppm  
 SLVNT D2O  
 EXREF 0.12 Hz  
 BF 32  
 RGAIN

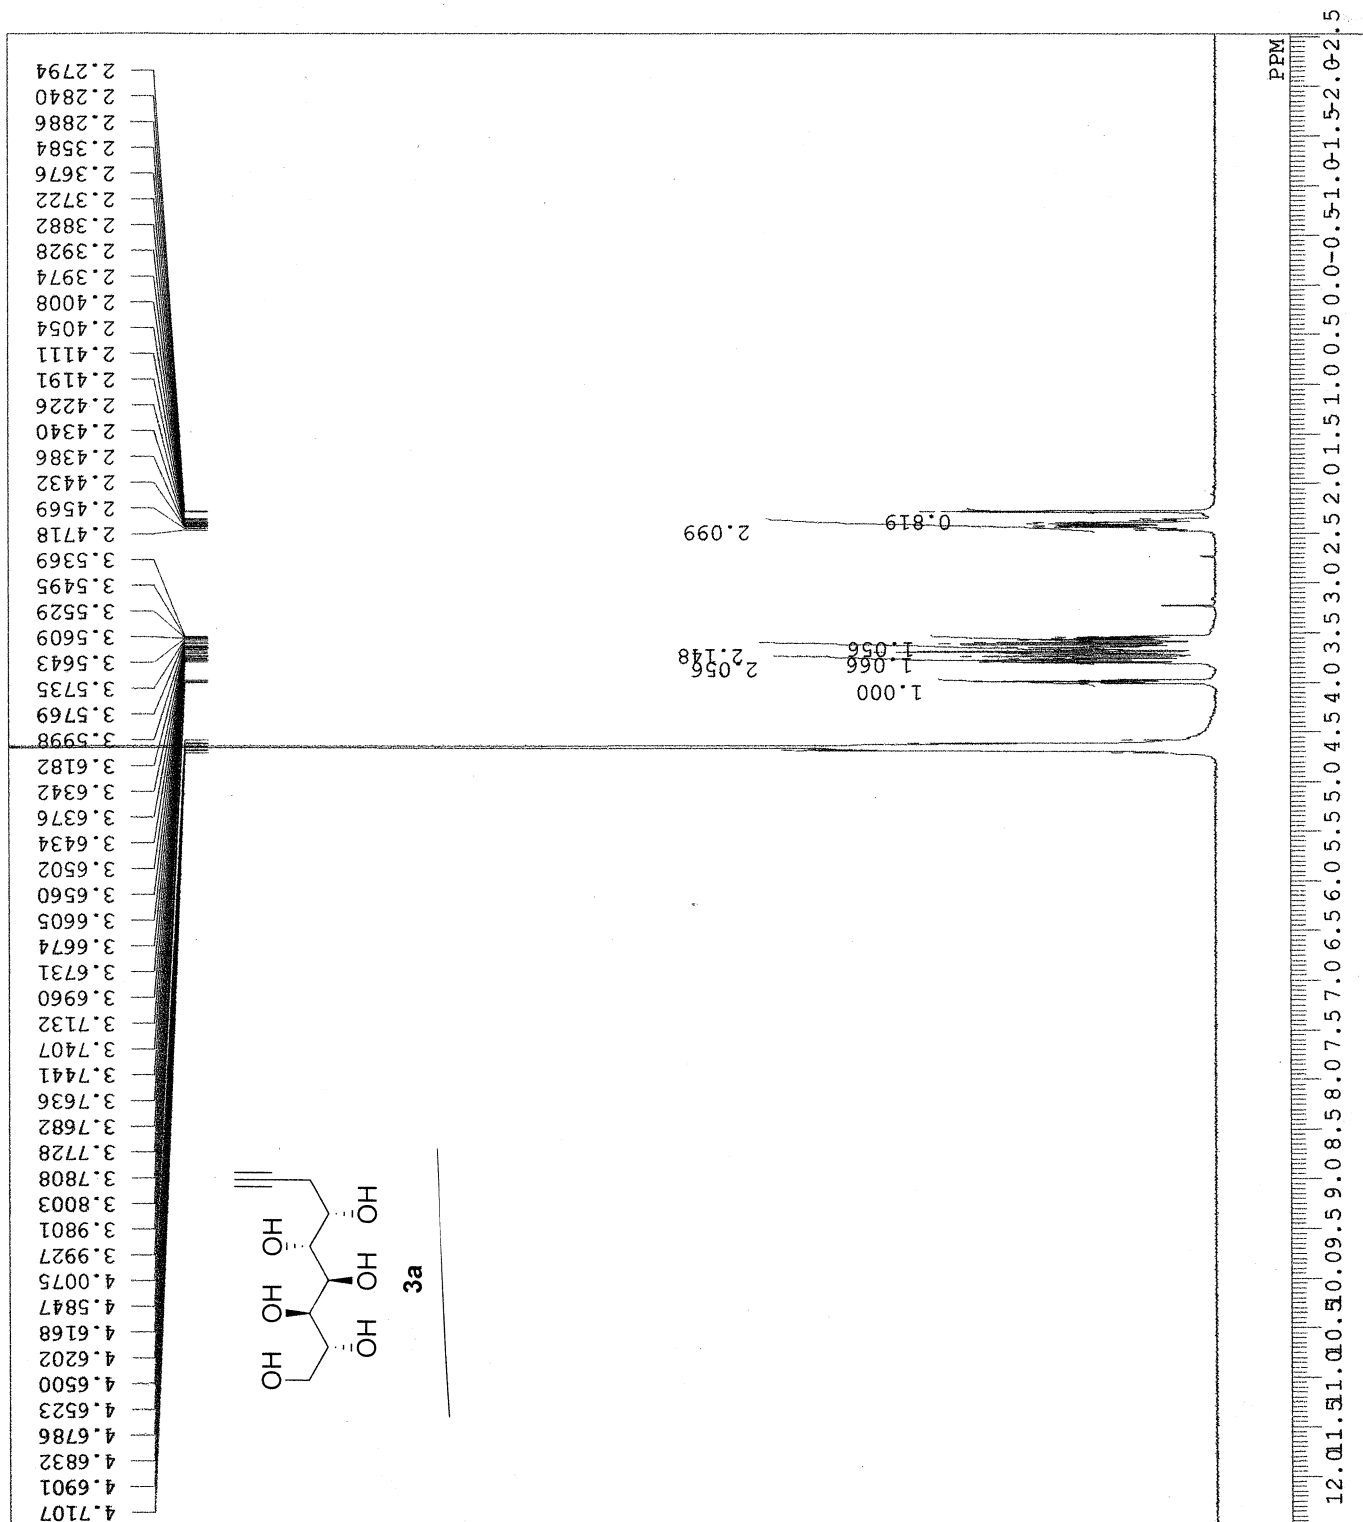

3a s-skp mannose alkyne .jdf

DFILE  
COMNT  
DATIM 2014-12-06 11:27:06  
OBNUC 13C  
EXMOD carbon,jxp  
OBFRQ 125.77 MHz  
OBSET 7.87 KHz  
OBFIN 4.21 Hz  
POINT 32767  
FREQU 39308.18 Hz  
SCANS 286  
ACQTM 0.8336 sec  
PD 2.0000 sec  
PW1 3.40 usec  
IRNUC 1H  
CTEMP 25.7 c  
SLVNT DMSO  
EXREF 39.50 ppm  
BF 0.12 Hz  
RGAIN 60

82.7944  
71.7586  
71.5774  
70.0894  
69.6697  
68.4965  
63.8895  
40.0055  
39.9292  
39.8338  
39.7575  
39.6717  
39.6049  
39.5858  
39.5000  
39.4428  
39.4142  
39.3378  
39.2234  
39.1662  
39.0040  
23.5710

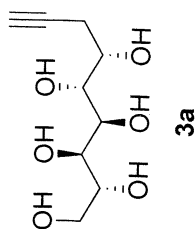

3a

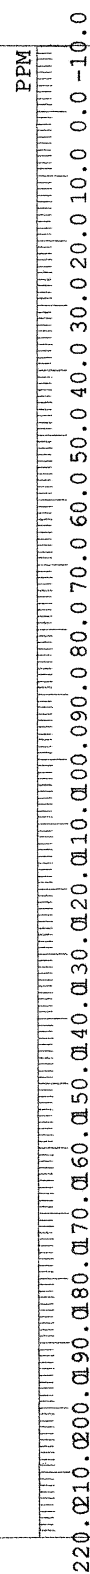

PGF R-skp mannose-1-1.jdf

|       |                     |
|-------|---------------------|
| COMNT | 2015-05-23 10:26:59 |
| DATIM | 1H                  |
| OBNUC | proton.jxp          |
| EXMOD | 500.16 MHz          |
| OBFRQ | 2.41 KHz            |
| OBSET | 6.01 Hz             |
| OBFIN | 16384               |
| POINT | 9384.38 Hz          |
| FREQU | 8                   |
| SCANS | 1.7459 sec          |
| ACQTM | 5.0000 sec          |
| PD    | 5.55 usec           |
| PW1   | 1H                  |
| IRNUC | 20.9 c              |
| CTEMP | D2O                 |
| SLVNT | 4.65 ppm            |
| EXREF | 0.12 Hz             |
| BF    | 30                  |
| RGAIN |                     |

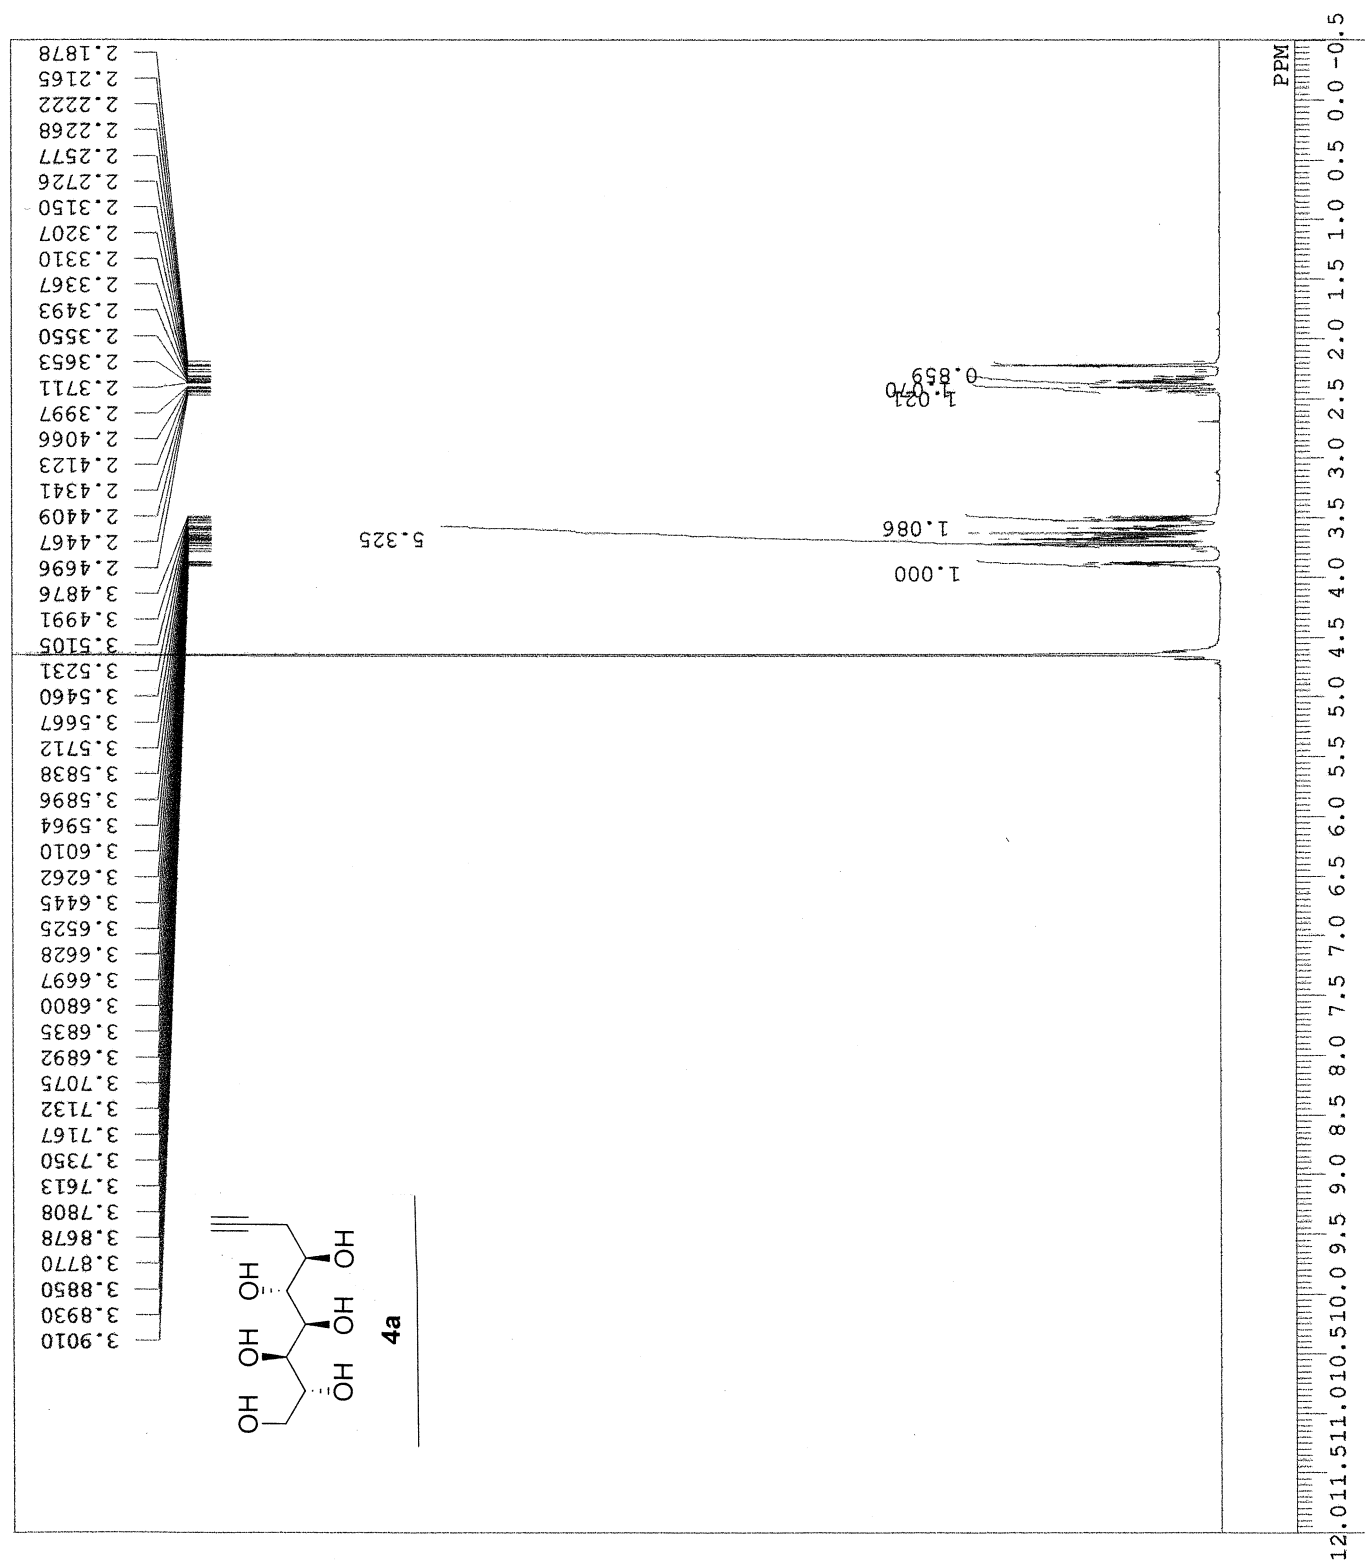

①

4a R-skp mannose cab-1-1.jdf

DFILE  
COMNT  
DATIM 2015-05-23 10:28:35  
OENUC 13C  
EXMOD carbon.jxp  
OBFRQ 125.77 MHz  
OBSET 7.87 KHz  
OBFIN 4.21 Hz  
POINT 32768  
FREQU 31446.54 Hz  
SCANS 292  
AQTM 1.0420 sec  
PD 2.0000 sec  
PWL 3.40 usec  
IRNUC 1H  
CTEMP 20.9 C  
SLVNT D2O  
EXREF 49.50 ppm  
BF 1.02 Hz  
RGAIN 76

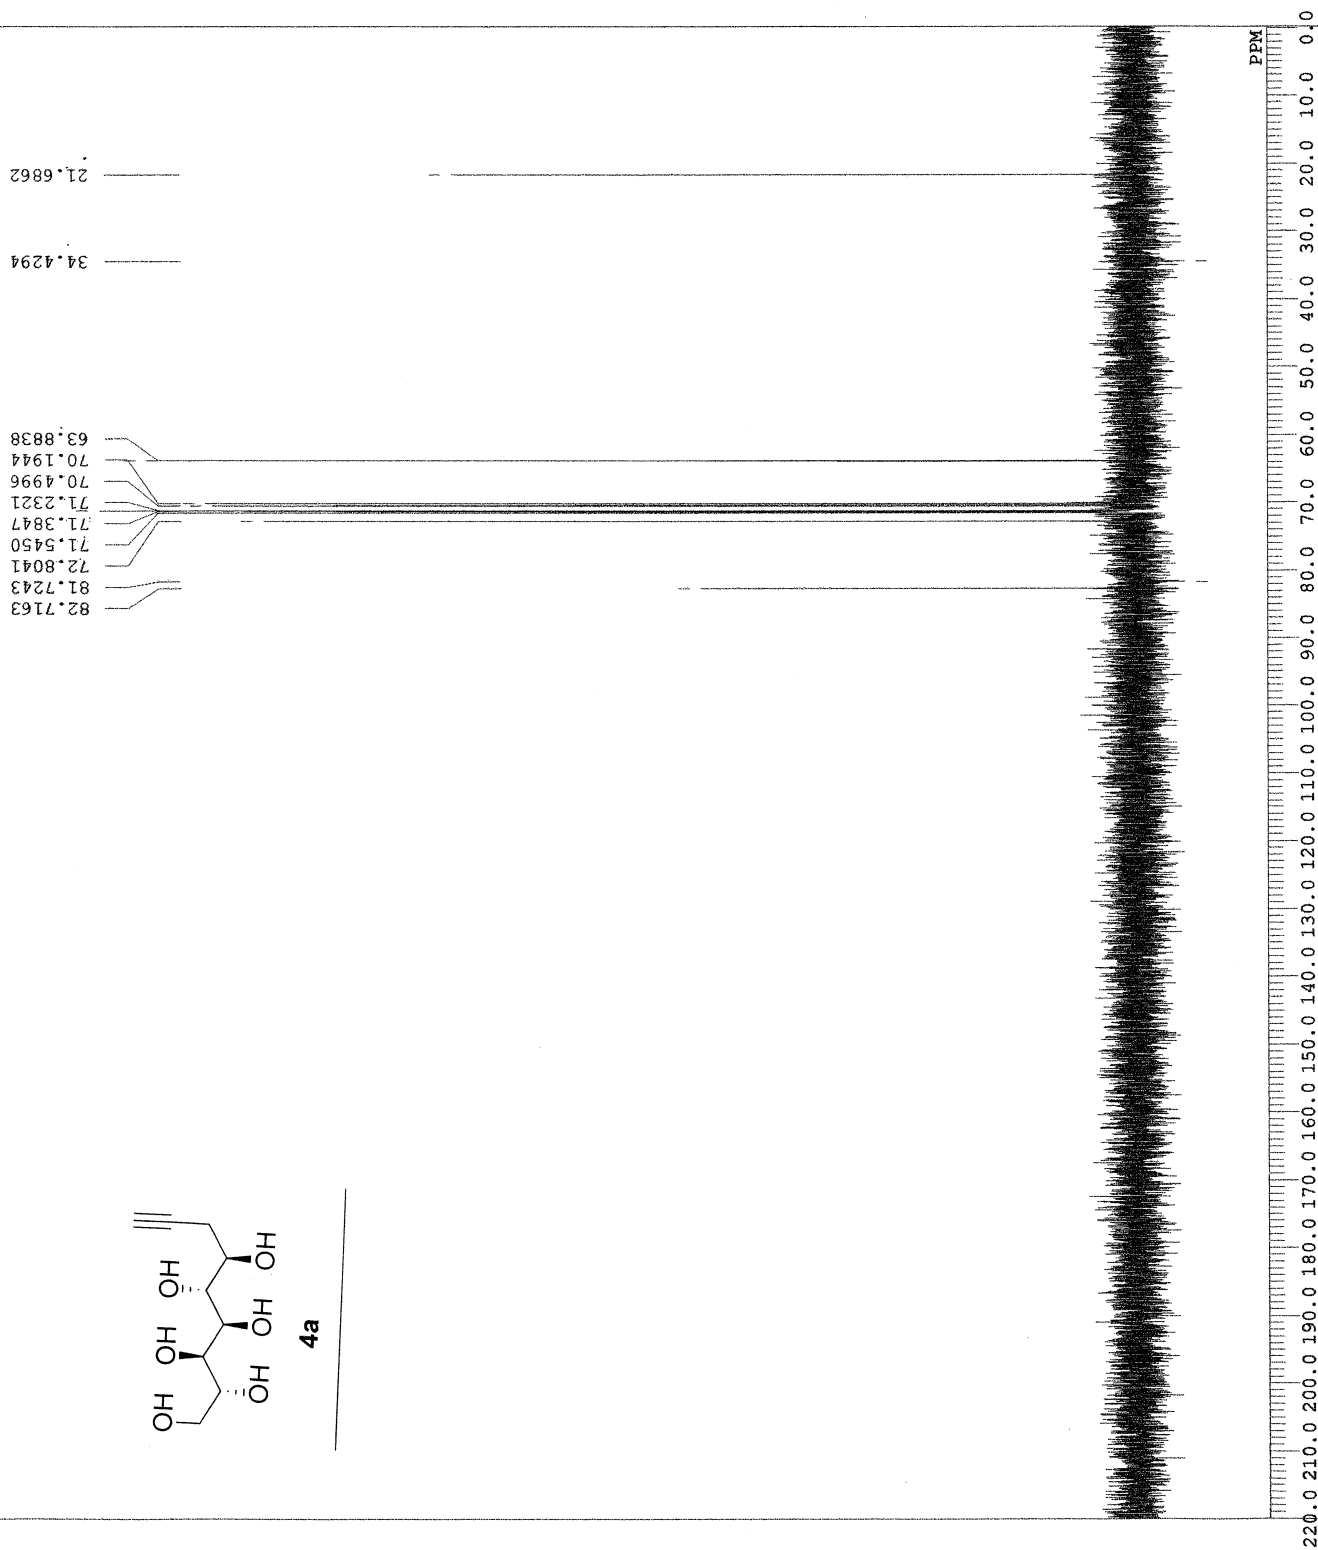

3b

C:\Documents and Settings\user1\ffxfNfgfbf\Gousei\wei\propargylation\data collection\NATURE DATA\protone\wei 928-2-1-1.jdf

DFILE wei 928-1-1-1.jdf  
 COMNT 2015-07-07 12:33:05  
 DATIM 1H  
 OENUC proton.jxp  
 EXMOD 500.16 MHz  
 OBFRQ 2.41 KHz  
 OBSET 6.01 Hz  
 OBFIN 16384  
 POINT 9384.38 Hz  
 FREQU 10  
 SCANS 1.7459 sec  
 ACQTM 5.0000 sec  
 PD 5.55 usec  
 PW1 1H  
 IRNUC 21.0 c  
 CTEMP D2O  
 SIVNT 4.65 ppm  
 EXREF 0.12 Hz  
 BF 30  
 RGAIN

4.6798  
 4.6500  
 4.6202  
 3.8392  
 3.8255  
 3.8129  
 3.7957  
 3.7865  
 3.7682  
 3.7487  
 3.7316  
 3.7235  
 3.7201  
 3.7132  
 3.7064  
 3.7018  
 3.6915  
 3.6732  
 3.5403  
 3.5277  
 3.5071  
 2.5417  
 2.5371  
 2.5314  
 2.5074  
 2.5016  
 2.4959  
 2.3997  
 2.3951  
 2.3894  
 2.3837  
 2.3653  
 2.3596  
 2.3539  
 2.3493  
 2.2233  
 2.2188  
 2.2130  
 2.1890

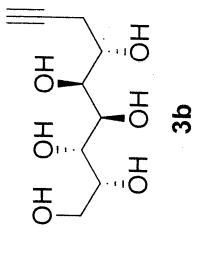

3b

1.0448  
 1.0189  
 2.141  
 3.199

1.000  
 1.093  
 0.787

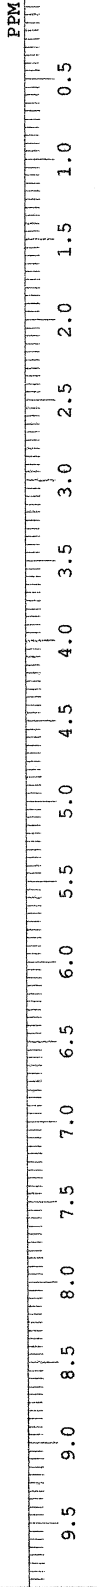



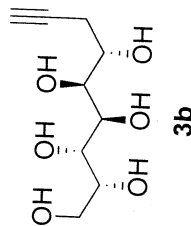

75.0496  
72.0450  
71.3105  
69.6508  
67.9720  
64.8625  
49.5151  
49.3625  
49.3434  
49.1717  
49.0000  
48.8378  
48.6662  
48.4945  
40.8637  
28.6926  
28.6640

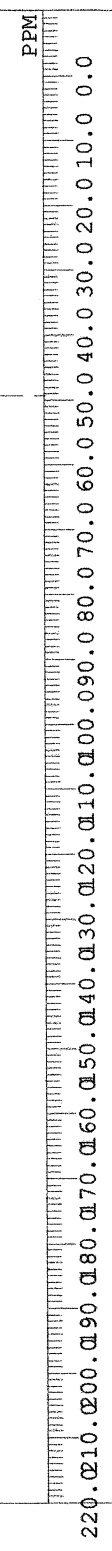

3b

DFILE wei s-skp galactose alkyne ca:  
 COMNT 2015-07-17 17:20:36  
 DATIM 13C  
 OBNUC carbon.jxp  
 EXMOD 125.77 MHz  
 OBFRQ 7.87 KHz  
 OBSET 4.21 Hz  
 OBFIN 26214  
 POINT 31446.54 Hz  
 FREQU 998  
 SCANS 0.8336 sec  
 ACQTM 2.0000 sec  
 PD 3.40 usec  
 PW1 1H  
 IRNUC 21.9 c  
 CTEMP CD3OD  
 SLVNT 49.00 ppm  
 EXREF 0.12 Hz  
 BF 60  
 RGAIN

4b

DFILE r-skp galactose-1-1.jdf  
 COMNT 2015-07-25 12:59:53  
 DATIM 1H  
 OBNUC proton.jxp  
 EXMOD 500.16 MHz  
 OBFRQ 2.41 KHz  
 OBSET 6.01 Hz  
 OBFIN 16384  
 POINT 9384.38 Hz  
 FREQU 9  
 SCANS 1.7459 sec  
 ACQTM 5.0000 sec  
 PD 5.55 usec  
 PW1 1H  
 IRNUC 21.3 c  
 CTEMP 4.65 ppm  
 SLVNT D2O  
 EXREF 0.12 Hz  
 BF 30  
 RGAIN

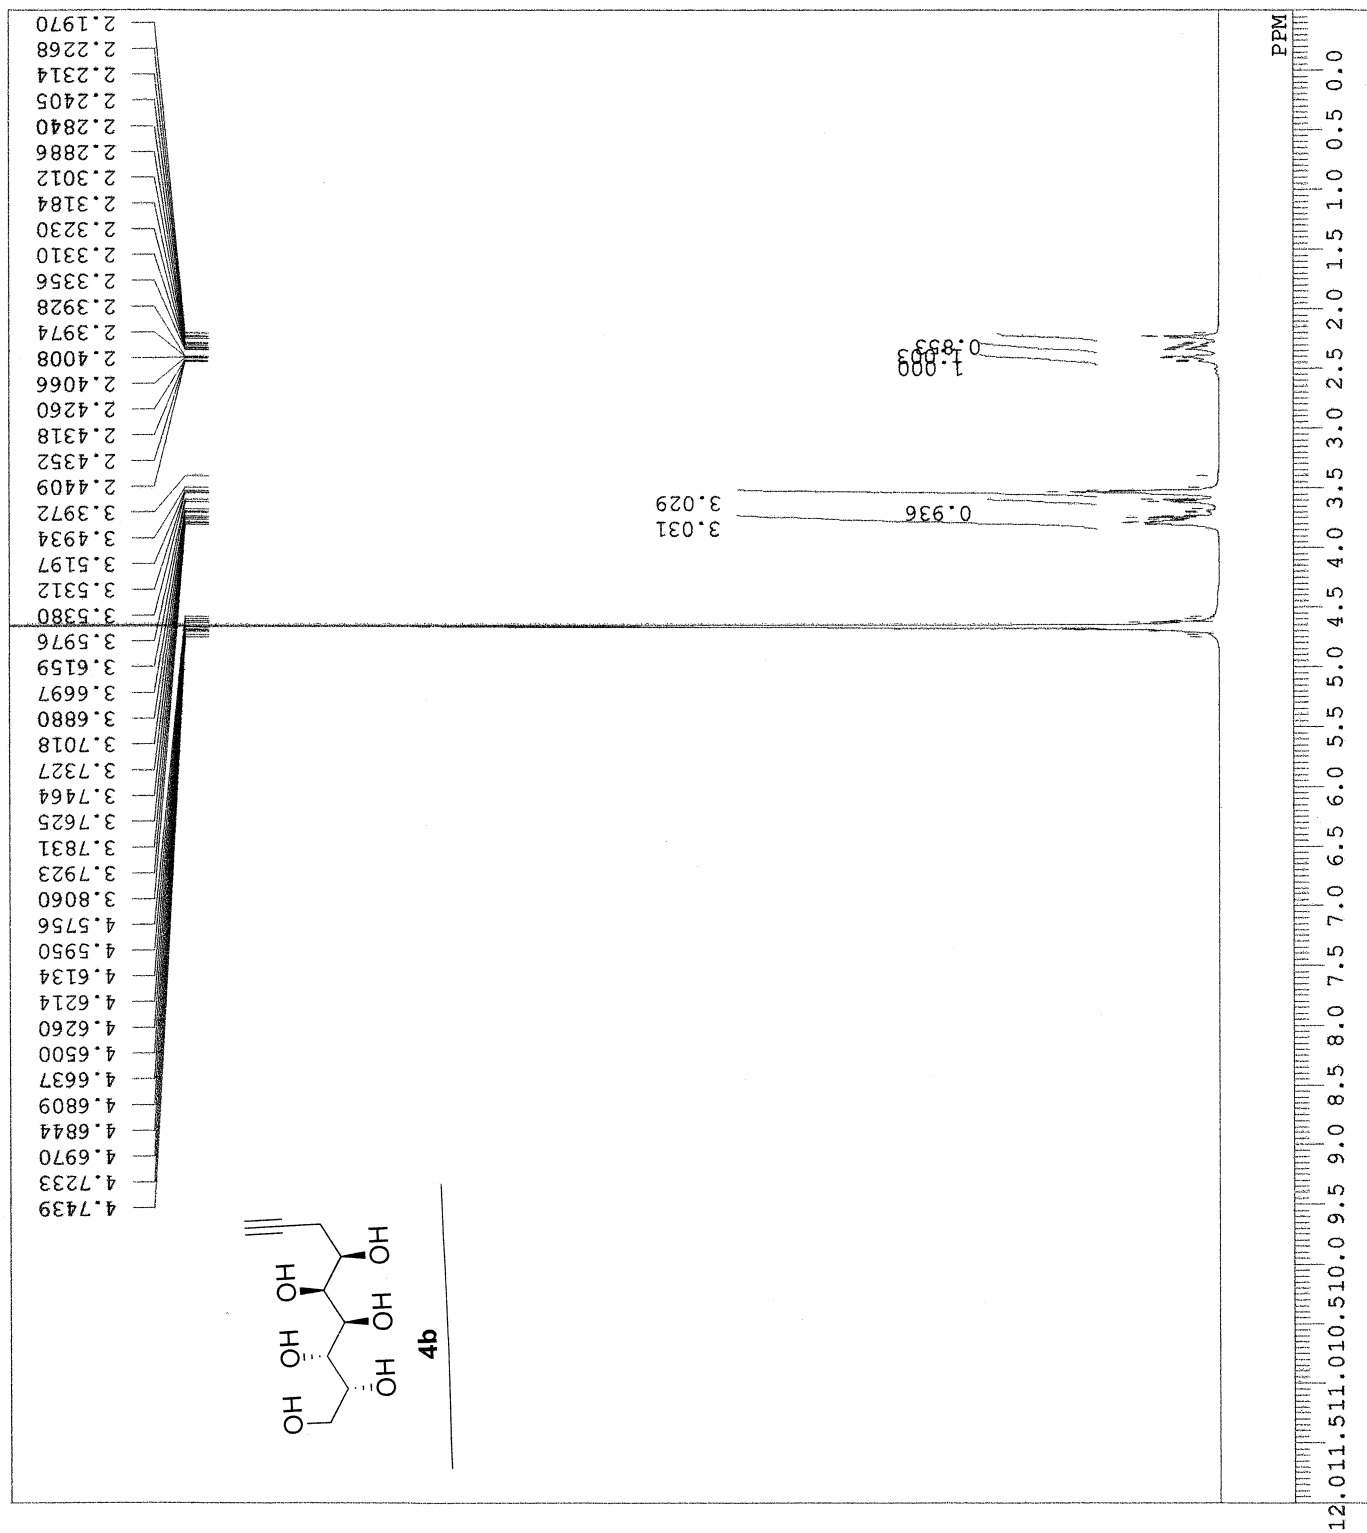

4b

```

DFILE  wei r-galactose mathanol carb.
COMNT
DATIM  2015-07-25 15:35:02
OBNUC  13C
EXMOD  carbon.jxp
OBFRQ  125.77 MHz
OBSET  7.87 KHz
OBFIN  4.21 Hz
POINT  32767
FREQU  39308.18 Hz
SCANS  118
ACQTM  0.0000 sec
PD      2.0000 sec
PW1     3.40 usec
IRNUC   1H
CTEMP   21.7 c
SLVNT   CD3OD
EXREF   49.00 ppm
BF       0.12 Hz
RGAIN   60
  
```

81.8787  
 73.6471  
 73.1892  
 71.6536  
 71.4151  
 71.1671  
 64.9195  
 49.5151  
 49.3434  
 49.3338  
 49.1717  
 49.1622  
 49.1335  
 49.0191  
 49.0000  
 48.8283  
 48.6566  
 48.4945  
 24.2576

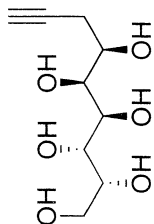

4b

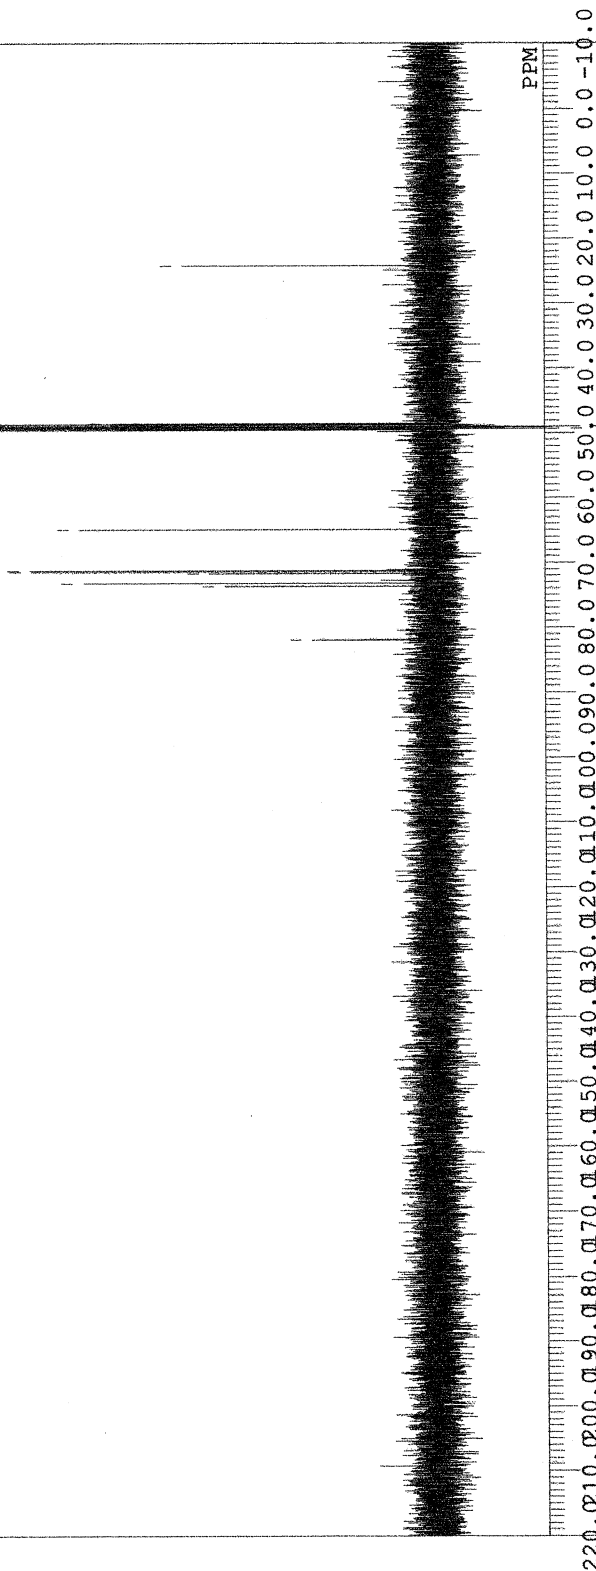

3c

```

DFFILE wei s-skp glucose-1-1.als
COMNT 2015-07-11 10:31:54
DATIM 1H
OBNUC proton.jxp
EXMOD 500.16 MHz
OBFQ 2.41 KHz
OBSE 6.01 Hz
OBFN 13107
POINT 7507.51 Hz
FREQ 6
SCANS 1.7459 sec
ACQTM 5.0000 sec
PD 5.55 usec
PW1 1H
IRNUC 20.8 c
CTEMP 4.65 ppm
SLVNT D2O
EXREF 0.12 Hz
BF 30
RGAIN
  
```

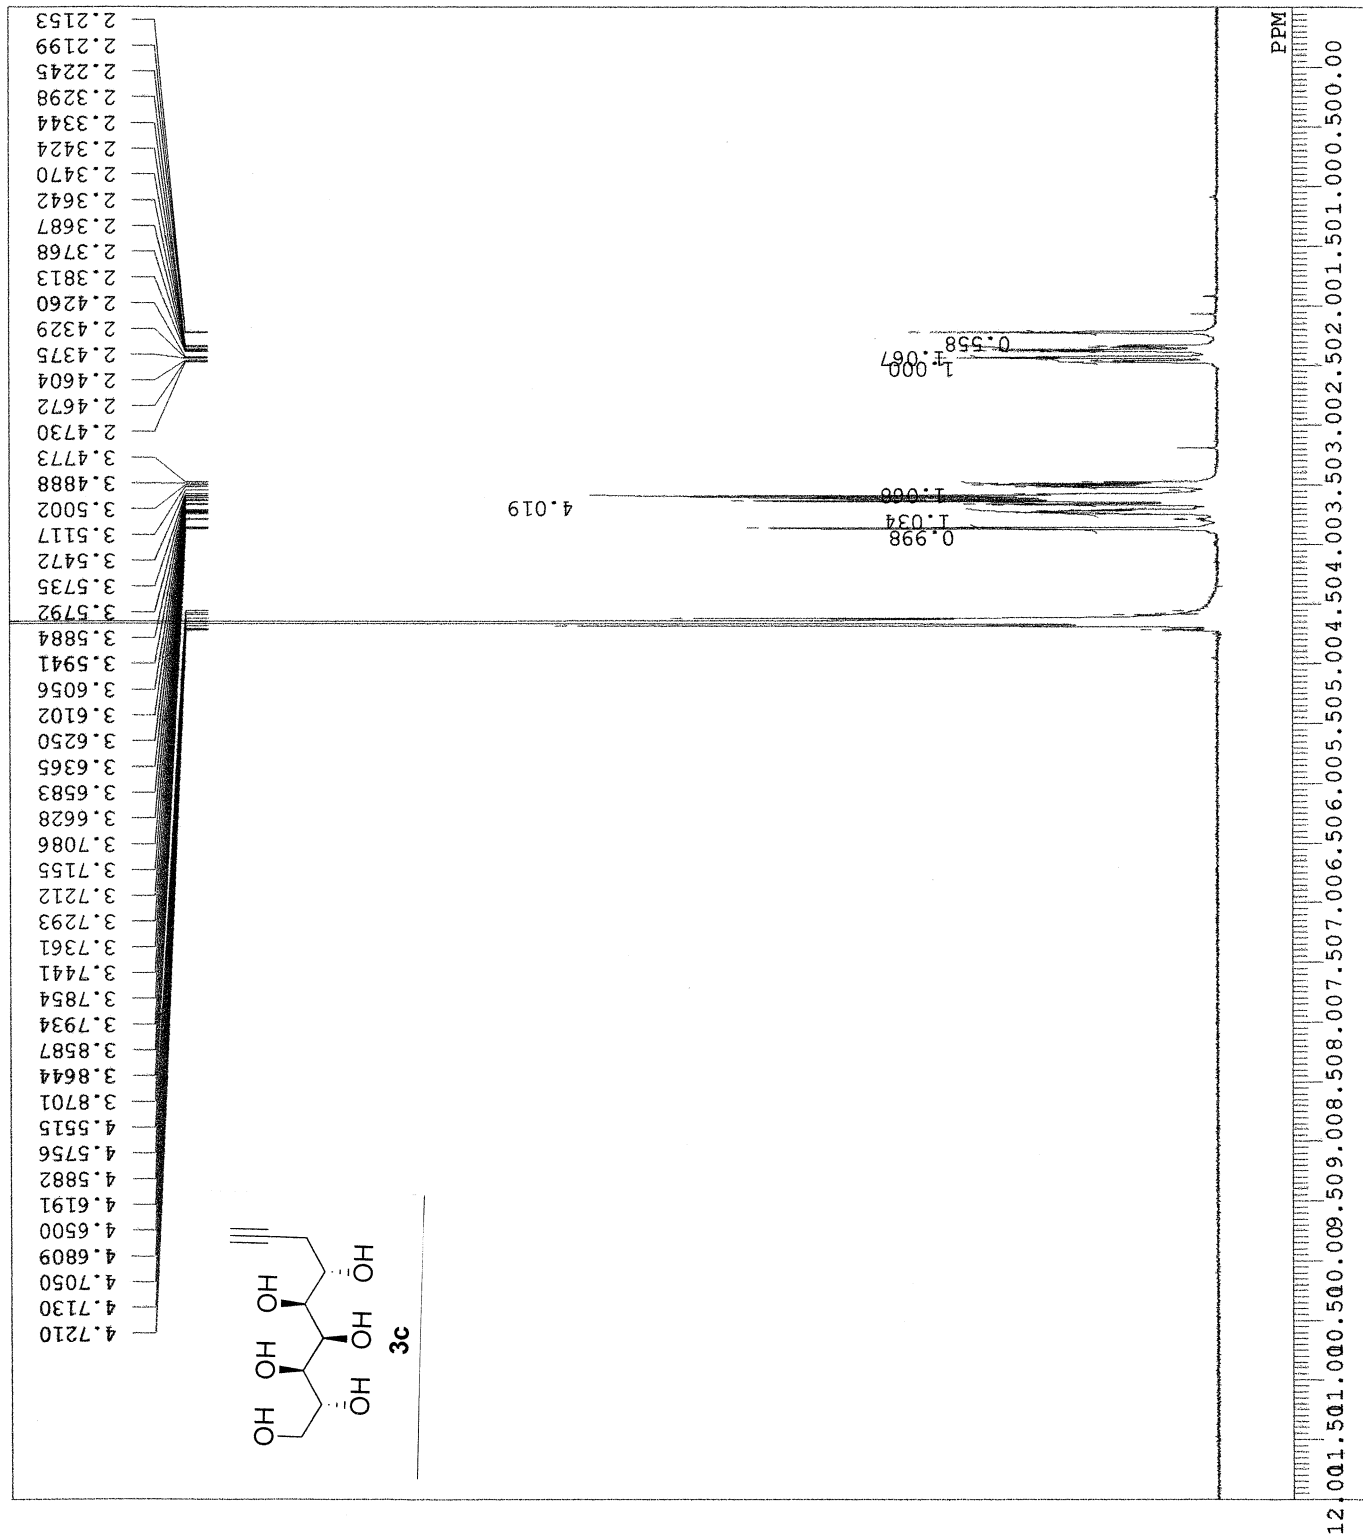

DFILE wei s-skp glucose carb-1-1.jd  
 COMNT 2015-07-11 10:33:09  
 DATIM 13C  
 OBNUC carbon.jpg  
 EXMOD 125.77 MHz  
 OBFRQ 7.87 KHz  
 OBSET 4.21 Hz  
 OBFIN 32767  
 POINT 39308.18 Hz  
 FREQU 1013  
 SCANS 0.8336 sec  
 ACQTM 2.0000 sec  
 PD 3.40 usec  
 PW1 1H  
 IRNUC 21.4 c  
 CTEMP 77.00 ppm  
 SLVNT D2O  
 EXREF 0.12 Hz  
 BF 60  
 RGAIN

23.0130

63.1122  
 68.7589  
 69.1786  
 71.7253  
 71.8207  
 73.6234  
 74.6059  
 81.9027

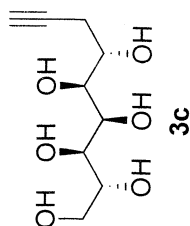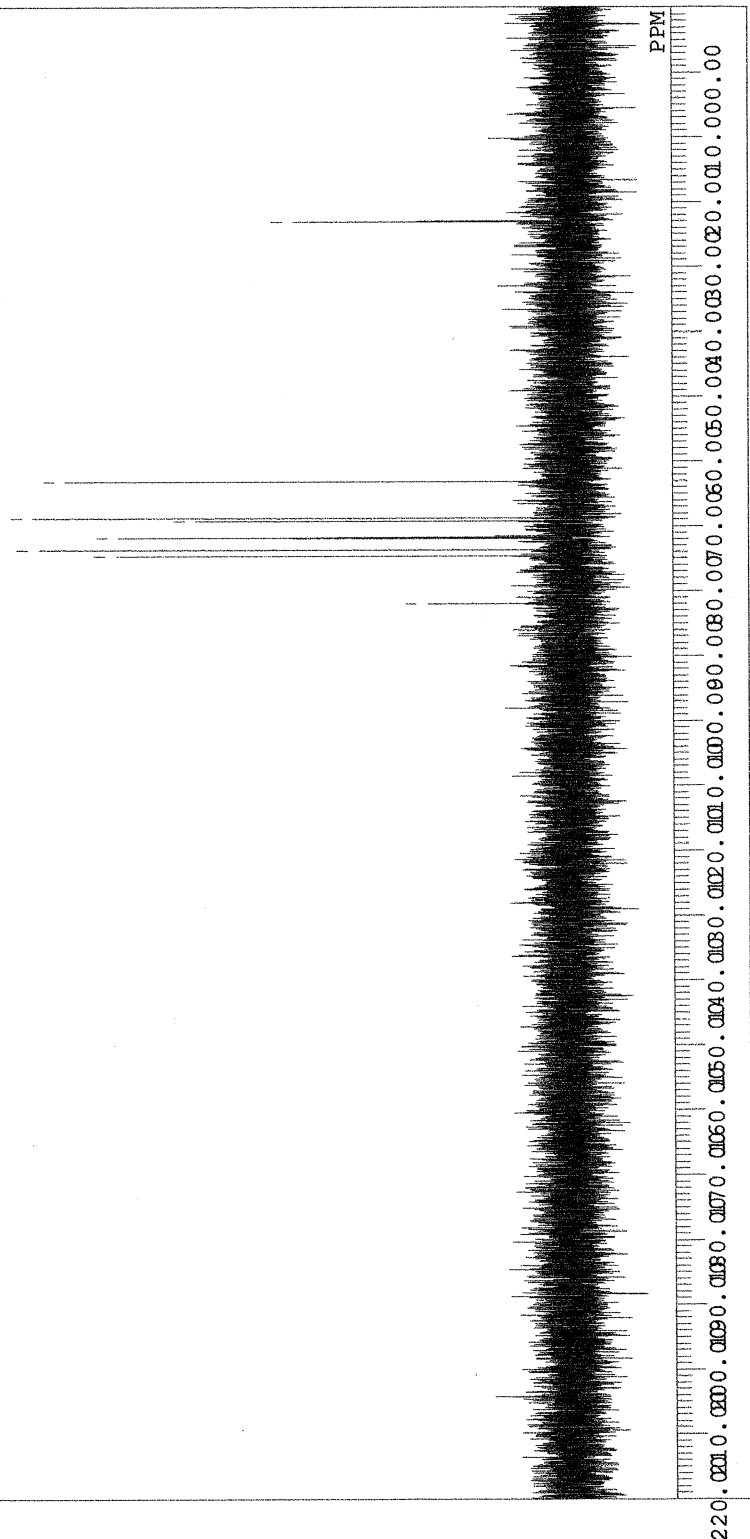

C:\Documents and Settings\user1\ffxNfgfbf\Gouse\wei\propargylation\data collection\NATURE DATA\wei r-skp glucose-1-1.jdf

```

DFILE      wei r-skp glucose-1-1.jdf
COMNT
DATIM      2015-07-28 13:49:20
OBNUC      1H
EXMOD      proton.jxp
OBFREQ     500.16 MHz
OBSET      2.41 KHz
OBFIN      6.01 Hz
POINT      16384
FREQU      9384.38 Hz
SCANS      12
ACQTM      1.7459 sec
PD          5.0000 sec
PW1         5.55 usec
IRNUC      1H
CTEMP       21.5 c
SLVNT      CD3OD
EXREF      3.30 ppm
BF          0.12 Hz
RGAIN      30
  
```

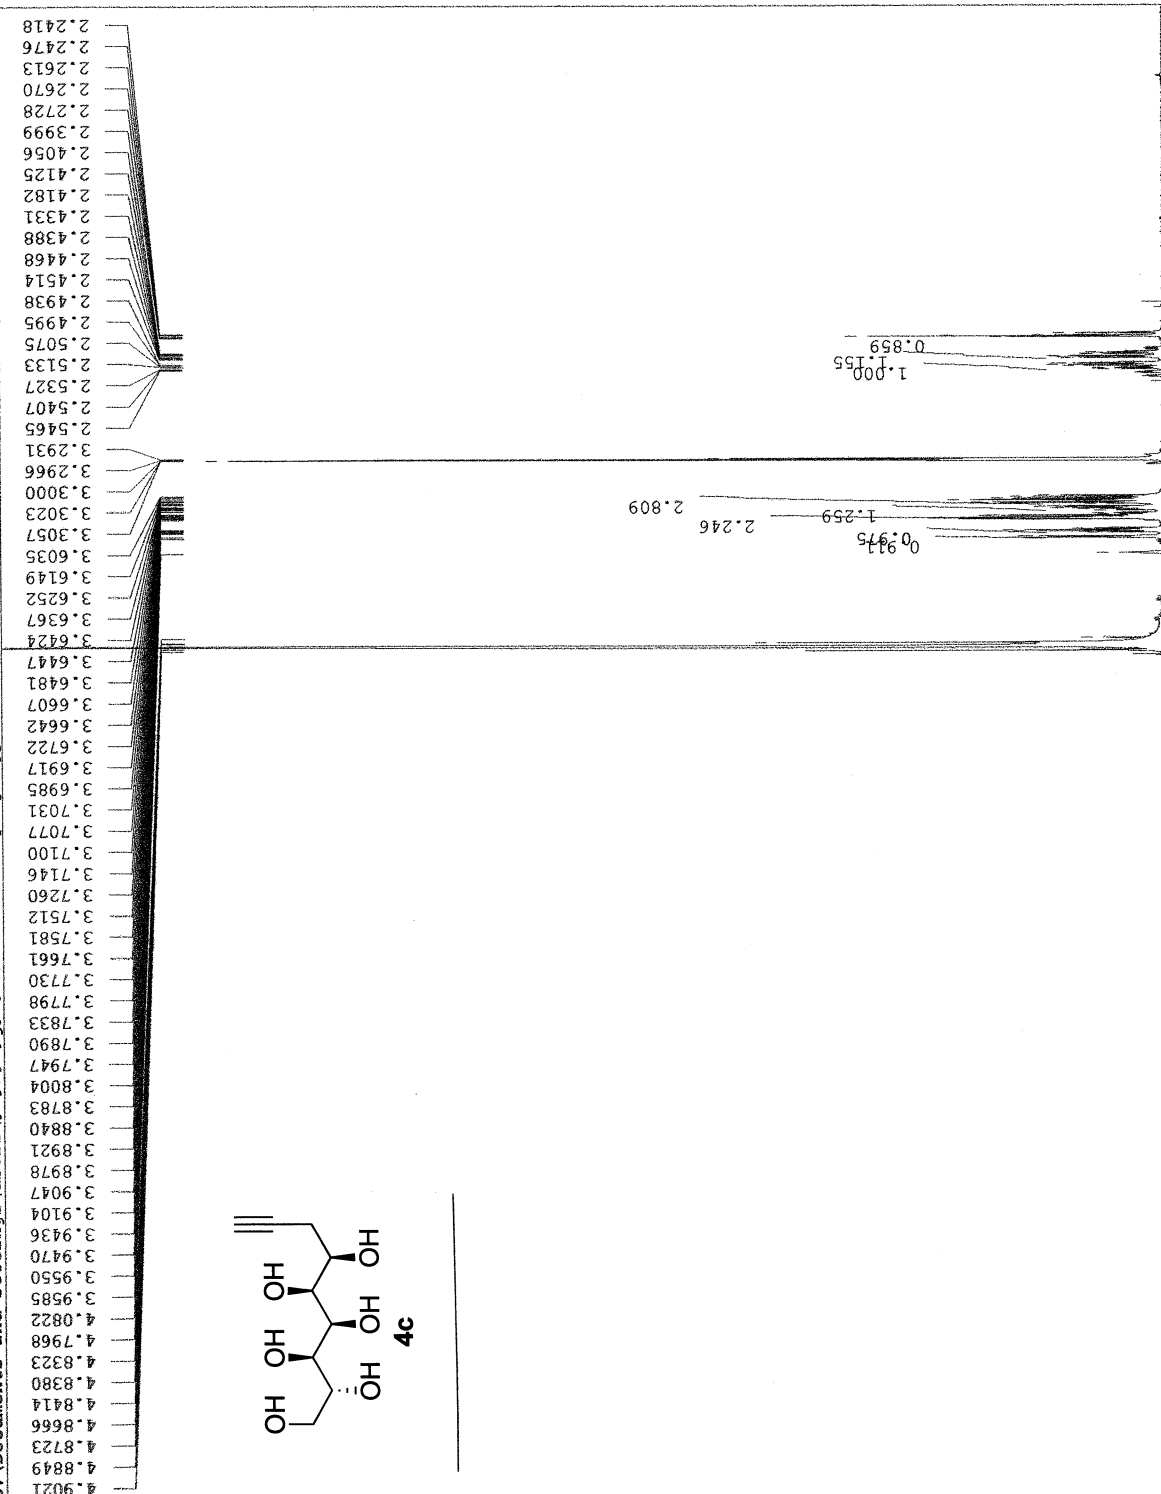

12.0 11.5 11.0 10.5 10.0 9.5 9.0 8.5 8.0 7.5 7.0 6.5 6.0 5.5 5.0 4.5 4.0 3.5 3.0 2.5 2.0 1.5 1.0 0.5 0.0 -0.5

C:\Documents and Settings\user1\ffxNfgfbv\Gousei\wei\propargylation\data collection\NATURE DATA\final one\carb\wei r-skp glucose carb-2-1.jdf

DFILS wei r-skp glucose carb-2-1.jdf  
 COMNT 2015-09-11 10:43:23  
 OENUC 13C  
 EXMOD carbon.jpg  
 OFRQ 125.77 MHz  
 OSET 7.87 KHz  
 OFIN 4.21 Hz  
 POINT 32767  
 FREQU 39308.18 Hz  
 SCANS 2180  
 ACQTM 0.8336 sec  
 PD 2.0000 sec  
 PW1 3.40 usec  
 IRNUC 1H  
 CTEMP 21.7 C  
 SLVNT D2O  
 EXREF 49.50 ppm  
 BF 1.20 Hz  
 RGAIN 60

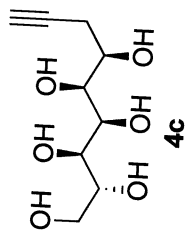

82.0543  
 74.7384  
 73.8991  
 73.7560  
 71.9532  
 71.8579  
 71.8292  
 71.6957  
 70.6274  
 69.9883  
 69.3207  
 68.9010  
 63.4641  
 63.2447

23.6702  
 23.1551

PPM

220.0 210.0 200.0 190.0 180.0 170.0 160.0 150.0 140.0 130.0 120.0 110.0 100.0 90.0 80.0 70.0 60.0 50.0 40.0 30.0 20.0 10.0 0.0

3d S-SKP lyxose alkyne.als

|       |       |                     |       |            |            |          |         |       |            |       |            |            |           |       |        |       |          |         |       |
|-------|-------|---------------------|-------|------------|------------|----------|---------|-------|------------|-------|------------|------------|-----------|-------|--------|-------|----------|---------|-------|
| DFILE | COMNT | DATIM               | OBNUC | EXMOD      | OBFRQ      | OBSET    | OBFIN   | POINT | FREQU      | SCANS | ACQTM      | PD         | PW1       | IRNUC | CTEMP  | SLVNT | EXREF    | BF      | RGAIN |
|       |       | 2015-04-27 16:50:14 | 1H    | proton.jxp | 500.16 MHz | 2.41 KHz | 6.01 Hz | 13107 | 7507.51 Hz | 12    | 1.7459 sec | 5.0000 sec | 5.55 usec | 1H    | 28.0 c | D2O   | 4.65 ppm | 0.12 Hz | 34    |

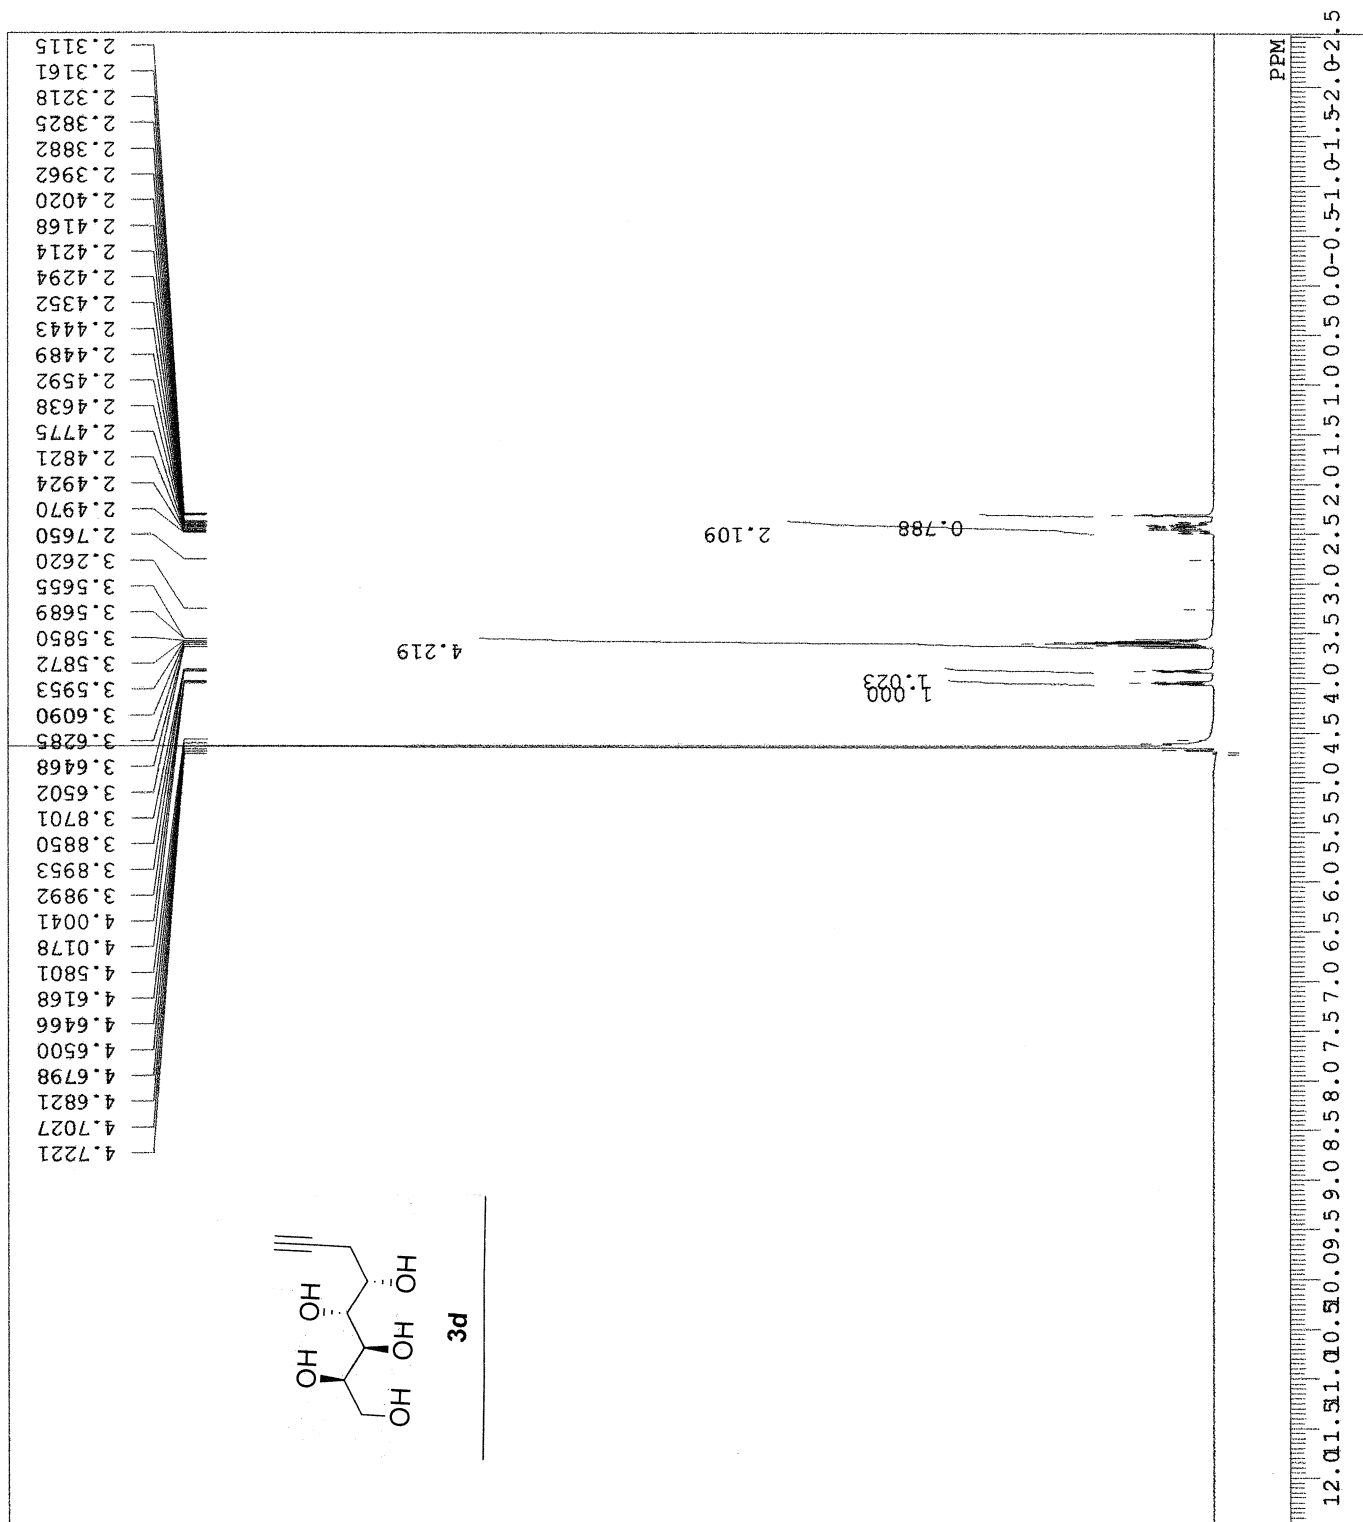



DFILE COMMT  
 DATIM 2015-09-03 22:02:21  
 13C  
 carbon.jpg  
 EXMOD 125.77 MHz  
 OBFRQ 7.87 KHz  
 OBSRT 4.21 Hz  
 OBFIN 32767  
 POINT 39308.18 Hz  
 FREQU 1344  
 SCANS 0.8336 sec  
 ACQTM 2.0000 sec  
 PD 3.40 usec  
 PW1 1H  
 IRNUC 21.6 c  
 CTEMP D2O  
 SLVNT 49.50 ppm  
 EXREF 0.12 Hz  
 BF 60  
 RGAIN

C:\Documents and Settings\user1\My Documents\Goussell\propargylation\data collection\NATURE DATA\final one\carb\wet 3d s-skip lyxose carb-1-1.jdf

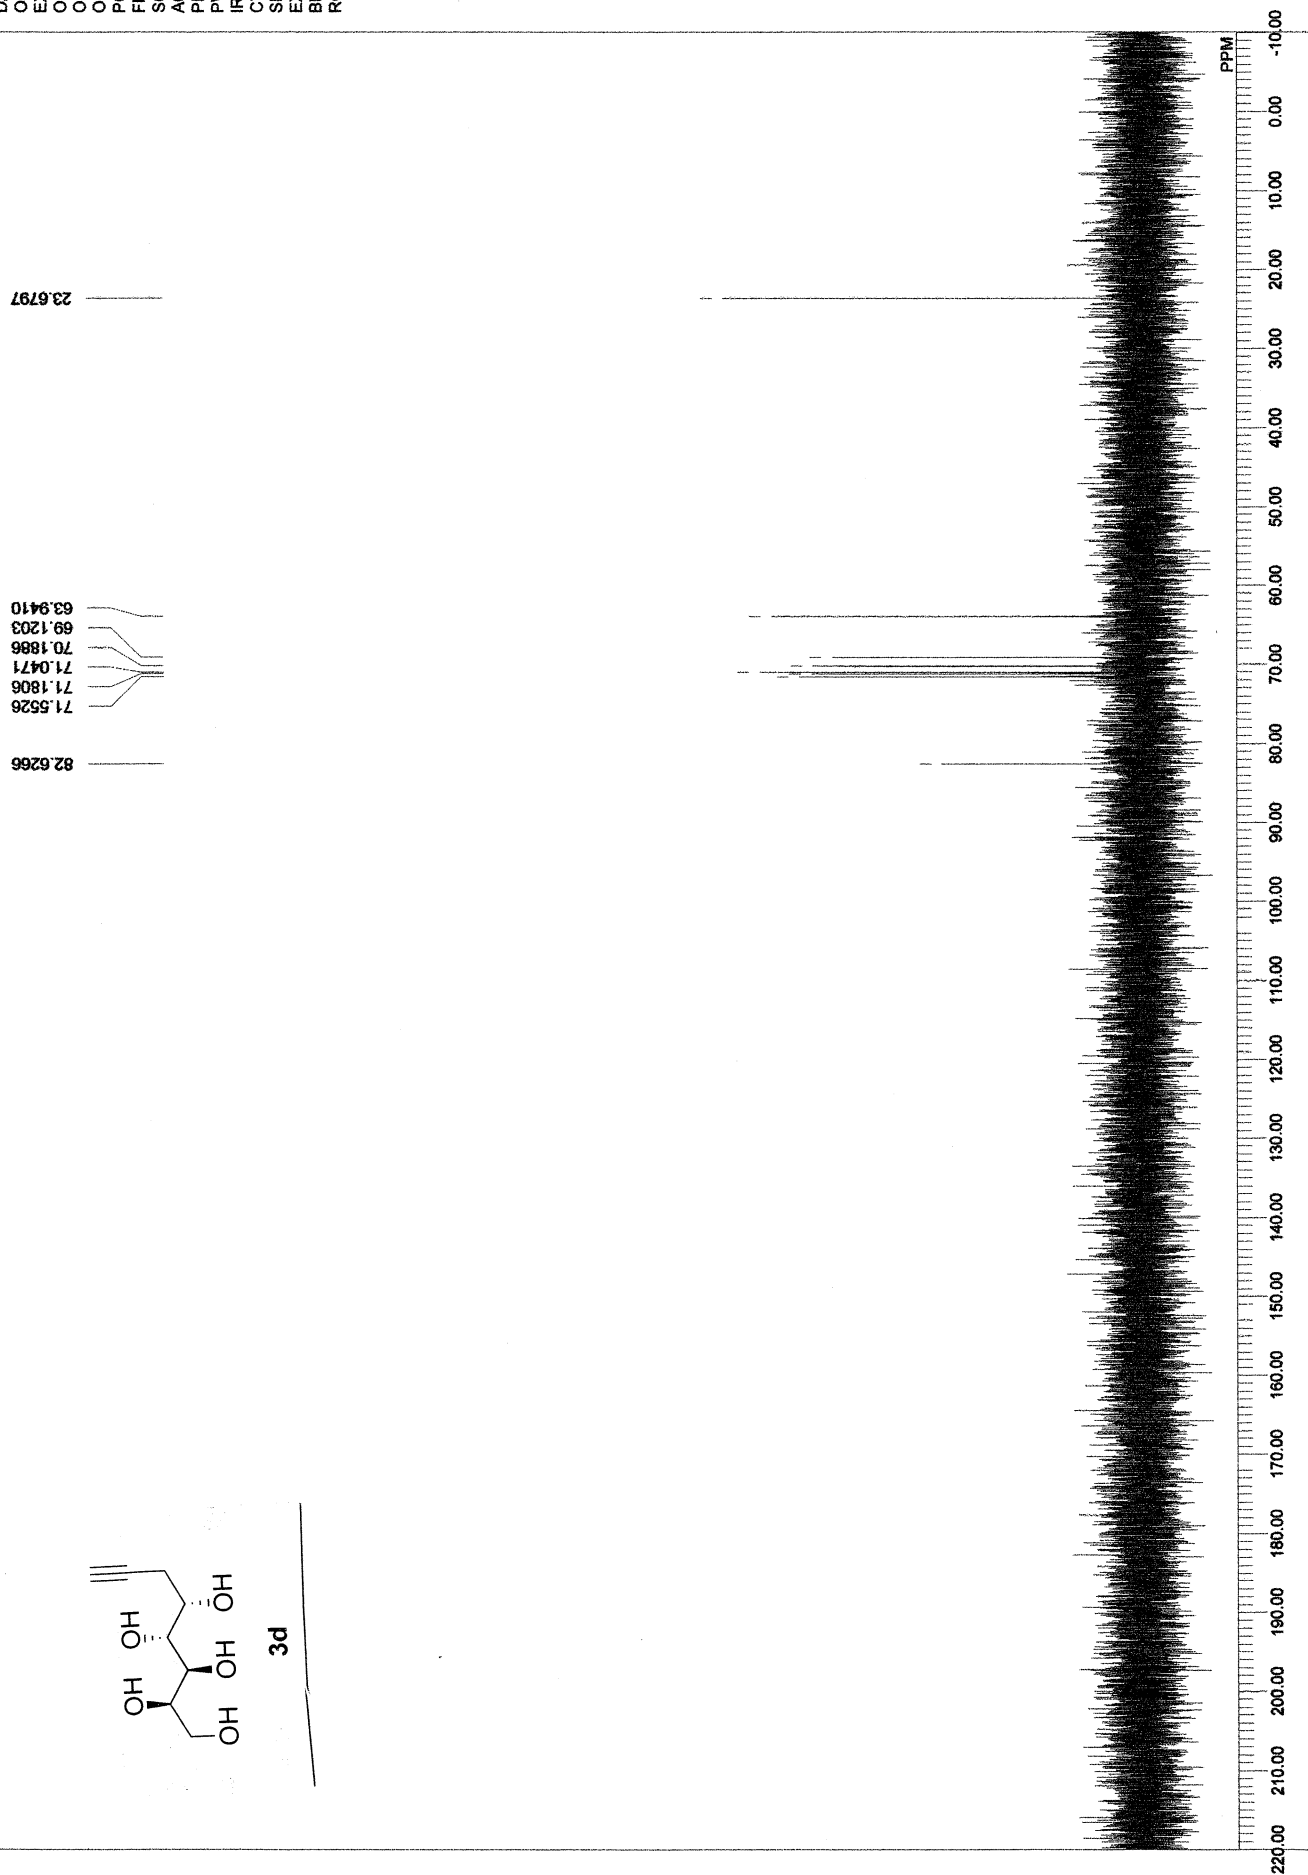

4d R-skp lyxose alkyne.als

DFILE  
 COMNT  
 DATIM  
 OBNUC  
 EXMOD  
 OBFRQ  
 OBSET  
 OBFIN  
 POINT  
 FREQU  
 SCANS  
 ACQTM  
 PD  
 PW1  
 IRNUC  
 CTEMP  
 SLVNT  
 EXREF  
 BF  
 RGAIN

2015-06-15 15:57:01  
 1H  
 proton.jxp  
 500.16 MHz  
 2.41 KHz  
 6.01 Hz  
 13107  
 7507.51 Hz  
 6  
 1.7459 sec  
 5.0000 sec  
 5.55 usec  
 1H  
 21.0 C  
 D2O  
 4.65 ppm  
 0.12 Hz  
 30

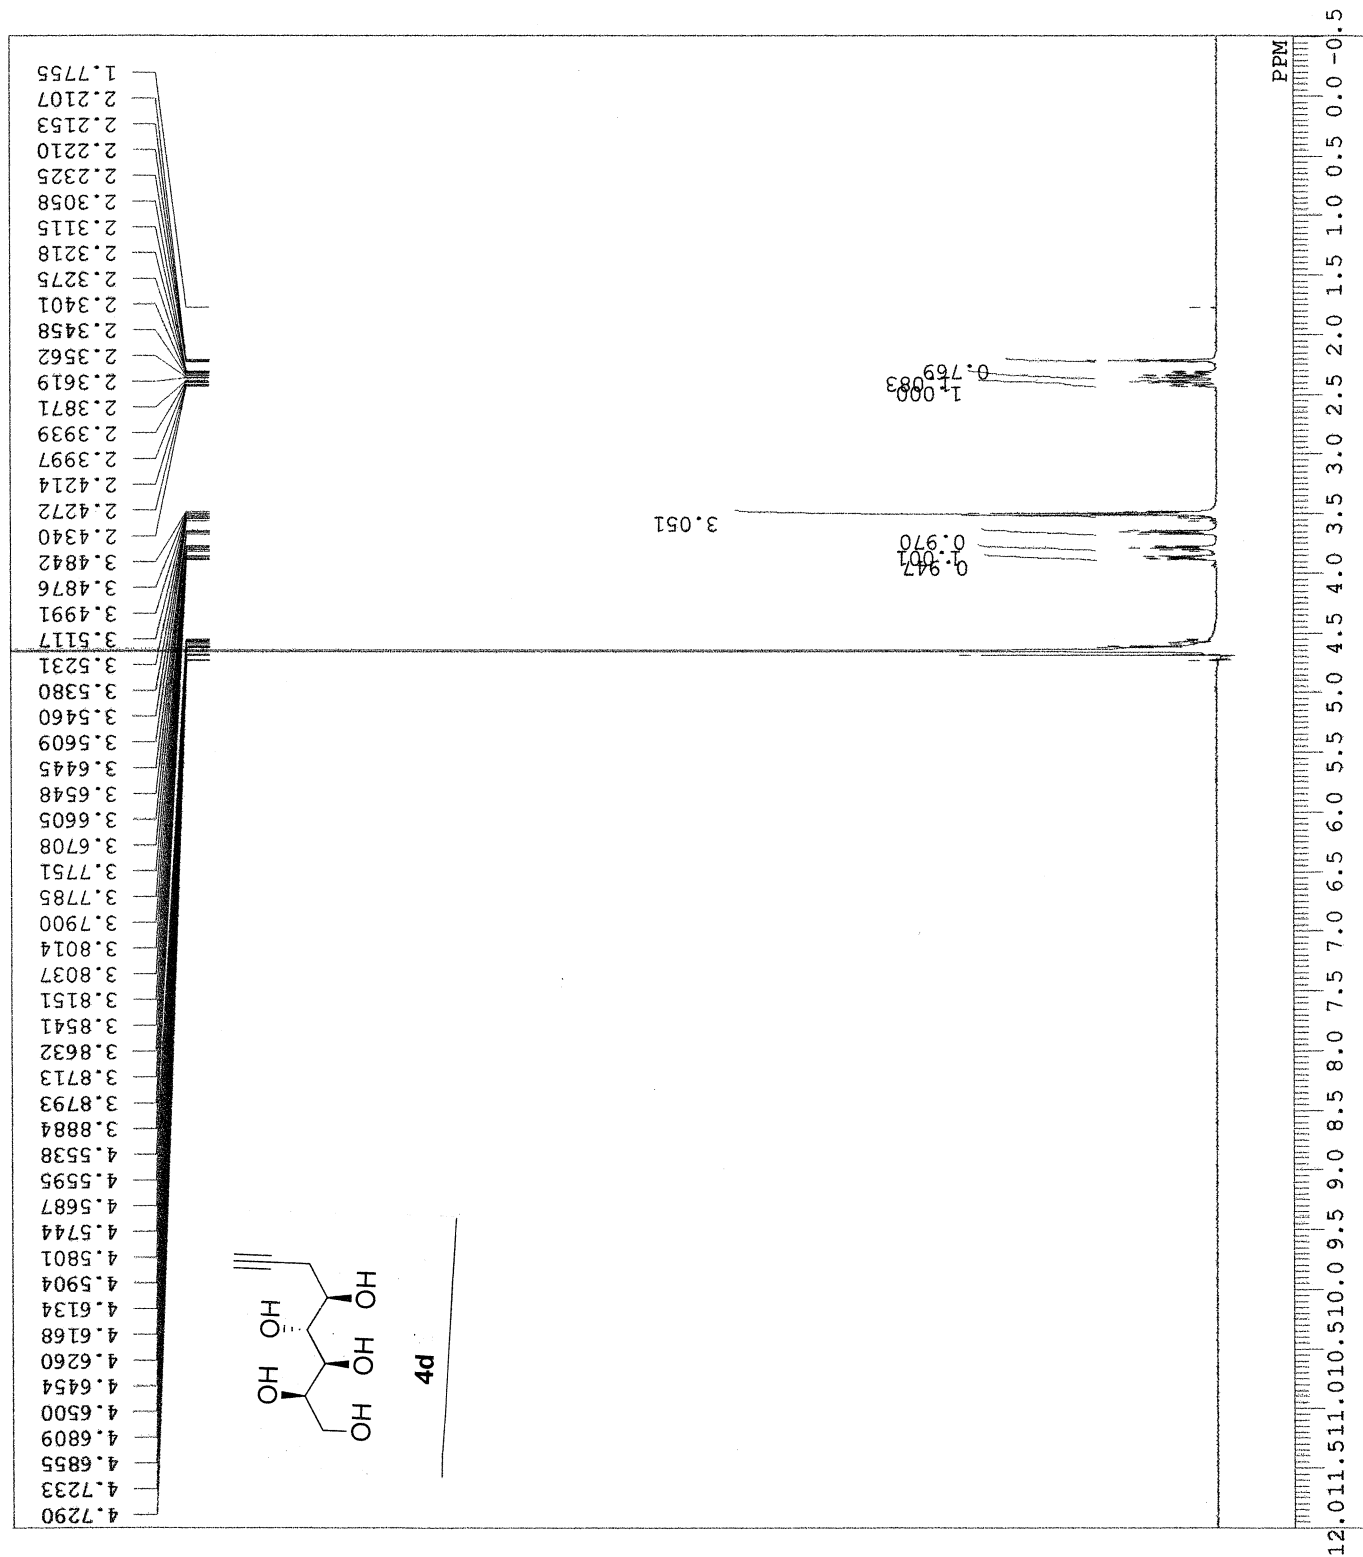

DFILE 4d R-SKP PGF lyxose carb-1-1.jdf  
 COMNT  
 DATIM 2015-06-08 14:25:18  
 OENUC 13C  
 EXMOD carbon.jxp  
 OBFRQ 125.77 MHz  
 OBSET 7.87 KHz  
 OFIN 4.21 Hz  
 POINT 32768  
 FREQU 31446.54 Hz  
 SCANS 117  
 ACQTM 1.0420 sec  
 PD 2.0000 sec  
 PW1 3.40 usec  
 IIRNUC 1H  
 CTMP 21.6 c  
 SLVNT D2O  
 EXREF 49.50 ppm  
 BF 1.02 Hz  
 RGAIN 76

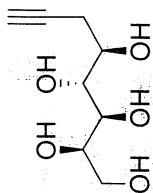

4d

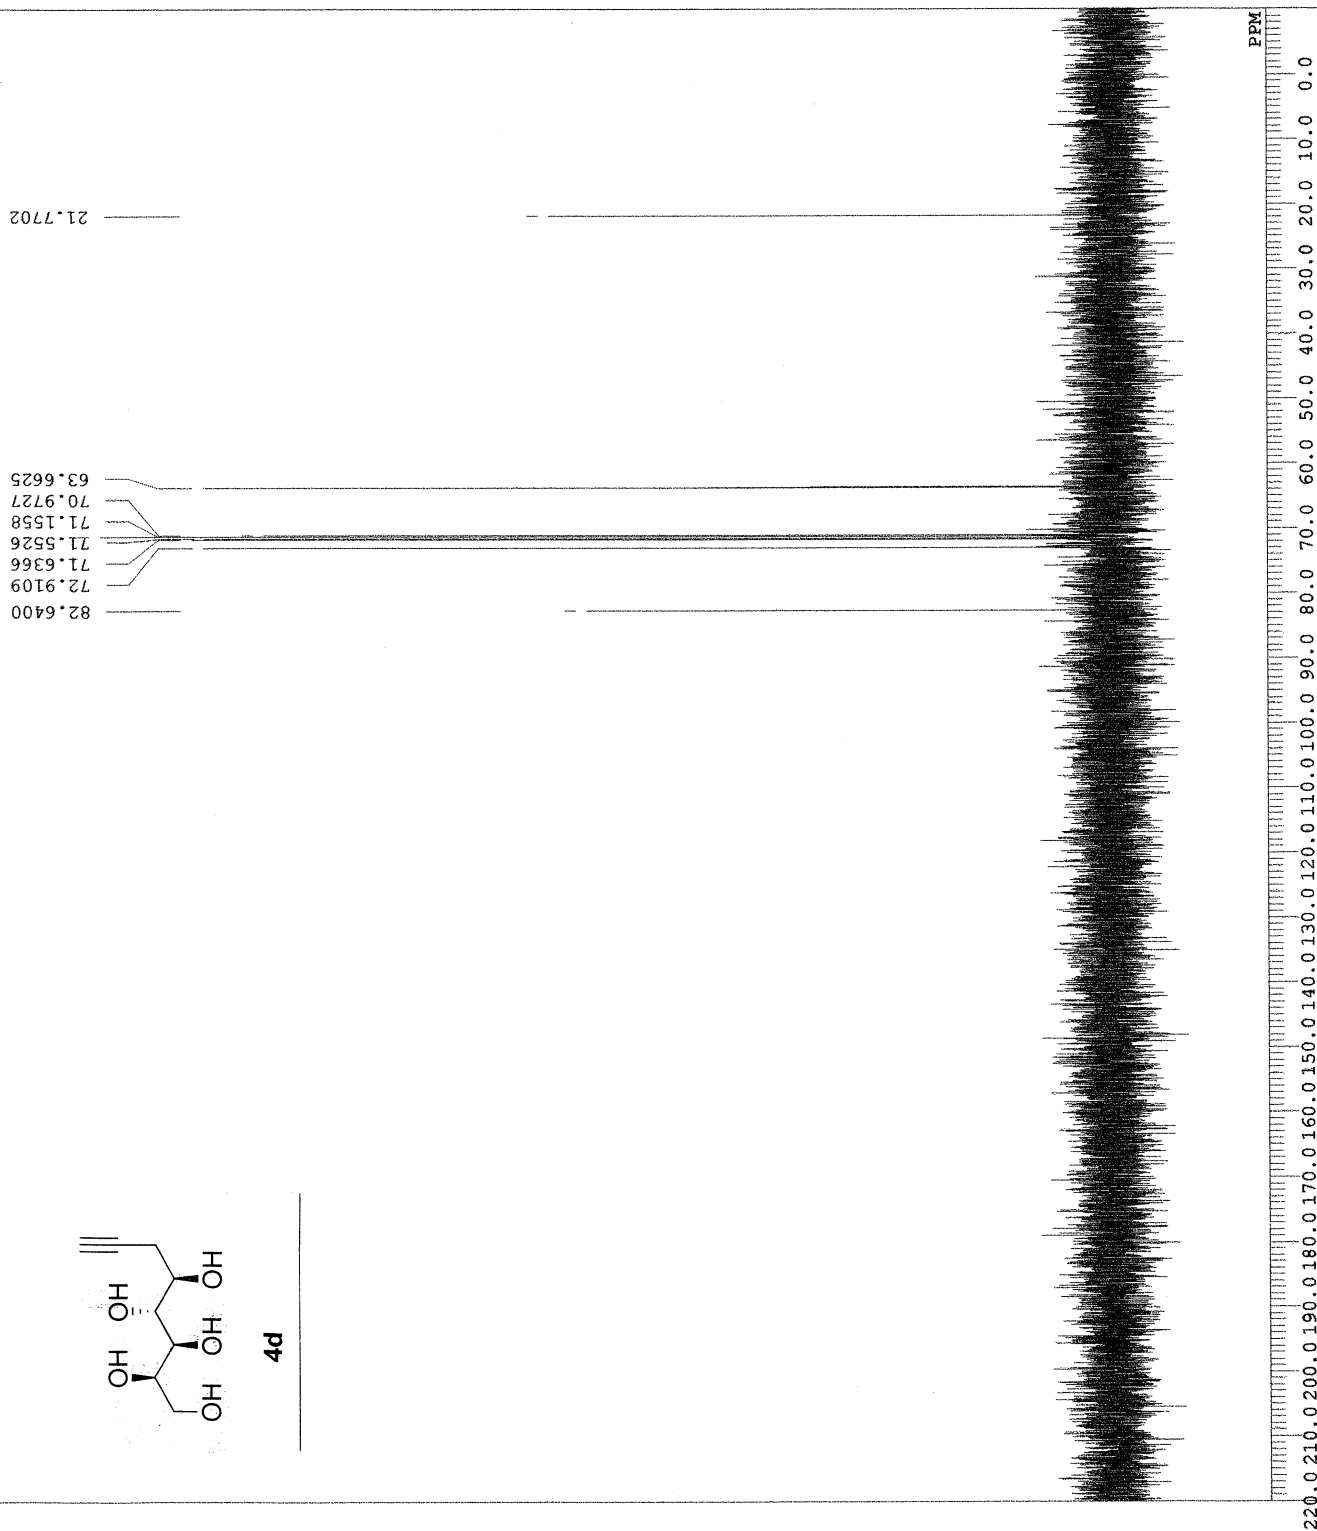

DFILE  
 COMNT  
 DATIM  
 OBNUC  
 EXMOD  
 OBFRQ  
 OBSET  
 OBFIN  
 POINT  
 FREQU  
 SCANS  
 ACQTM  
 PD  
 PW1  
 IRNUC  
 CTEMP  
 SLVNT  
 EXREF  
 BF  
 RGAIN

3e s-skp arabinose-1-1.jdf  
 2015-07-08 16:22:18  
 1H  
 proton.jxp  
 500.16 MHz  
 2.41 KHz  
 6.01 Hz  
 16384  
 9384.38 Hz  
 6  
 1.7459 sec  
 5.0000 sec  
 5.55 usec  
 1H  
 21.2 c  
 D2O  
 4.65 ppm  
 0.12 Hz  
 30

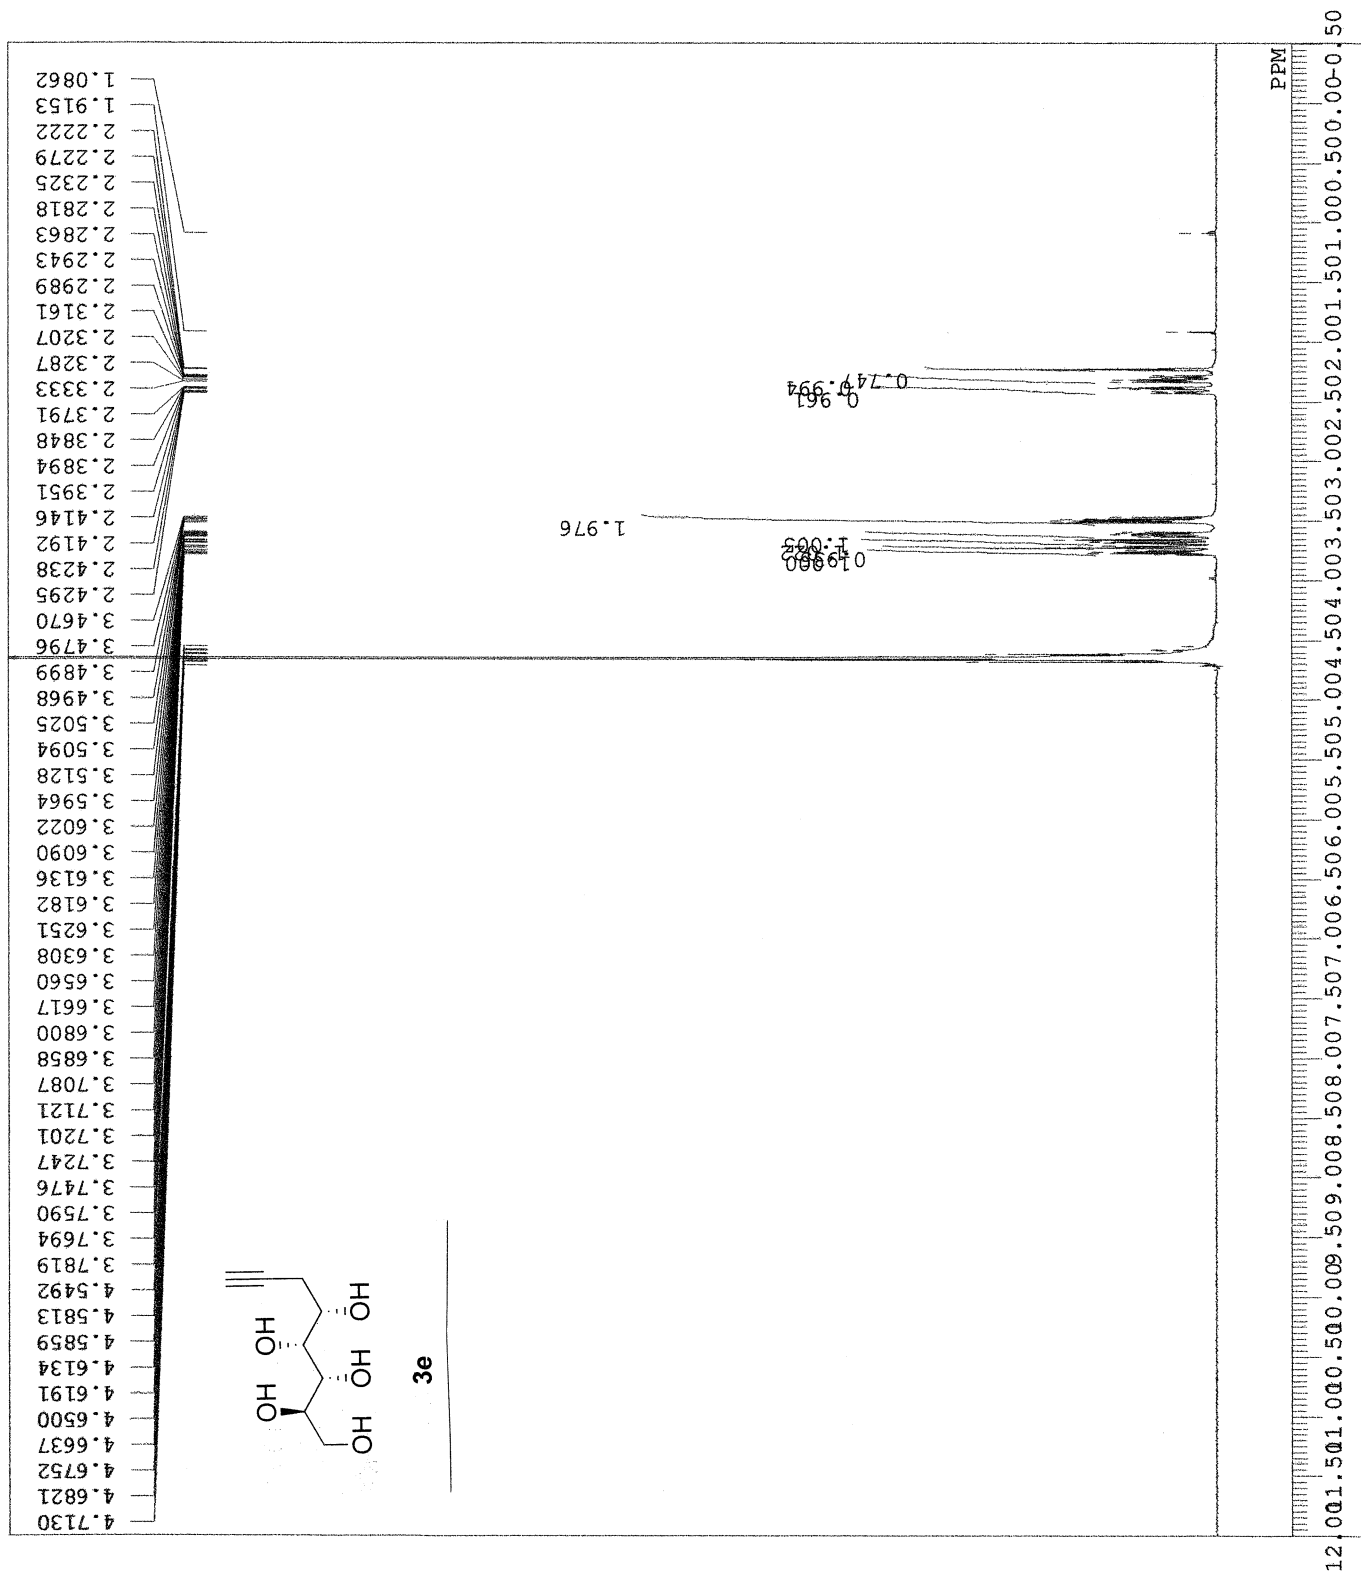

DFILE 3e s-skp arabinose.jdf  
 COMNT 2015-07-09 09:09:31  
 DATIM 13C  
 OENUC carbon.jpg  
 EXMOD 125.77 MHz  
 OBFRQ 7.87 KHz  
 OBSET 4.21 Hz  
 OBFIN 32767  
 POINT 39308.18 Hz  
 FREQU 1440  
 SCANS 0.8336 sec  
 ACQTM 2.0000 sec  
 PD 3.40 usec  
 PW1 1H  
 IRNUC 21.7 c  
 CTEMP  
 SIVNT D2O  
 EXREF 49.50 ppm  
 BF 0.12 Hz  
 RGAIN 60

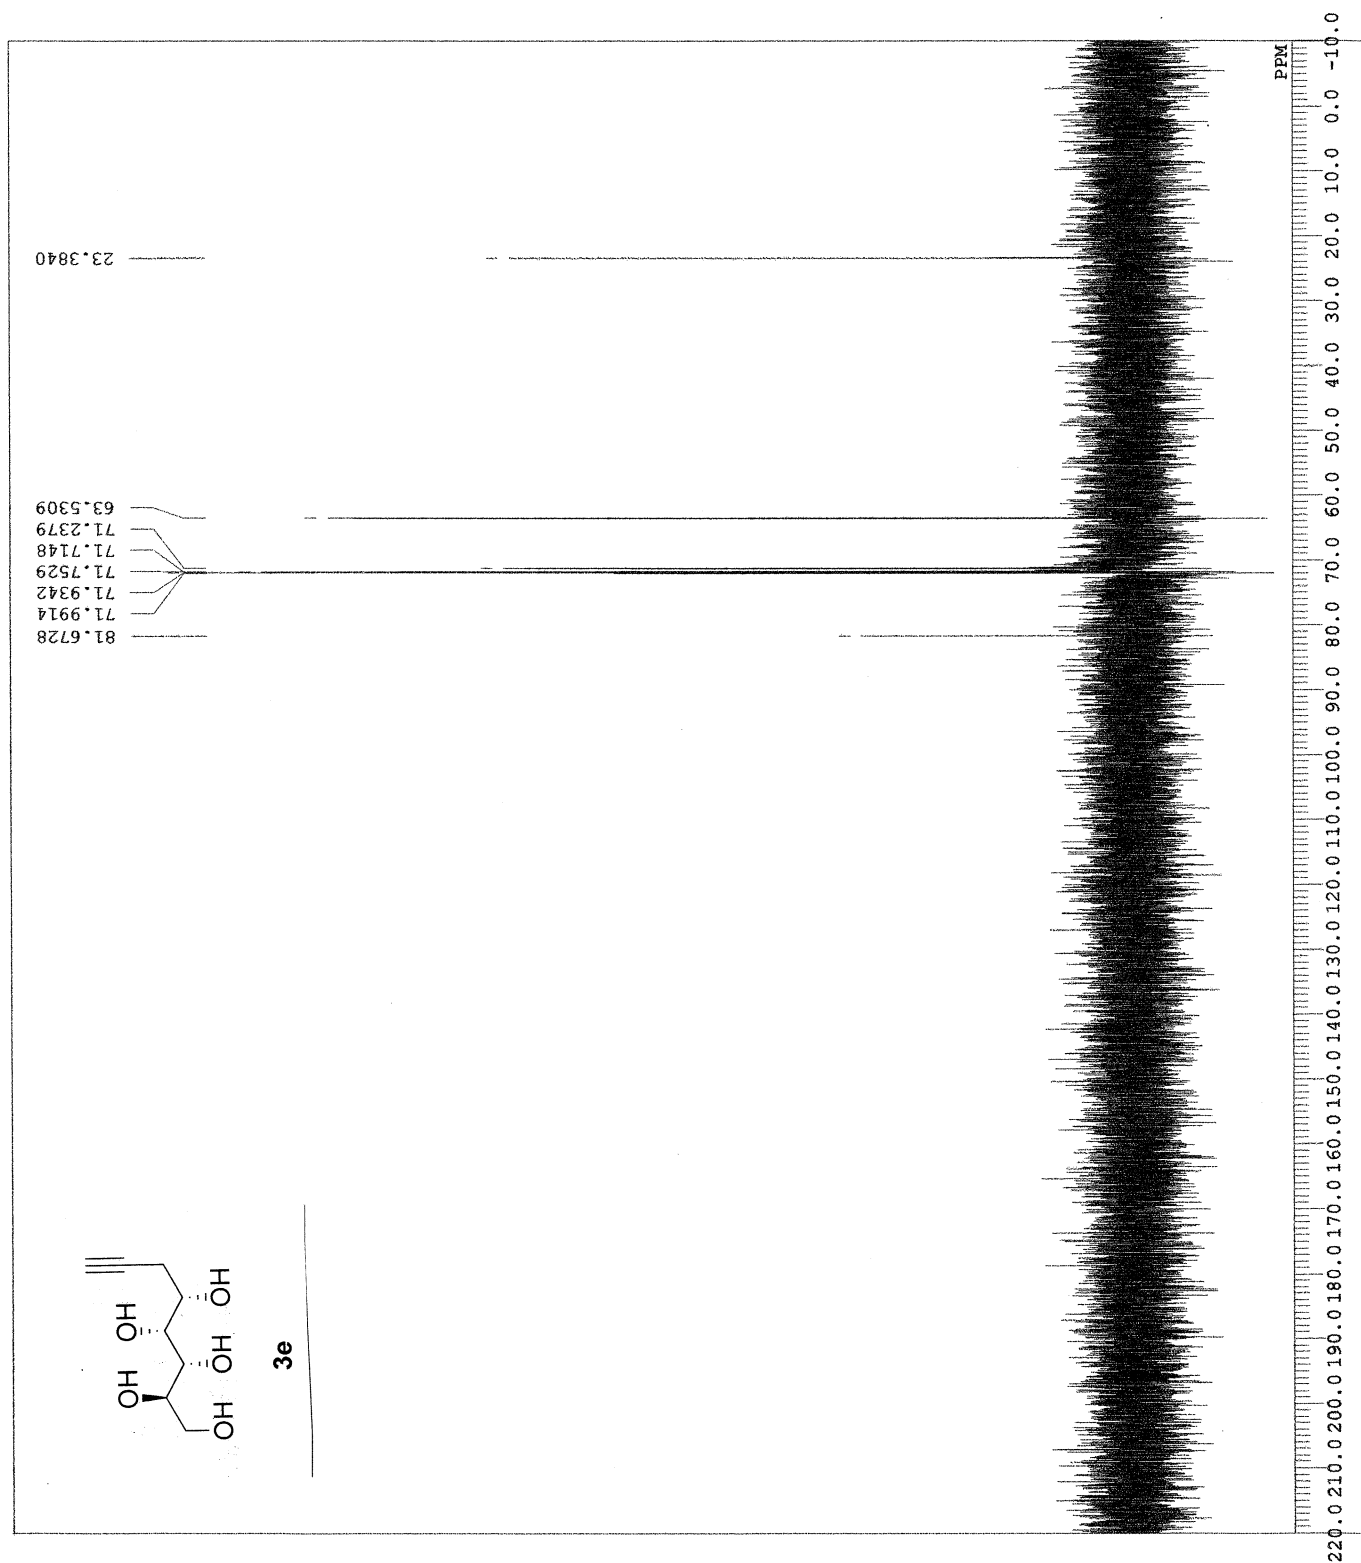

4c

wei r-skp arabinose-1-1.als

2015-07-10 09:26:50

1H

EXMOD proton.jxp

OBFRQ 500.16 MHz

OBSET 2.41 KHz

OBFIN 6.01 Hz

POINT 13107

FREQU 7507.51 Hz

SCANS 8

ACQTM 1.7459 sec

PD 5.0000 sec

PW1 5.55 usec

IRNUC 1H

CTEMP 21.4 c

SLVNT D2O

EXREF 4.65 ppm

BF 0.12 Hz

RGAIN 30

4c

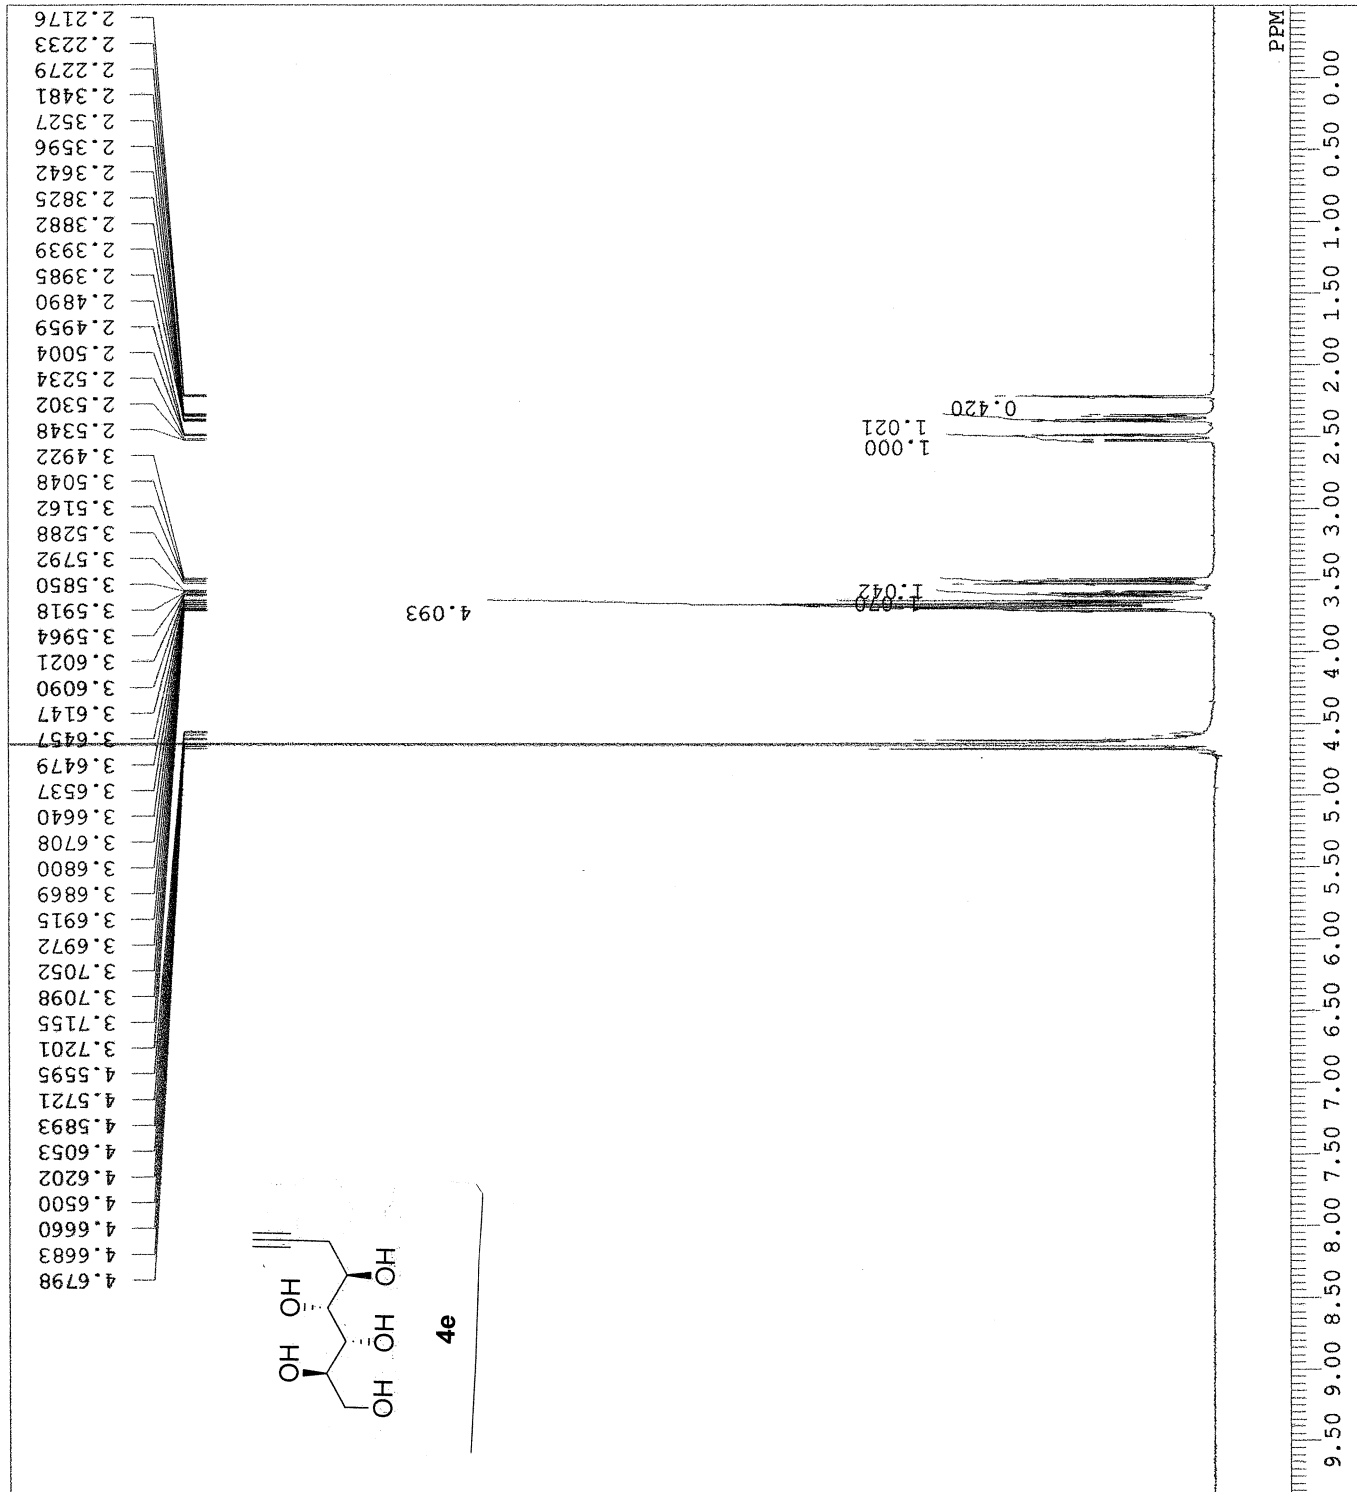

```

DEFILE wei r-skp arabinose carb-1-1.als
COMNT
DATIM 2015-07-10 09:28:20
CENUC 13C
EXMOD carbon.jpg
QBFRQ 125.77 MHz
QBSET 7.87 KHz
QEFIN 4.21 Hz
POINT 26214
FREQU 31446.54 Hz
SCANS 1323
ACQTM 0.8336 sec
PD 2.0000 sec
PW1 3.40 usec
IRNUC 1H
CTEMP 21.7 C
SLVNT D2O
EXREF 49.50 ppm
BF 0.12 Hz
RGAIN 60

```

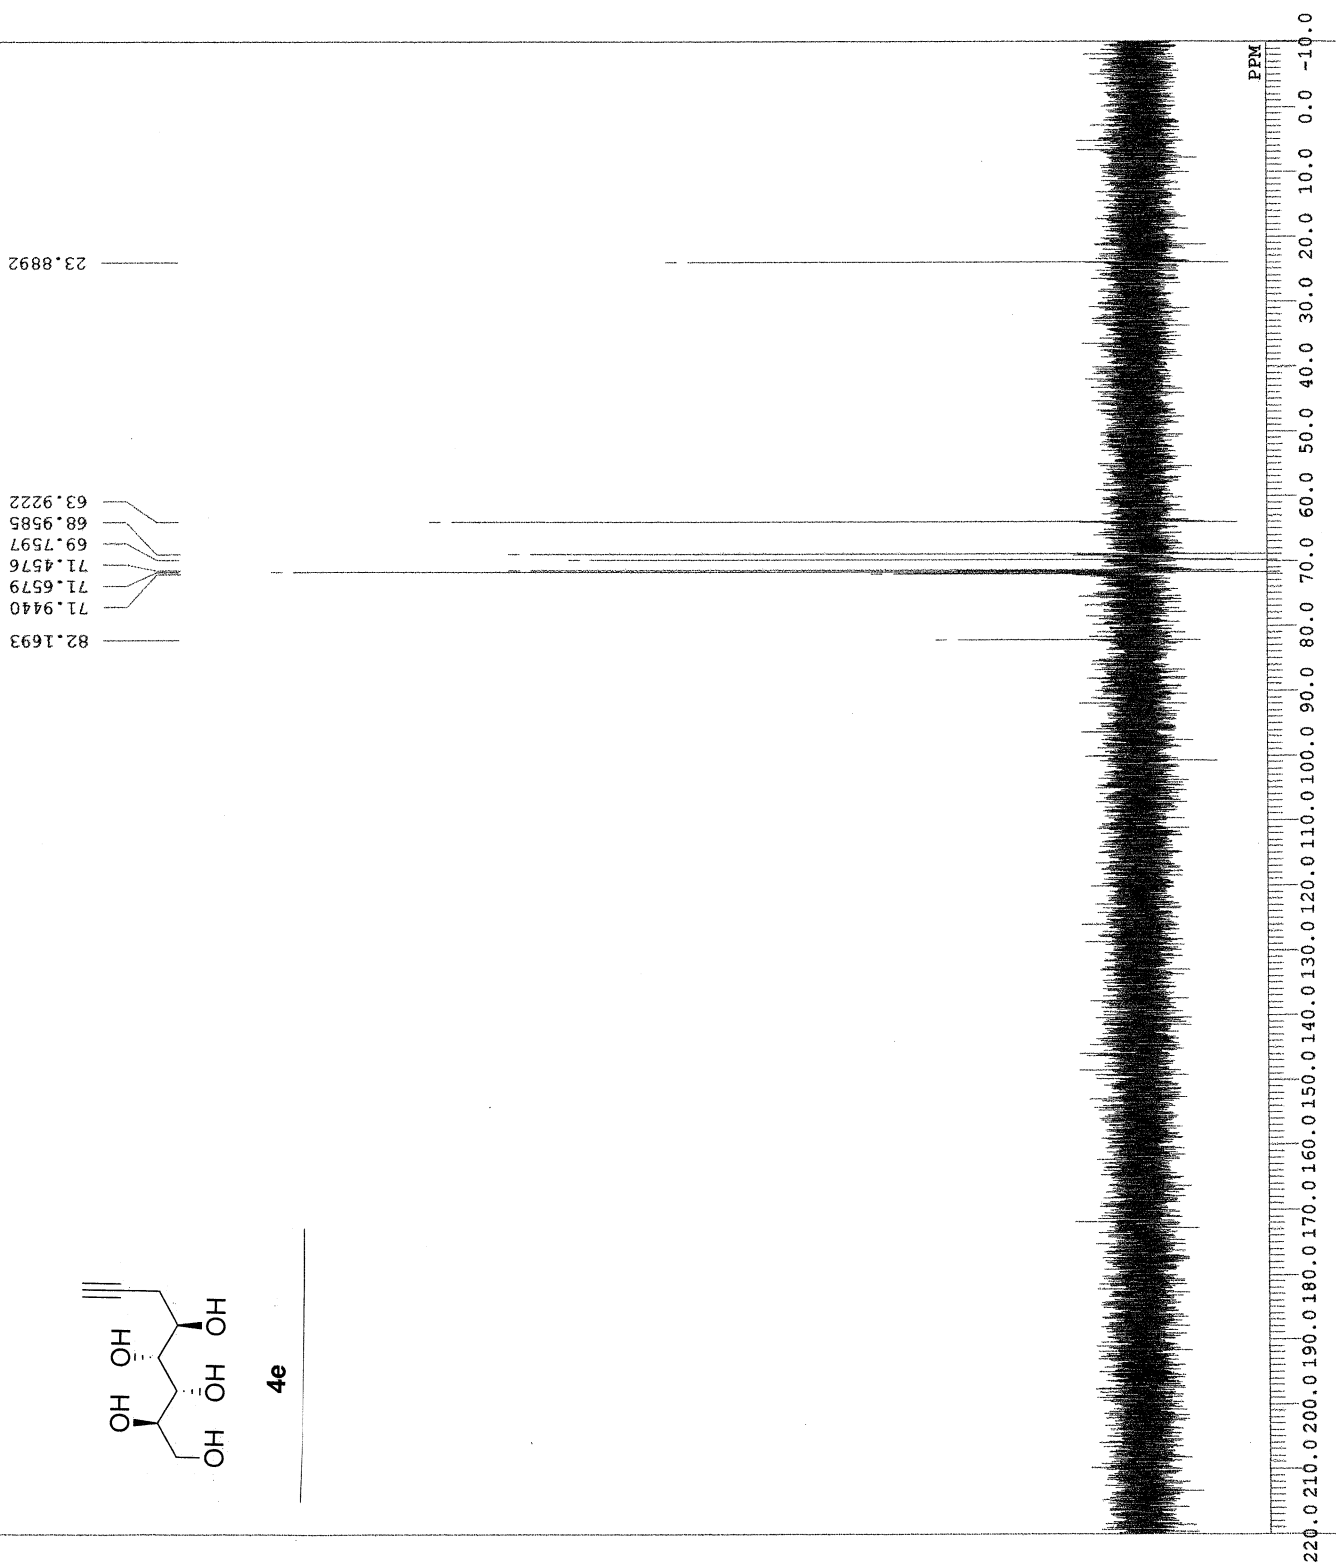

|                |               |            |
|----------------|---------------|------------|
| wsf            | 928-6-1-1.jdf |            |
| DATE           | 07-07-2015    | 18:52:06   |
| COMM           |               |            |
| DANIC          | 1H            |            |
| GAMIN          | EMXD          | proton_jyp |
| ORIGIN         | OBSQ          | 391.78 MHz |
| OBLEN          | GBST          | 6.51 KHz   |
| POINT          | OBSN          | 3.24 Hz    |
| FREQU          | PNTD          | 16384 Hz   |
| SCANS          | FREQ          | 7352.94 Hz |
| ACQUM          | SCAT          | 14         |
| PD             | 2ACC          | 2.282 sec  |
| FW1            | 5.000         | sec        |
| TMRUC          | 1H            | 4.99 usec  |
| CTEMP          |               | 21.5 c     |
| SIVNT          | D2O           |            |
| KEREF          |               | 0.00 ppm   |
| B <sub>f</sub> |               | 1.20 Hz    |
| RGAIN          |               | 38         |

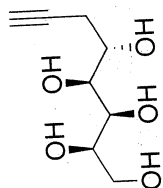

3f

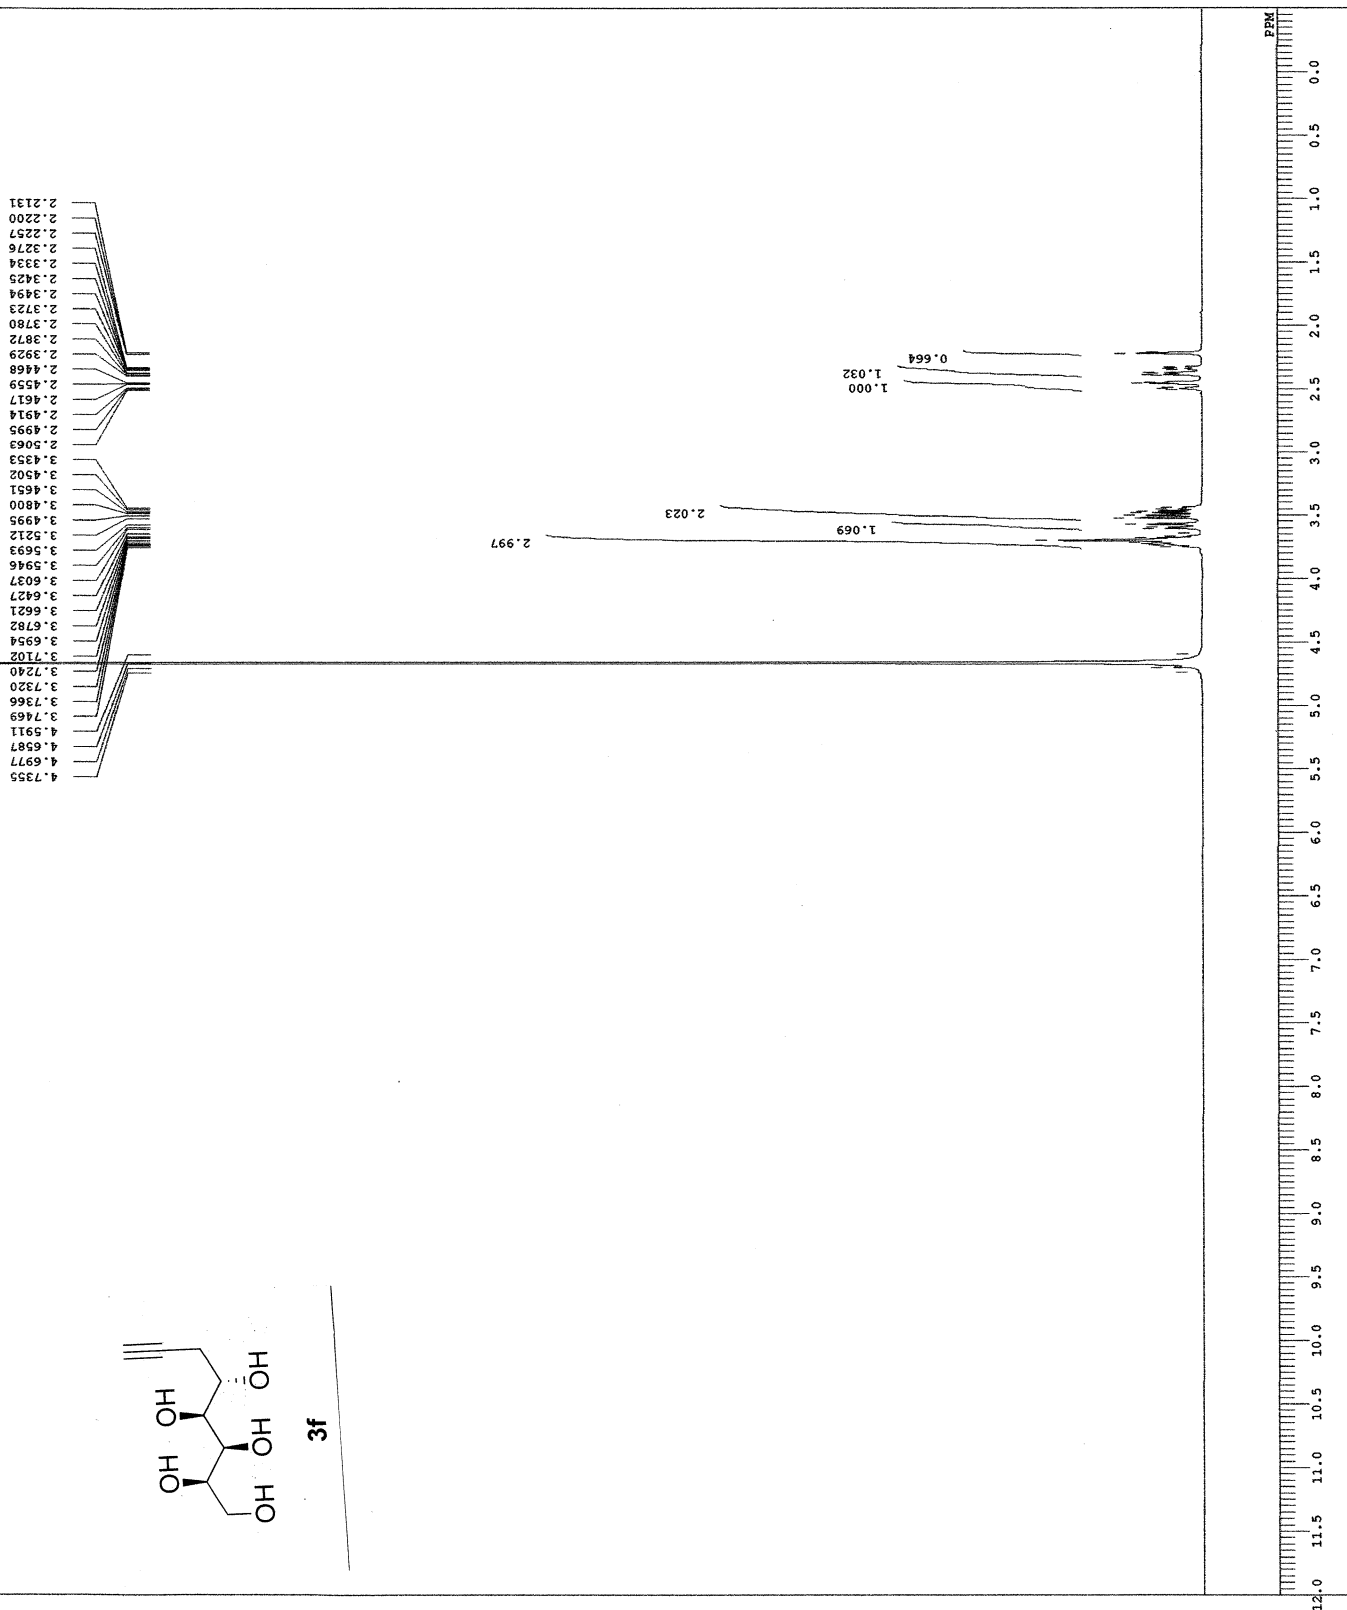



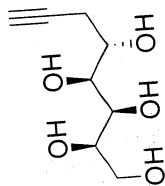

3f

DFILE wei 928-6 carb-1-1.jdf  
 COMINT 07-07-2015 18:54:28  
 DATM 13C  
 OBNUC carbon-13p  
 EXMOD 98.52 MHz  
 OFREQ 4.64 KHz  
 OBSF 8.74 Hz  
 POINT 32767  
 FREQU 30788.18 Hz  
 SCANS 1700  
 ACQTM 1.0643 sec  
 PD 2.0000 sec  
 PW1 3.16 usec  
 IRNUC 1H  
 CTEMP 21.7 c  
 SLVNT D2O  
 EXREF 49.50 ppm  
 BF 0.12 Hz  
 RGAIN 60

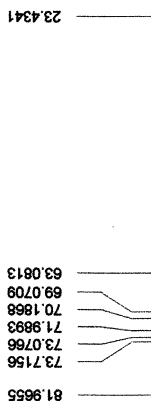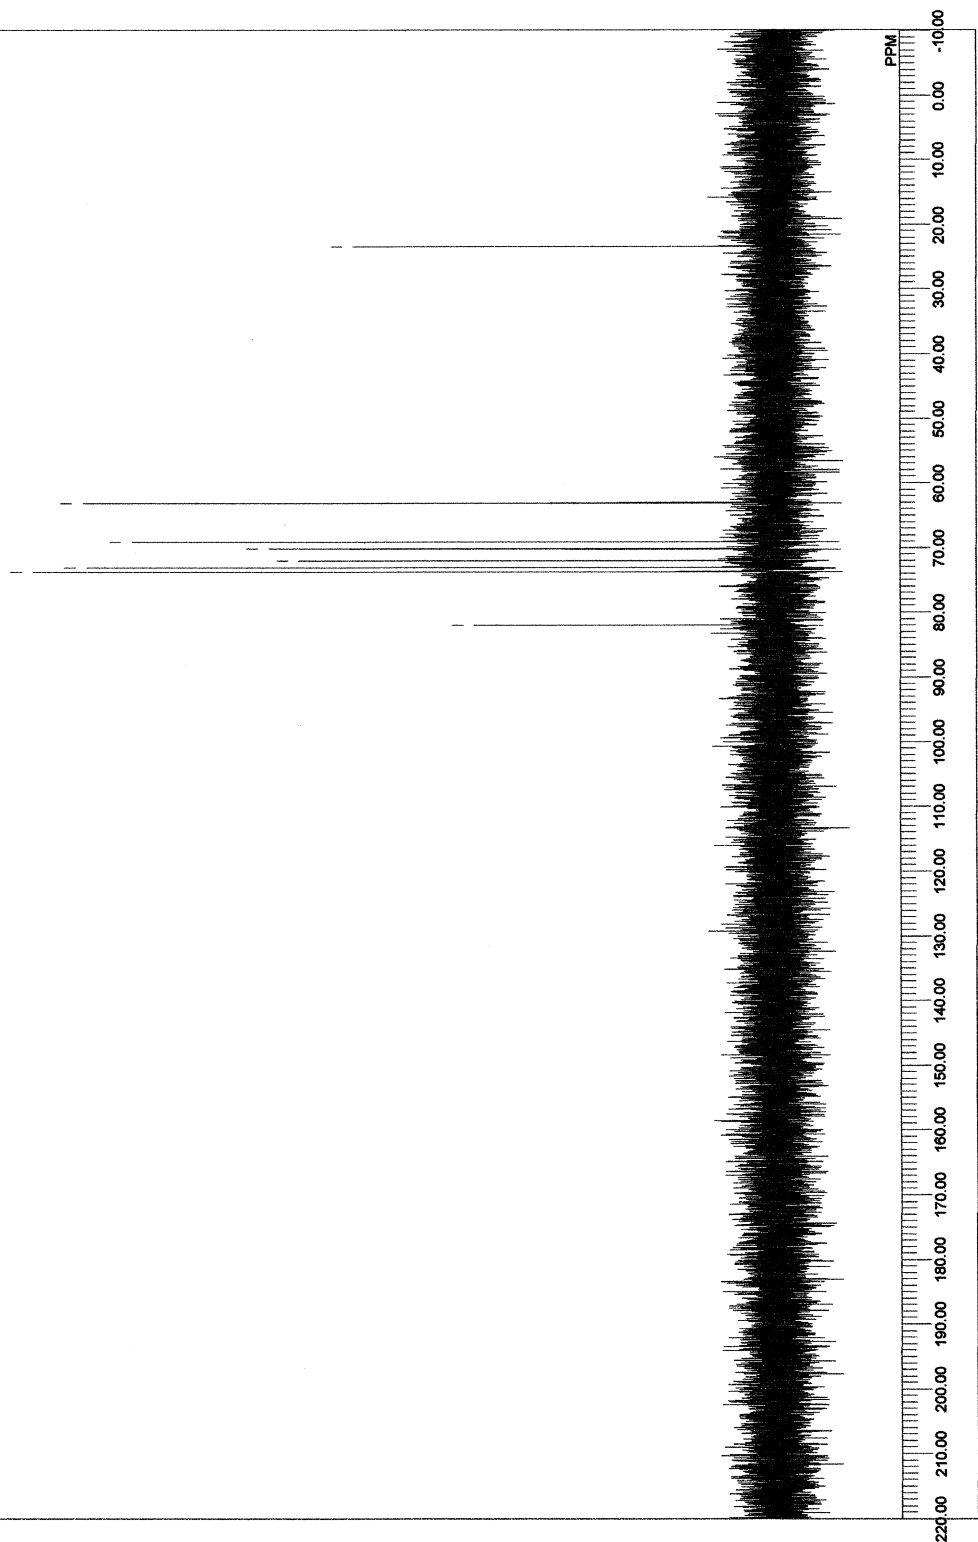

DFILE wei r-skp xylose new-1-1.jdf

COMNT  
DATIM 2015-09-08 23:09:05  
OENUC 1H  
EXMOD proton.jxp  
OBFRO 500.16 MHz  
OBSET 2.41 KHz  
OBFIN 6.01 Hz  
POINT 16384  
FREQU 9384.38 Hz  
SCANS 10  
ACQTM 1.7459 sec  
PD 5.0000 sec  
PW1 5.55 usec  
IRNUC 1H  
CTEMP 21.3 c  
SLVNT D2O  
EXREF 4.65 ppm  
BF 1.20 Hz  
RGAIN 34

4.7485  
4.7221  
4.7015  
4.6718  
4.6500  
4.6168  
4.5882  
4.3442  
3.8026  
3.7934  
3.6915  
3.6846  
3.6079  
3.5999  
3.5930  
3.5838  
3.5632  
3.5552  
3.5071  
3.4934  
3.4842  
3.4705  
2.4146  
2.4031  
2.3711  
2.3596  
2.3379  
2.3241  
2.2382

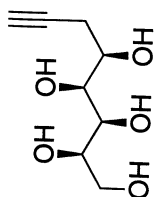

4f

3.131

1.000  
1.082  
1.206

2.115

0.314

PPM

12.011.511.010.510.09.5 9.0 8.5 8.0 7.5 7.0 6.5 6.0 5.5 5.0 4.5 4.0 3.5 3.0 2.5 2.0 1.5 1.0 0.5 0.0 -0.5

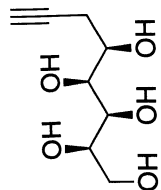

4f

DFILE wei r-skip xylose new carb-1-1.jdf  
 COMINT  
 DATIM 2015-09-08 23:11:04  
 OBNUC 13C  
 EXMOD carbon.jxp  
 OBFREQ 125.77 MHz  
 OBSET 7.87 KHz  
 OBFIN 4.21 Hz  
 POINT 32767  
 FREQU 39308.18 Hz  
 SCANS 12000  
 ACQTM 0.8336 sec  
 PD 2.0000 sec  
 PW1 3.40 usec  
 1H  
 IRNUC 21.3 c  
 D2O  
 SLVNT  
 EXREF 49.50 ppm  
 BF 0.12 Hz  
 RGAIN 60

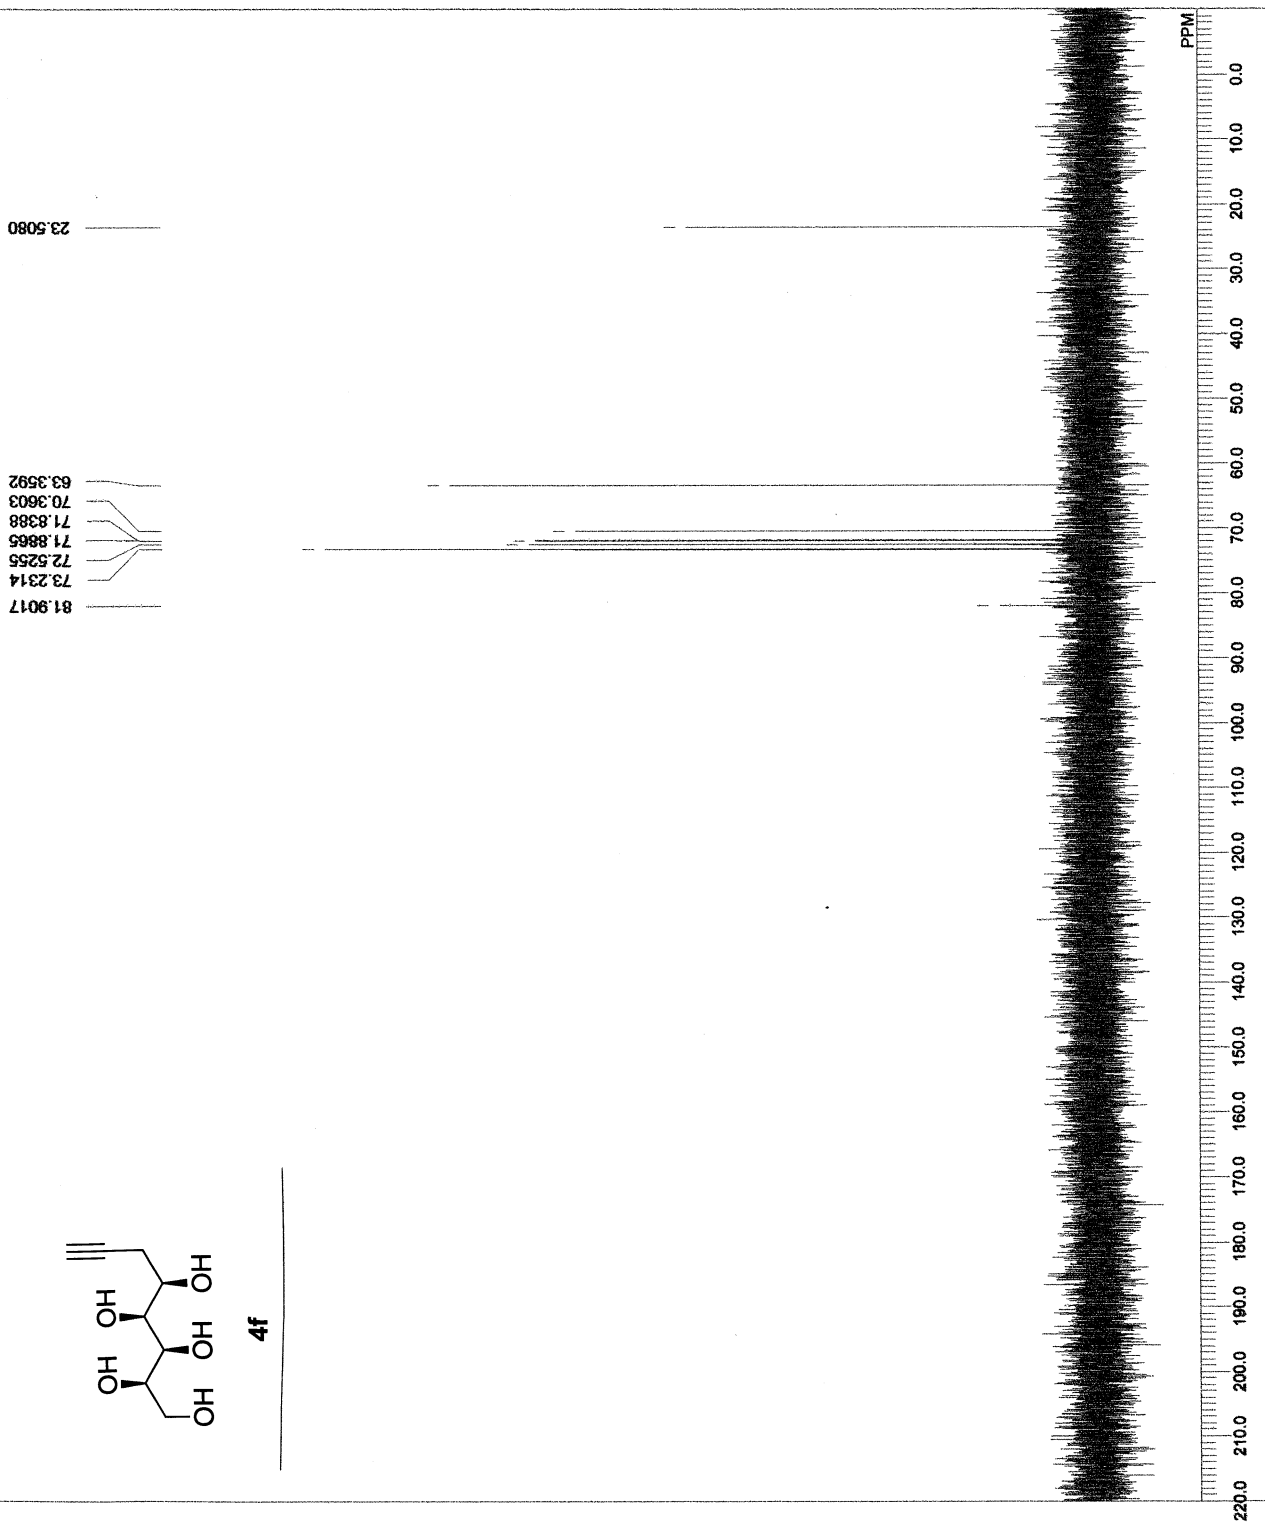

3g s-skp 2-d-ribose alkyne-1-

DFILE  
COMNT  
DATIM  
OBNUC  
EXMOD  
OBFRQ  
OBSET  
OBFIN  
POINT  
FREQU  
SCANS  
ACQTM  
PD  
PW1  
IRNUC  
CTEMP  
SLVNT  
EXREF  
BF  
RGAIN

2015-07-18 14:40:56  
1H  
proton.jxp  
500.16 MHz  
2.41 KHz  
6.01 Hz  
13107  
7507.51 Hz  
10  
1.7459 sec  
5.0000 sec  
5.55 usec  
1H  
21.2 c  
CD3OD  
3.30 ppm  
0.12 Hz  
32

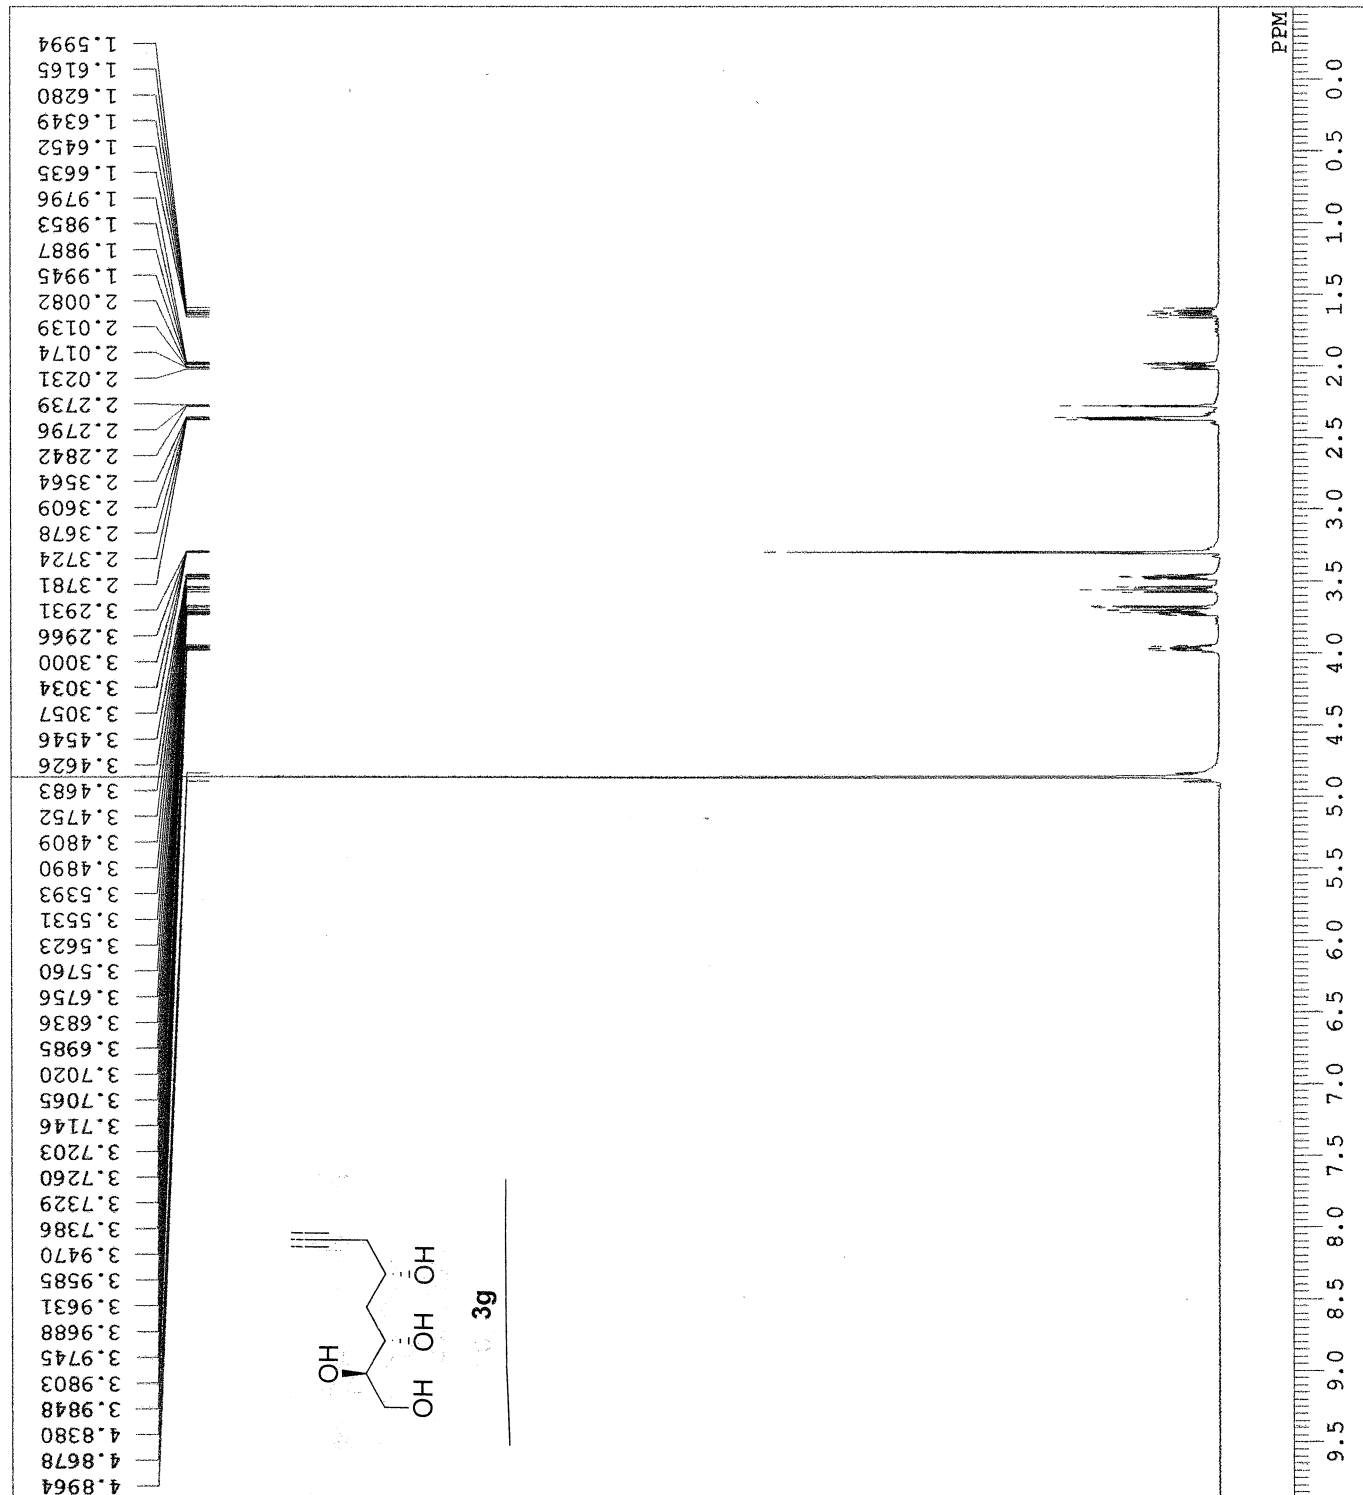

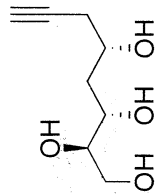

3g

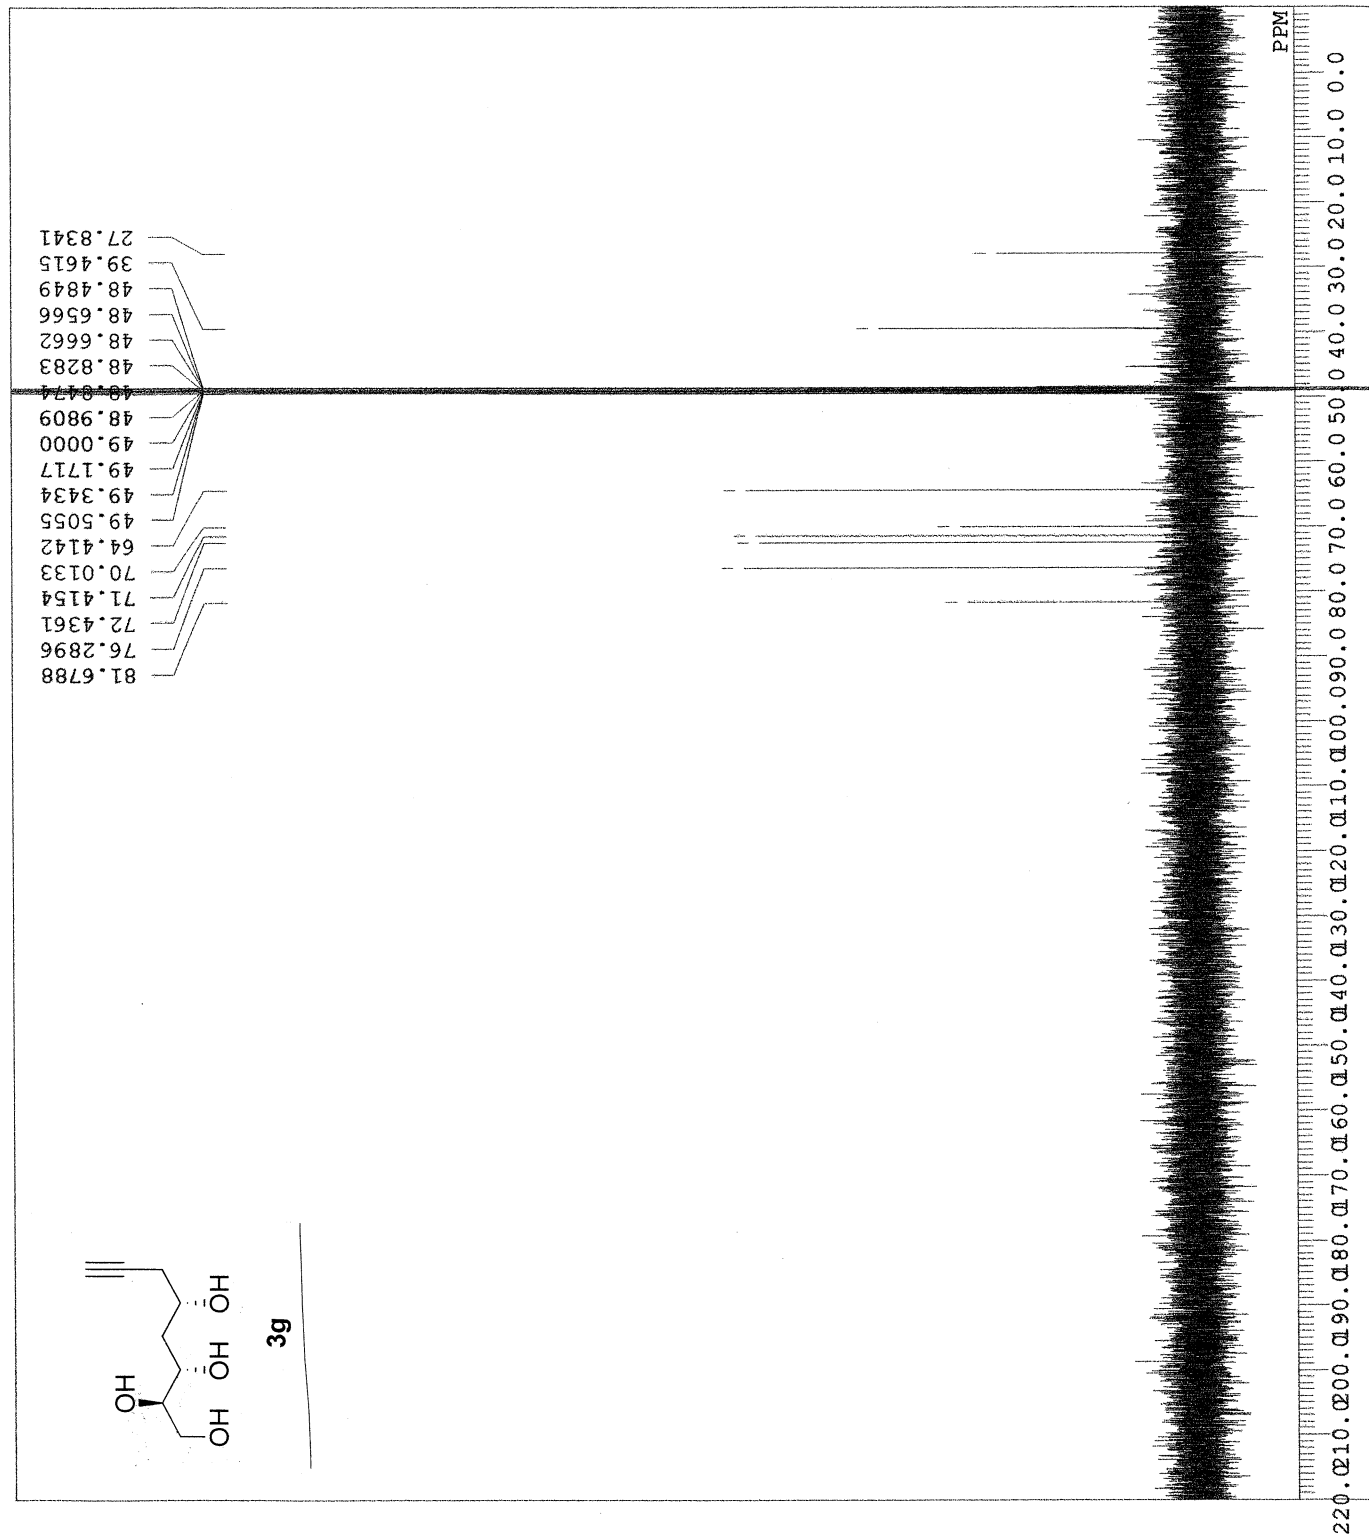

3g s-skp 2-d-ribose alkyne ca.  
 DFILE COMNT  
 DATIM 2015-07-18 14:42:39  
 OBNUC 13C  
 EXMOD carbon.jpg  
 OBFRO 125.77 MHz  
 OBSET 7.87 KHz  
 OBFIN 4.21 Hz  
 POINT 26214  
 FREQU 31446.54 Hz  
 SCANS 424  
 ACQTM 0.0000 sec  
 PD 2.0000 sec  
 PW1 3.40 usec  
 IRNUC 1H  
 CTEMP 21.7 c  
 SLVNT CD3OD  
 EXREF 49.00 ppm  
 BF 0.12 Hz  
 RGAIN 60

DFILE 4g r-skp 2-d-ribose-1-1.jdf  
 COMNT 2015-07-17 18:10:32  
 DATIM 1H  
 OBNUC proton.jpg  
 EXMOD 500.16 MHz  
 OBFRQ 2.41 KHz  
 OBSET 6.01 Hz  
 OBFIN 16384  
 POINT 9384.38 Hz  
 FREQU 8  
 SCANS 1.7459 sec  
 ACQTM 5.0000 sec  
 PD 5.55 usec  
 FW1 1H  
 IRNUC 21.3 c  
 CTEMP CD3OD  
 SLVNT 3.30 ppm  
 EXREF 0.12 Hz  
 BF 30  
 RGAIN

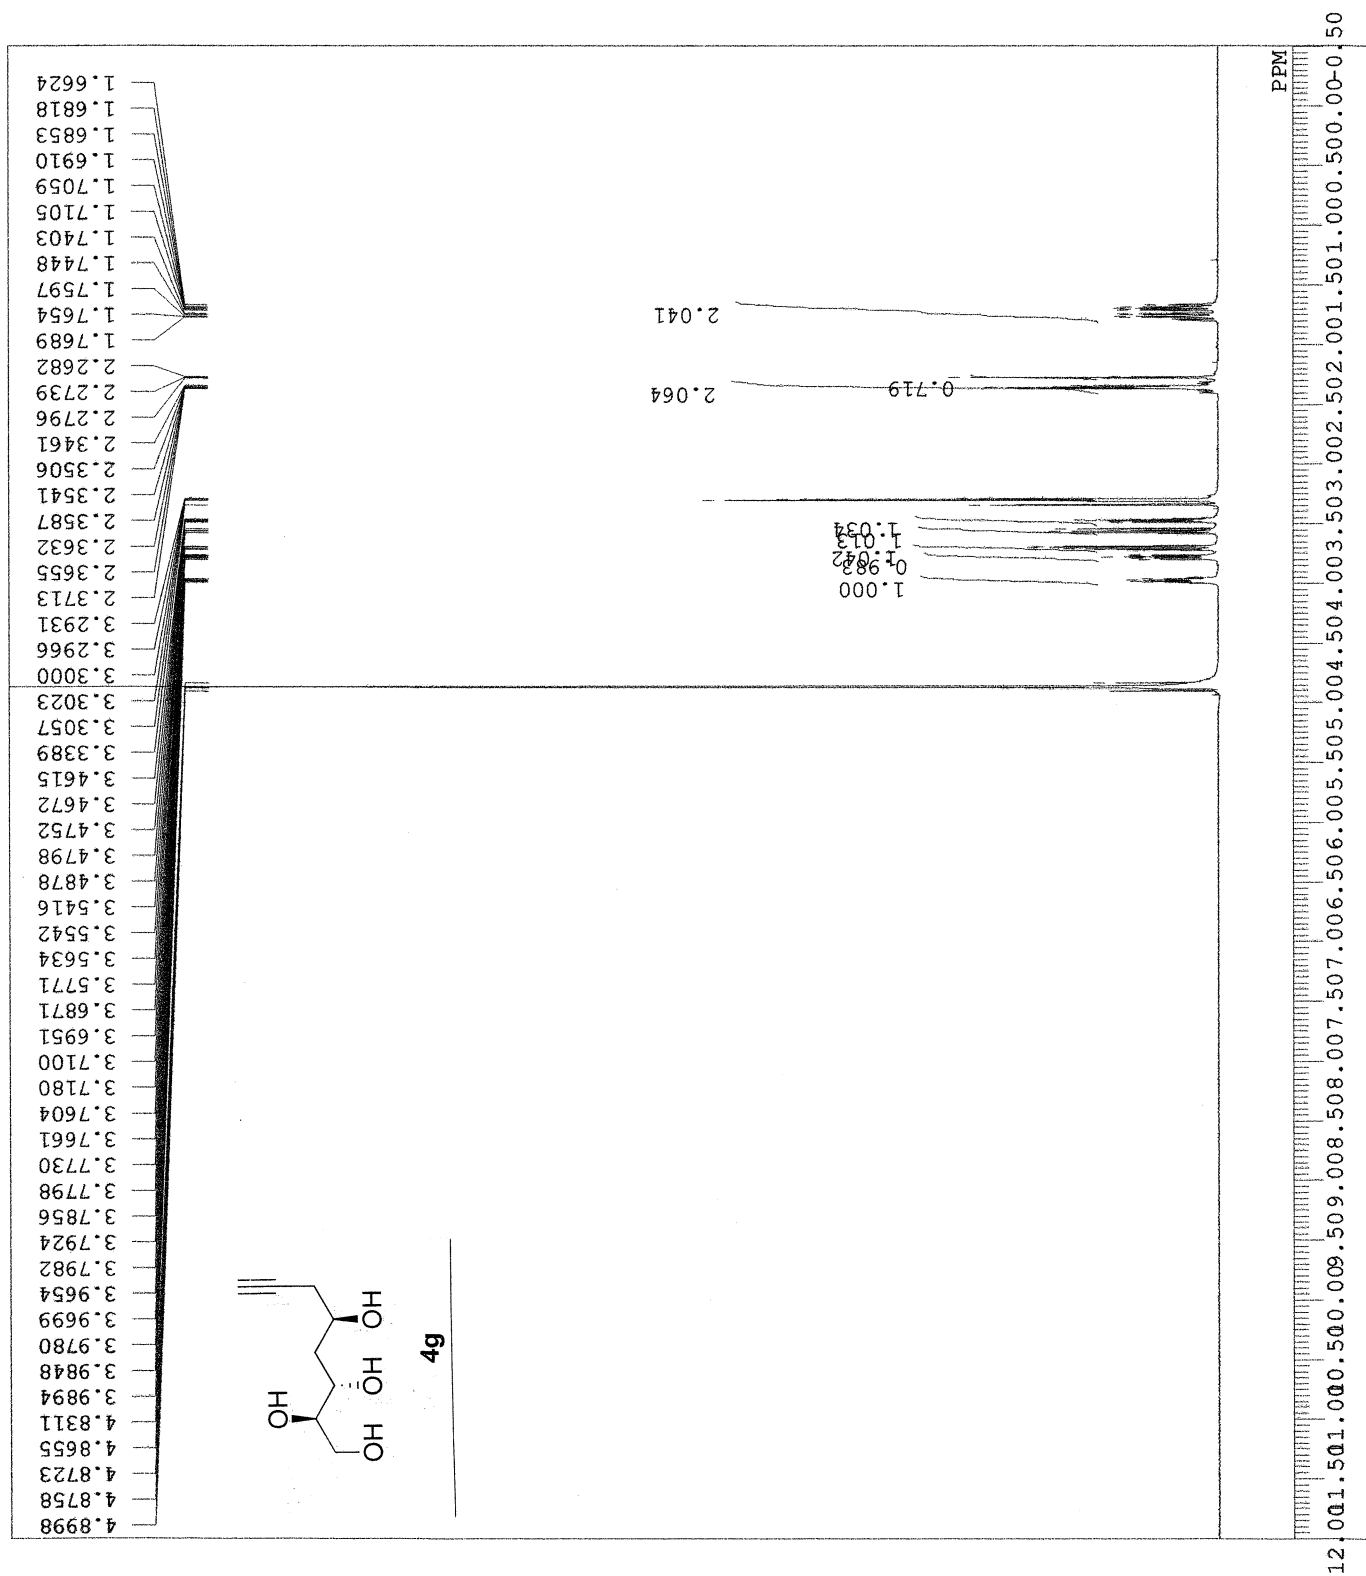

4g r-skp 2-d-ribose carb-1-1.  
 DFILE 4g r-skp 2-d-ribose carb-1-1.  
 COMNT 2015-07-17 18:12:02  
 DATIM 13C  
 OBNUC carbon,ixp  
 EXMOD 125.77 MHz  
 OBFRQ 7.87 KHz  
 OBSET 4.21 Hz  
 OBFIN 26214  
 POINT 31446.54 Hz  
 FREQU 668  
 SCANS 0.8336 sec  
 ACQTM 2.0000 sec  
 PD 3.40 usec  
 PW1 1H  
 IRNUC 21.7 c  
 CTEMP CD3OD  
 SLVNT 49.00 ppm  
 EXREF 0.12 Hz  
 BF 60  
 RGAIN

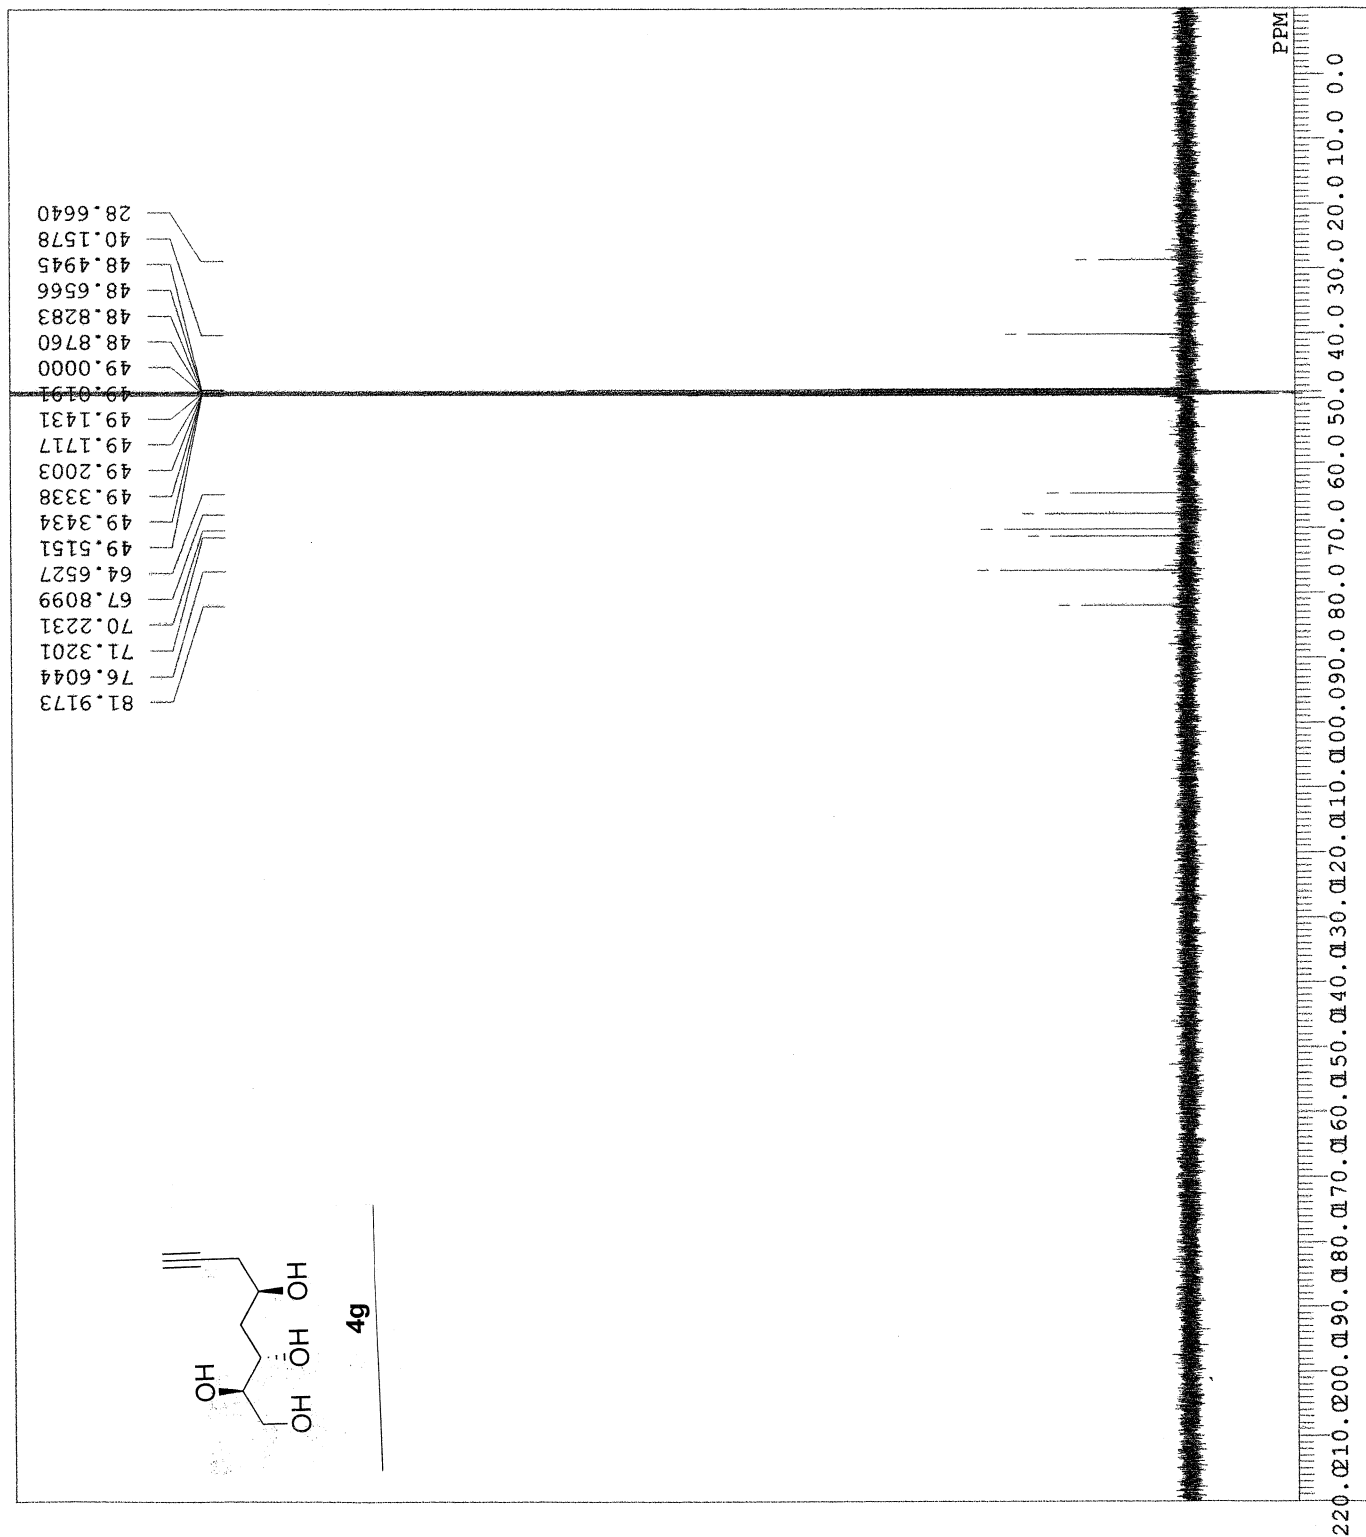

wei s-skip 2-d-galactose-1-1.jdf

2015-07-28 08:57:21

DFILE  
COMINT  
DATIM  
OBNUC  
EXMOD  
OBFRQ  
OBSET  
OBFIN  
POINT  
FREQU  
SCANS  
ACQTM  
PD  
PW1  
IRNUC  
CTEMP  
SLVNT  
EXREF  
BF  
RGAIN

1H  
proton.jxp  
500.16 MHz  
2.41 KHz  
6.01 Hz  
16384  
9384.38 Hz  
6  
1.7459 sec  
5.0000 sec  
5.55 usec  
1H  
21.2 c  
D2O  
4.65 ppm  
0.12 Hz  
30

C:\Documents and Settings\user1\My Documents\Goussell\propagation\data collection\NATURE DATA\final one\proton\wei s-skip 2-d-galactose-1-1.jdf

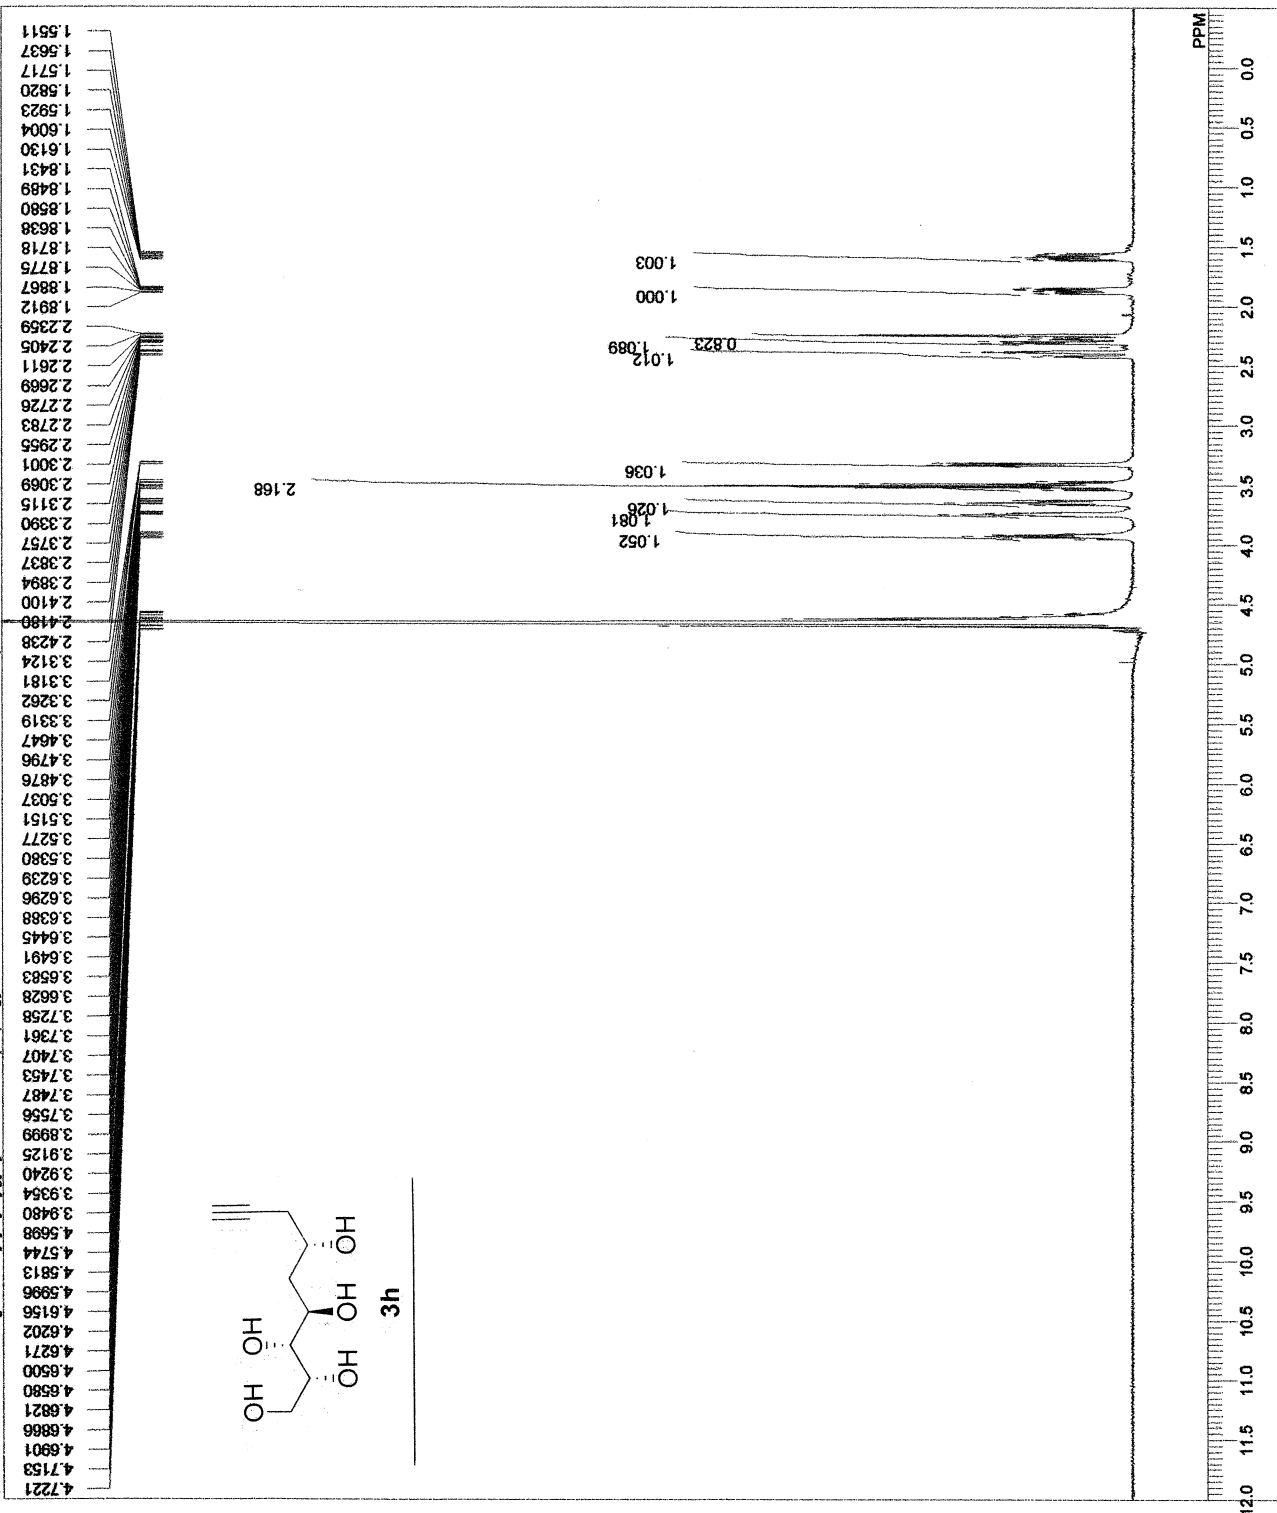



```

DFFILE wei s-skp 2-d-galactose carb-
COMNT 2015-09-09 21:18:11
DATIM 13C
OBNUC carbon.jxp
EXMOD 125.77 MHz
OBFRQ 7.87 KHz
OBSET 4.21 Hz
OBFIN 32767
POINT 39308.18 Hz
FREQU 1533
SCANS 0.8336 sec
ACQTM 2.0000 sec
PD 3.40 usec
PW1 1H
IRNUC 20.7 c
CTEMP 49.50 ppm
SLVNT D2O
EXREF 1.20 Hz
BF 60
RGAIN

```

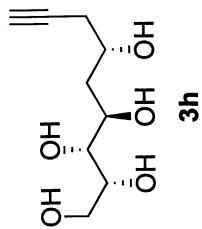

82.4836  
74.3760  
71.8865  
71.2379  
68.2524  
66.8121  
63.7312

39.2081  
27.5809

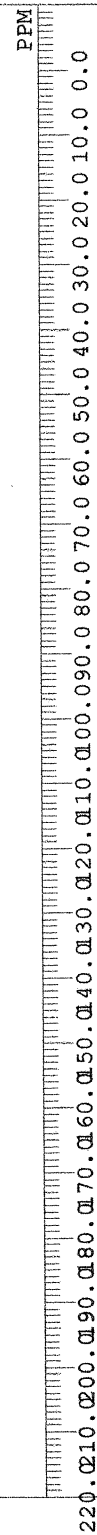

r-skp 2-d-galactose alkyne-1-1.jdf  
 2015-07-27 10:20:13  
 1H  
 proton.jxp  
 500.16 MHz  
 2.41 KHz  
 6.01 Hz  
 16384  
 9384.38 Hz  
 11  
 1.7459 sec  
 5.0000 sec  
 5.55 usec  
 1H  
 21.0 c  
 CD3OD  
 3.30 ppm  
 0.12 Hz  
 30  
 RGAIN

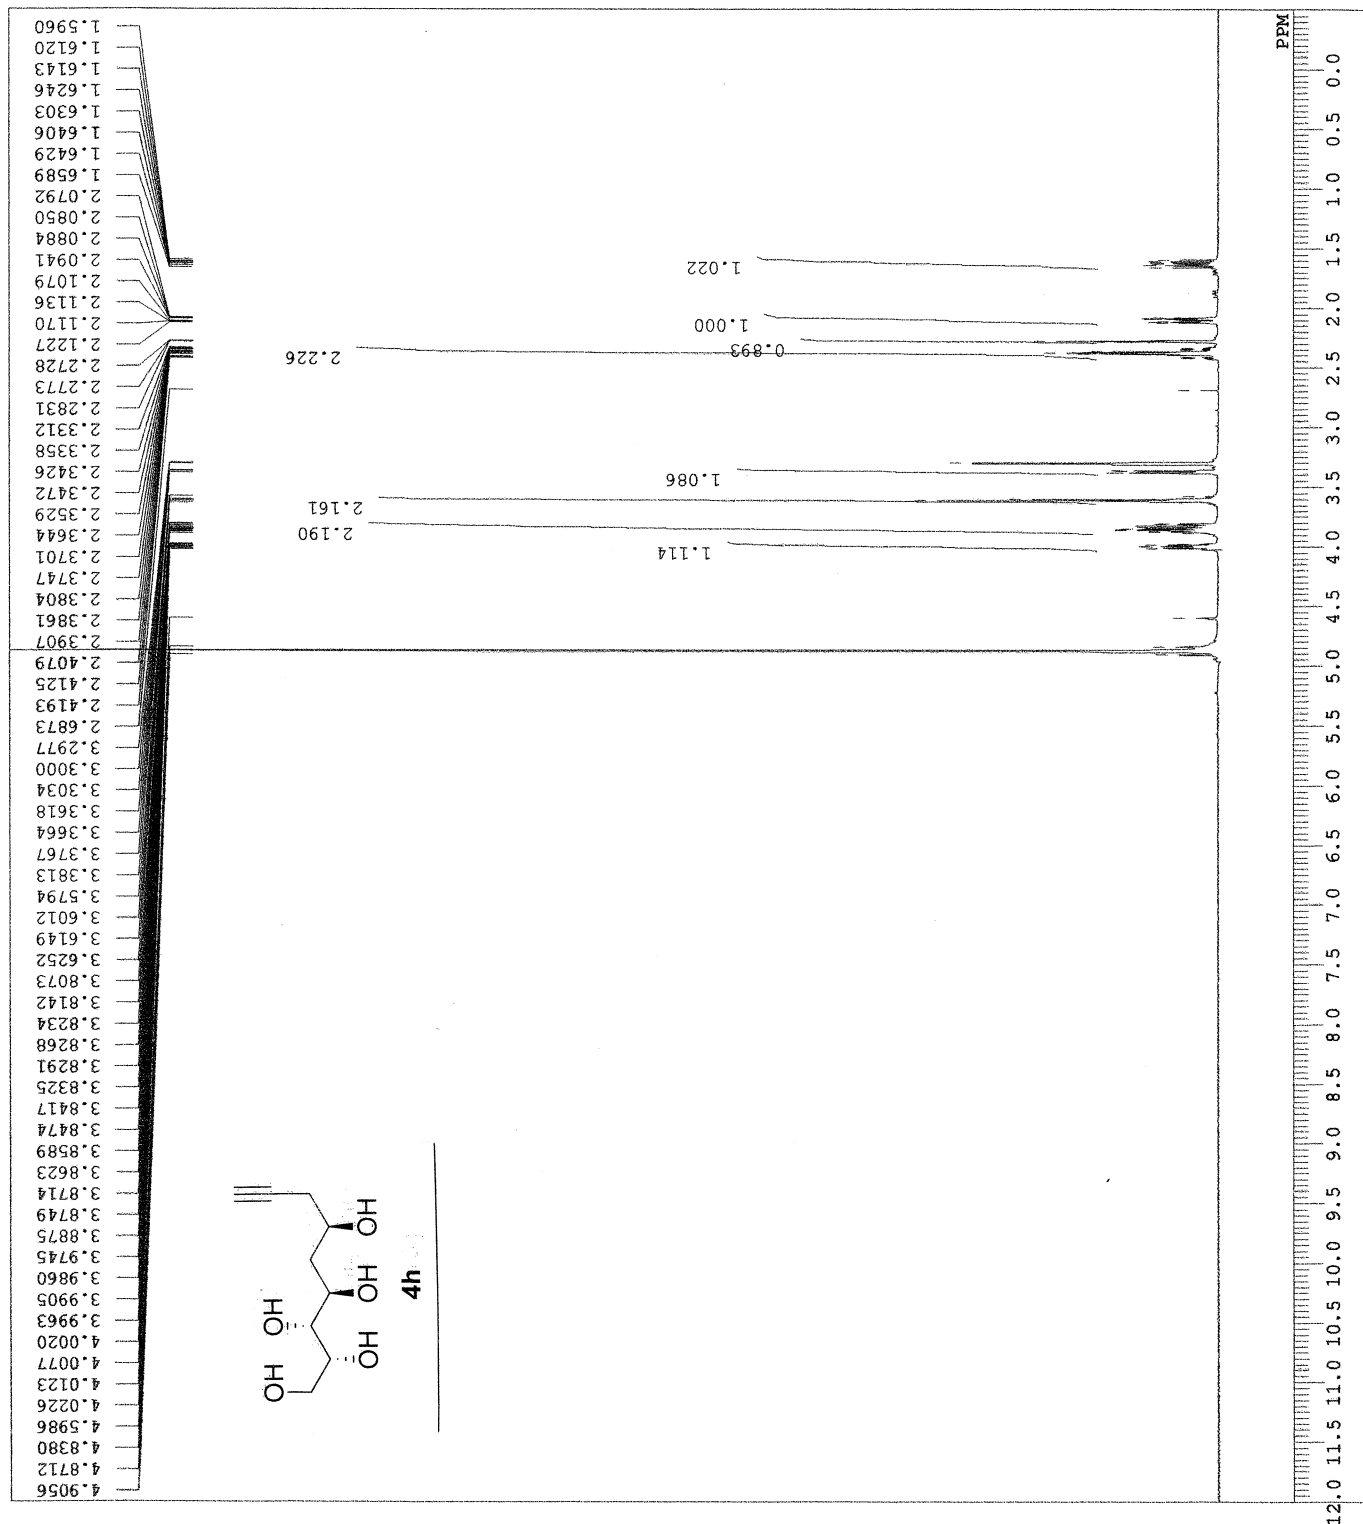

42

r-skp 2-d-galactose alkyne carb-1-1.jdf

DFILE  
 COMINT  
 DATIM  
 OBNUC  
 EXMOD  
 OBFRQ  
 OBSET  
 OBFIN  
 POINT  
 FREQU  
 SCANS  
 ACQTM  
 PD  
 PW1  
 IRNUC  
 CTMP  
 SLVNT  
 EXREF  
 BF  
 RGAIN

2015-07-27 10:22:03

13C  
 carbon.jpg  
 125.77 MHz  
 7.87 KHz  
 4.21 Hz  
 32767  
 39308.18 Hz  
 164  
 0.8336 sec  
 2.0000 sec  
 3.40 usec  
 1H  
 21.6 c  
 CD3OD  
 49.00 ppm  
 0.12 Hz  
 60

C:\Documents and Settings\user1\My Documents\Goussell\propargylation\data collection\NATURE DATA\final one\carb1-skp 2-d-galactose alkyne carb-1-1.jdf

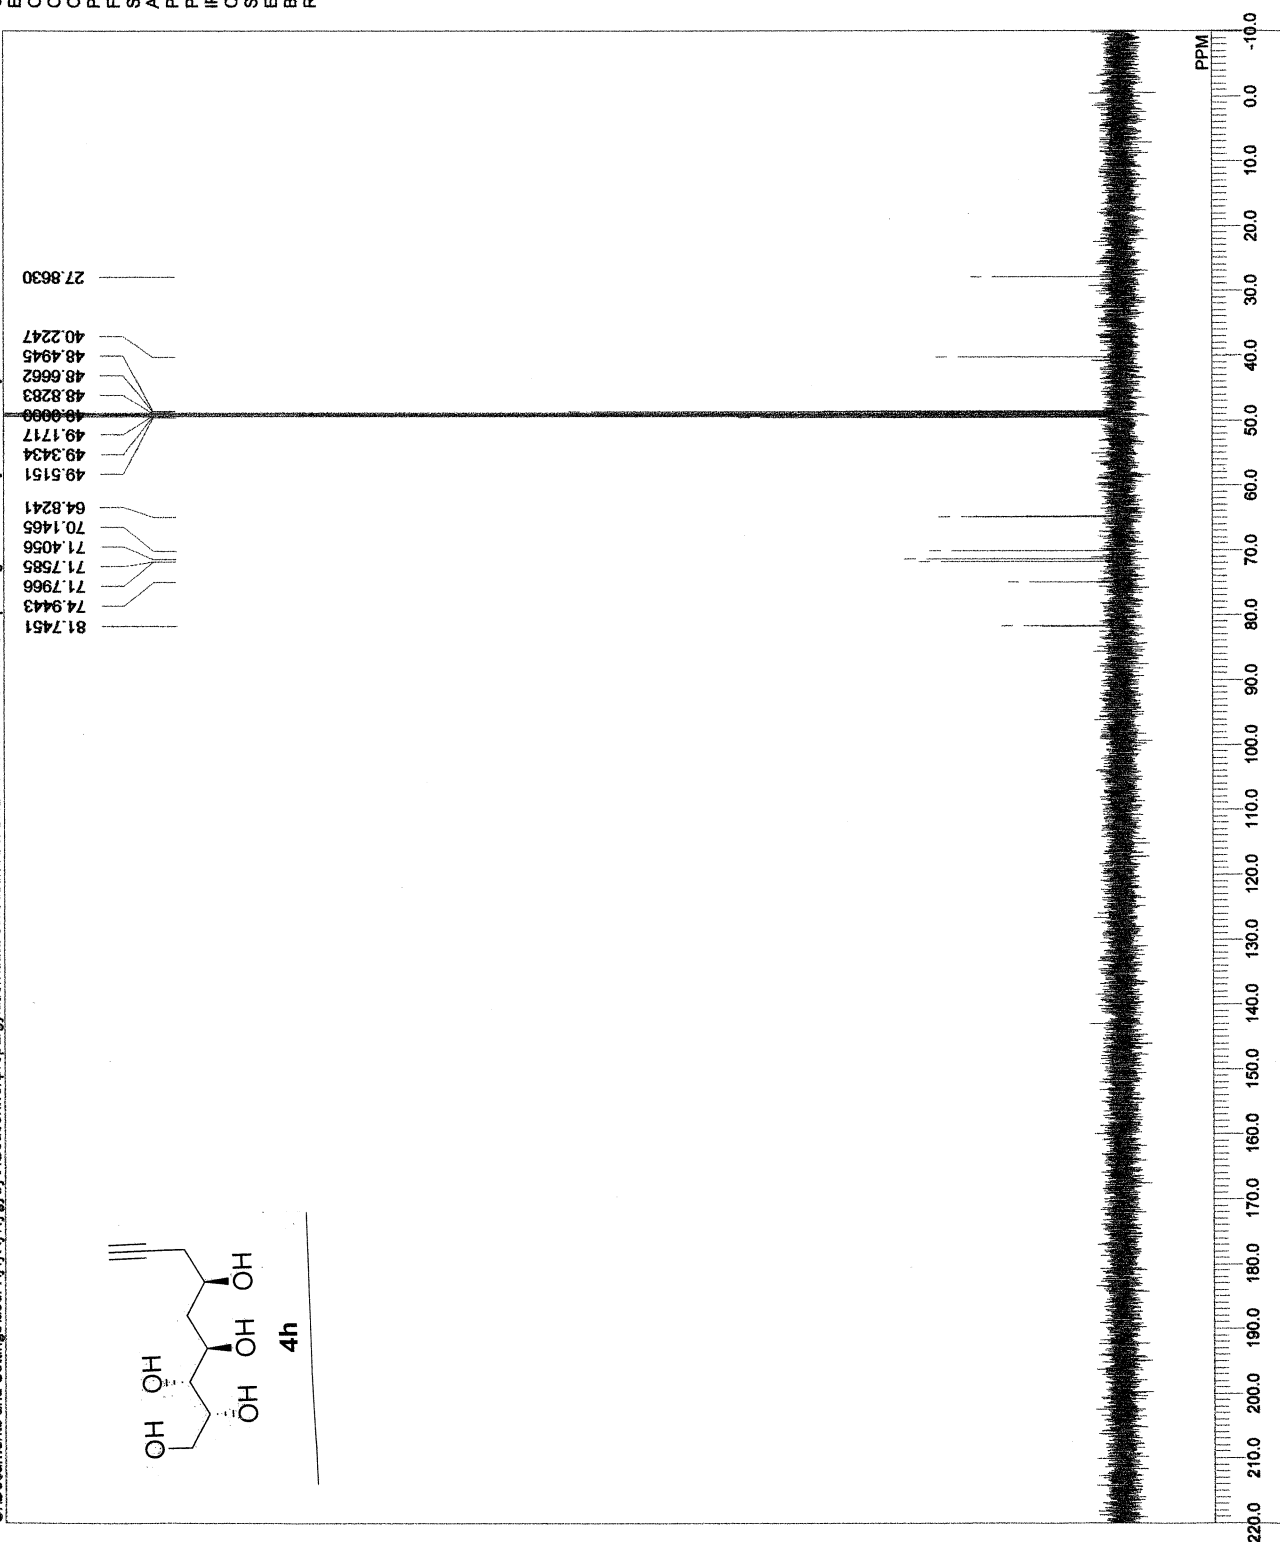

DFILE wei s-skip 2-d-glucose-1-1.als  
 COMNT 21-05-2015 20:28:40  
 DATIM 1H  
 OBNUC 1H  
 EXMOD proton, 1H  
 OBFRQ 301.76 MHz  
 OBSET 8.51 KHz  
 OBFIN 3.34 Hz  
 POINT 13107  
 FREQU 5682.35 Hz  
 SCANS 5  
 ACQTM 2.2282 sec  
 PD 5.0000 sec  
 PW1 4.99 usec  
 IRNUC 1H  
 CTEMP 22.4 c  
 SLVNT CD3OD  
 EXREF 3.30 ppm  
 BF 0.12 Hz  
 RGAIN 38

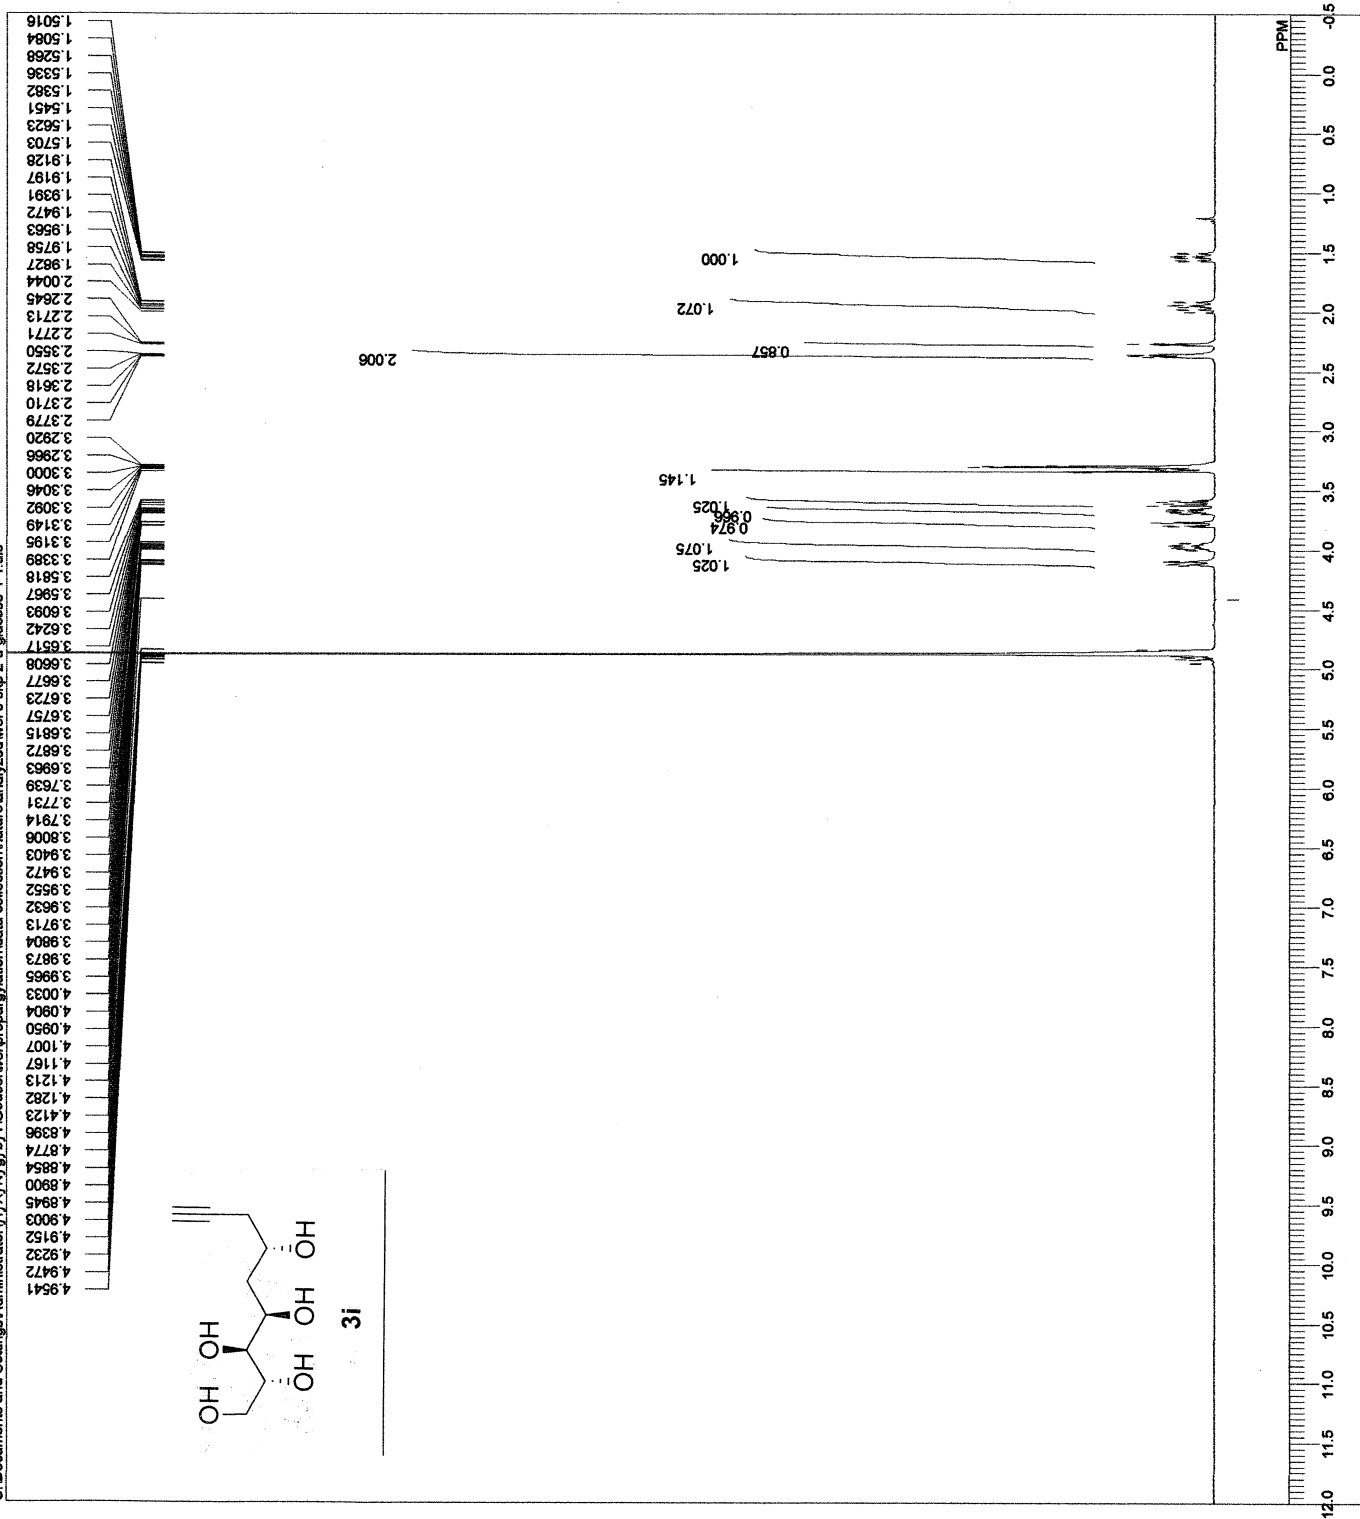

32

DFILE  
COMINT  
DATIM  
OBNUC  
EXMOD  
OBFREQ  
OBFSET  
OBFIN  
POINT  
FREQU  
SCANS  
ACQTM  
PD  
PW1  
IRNUC  
CTEMP  
SLVNT  
EXREF  
BF  
RGAIN

wei s-2-d-glucose carb-1-1.jdf  
21-08-2015 20:37:44  
13C  
carbon.jzo  
98.52 MHz  
4.64 KHz  
8.74 Hz  
32767  
30788.18 Hz  
1056  
1.0643 sec  
2.0000 sec  
3.18 usec  
1H  
22.6 c  
CD3OD  
49.00 ppm  
0.12 Hz  
60

C:\Documents and Settings\Administrator\My Documents\My Documents\My Documents\data collection\nature\final\wei s-2-d-glucose carb-1-1.jdf

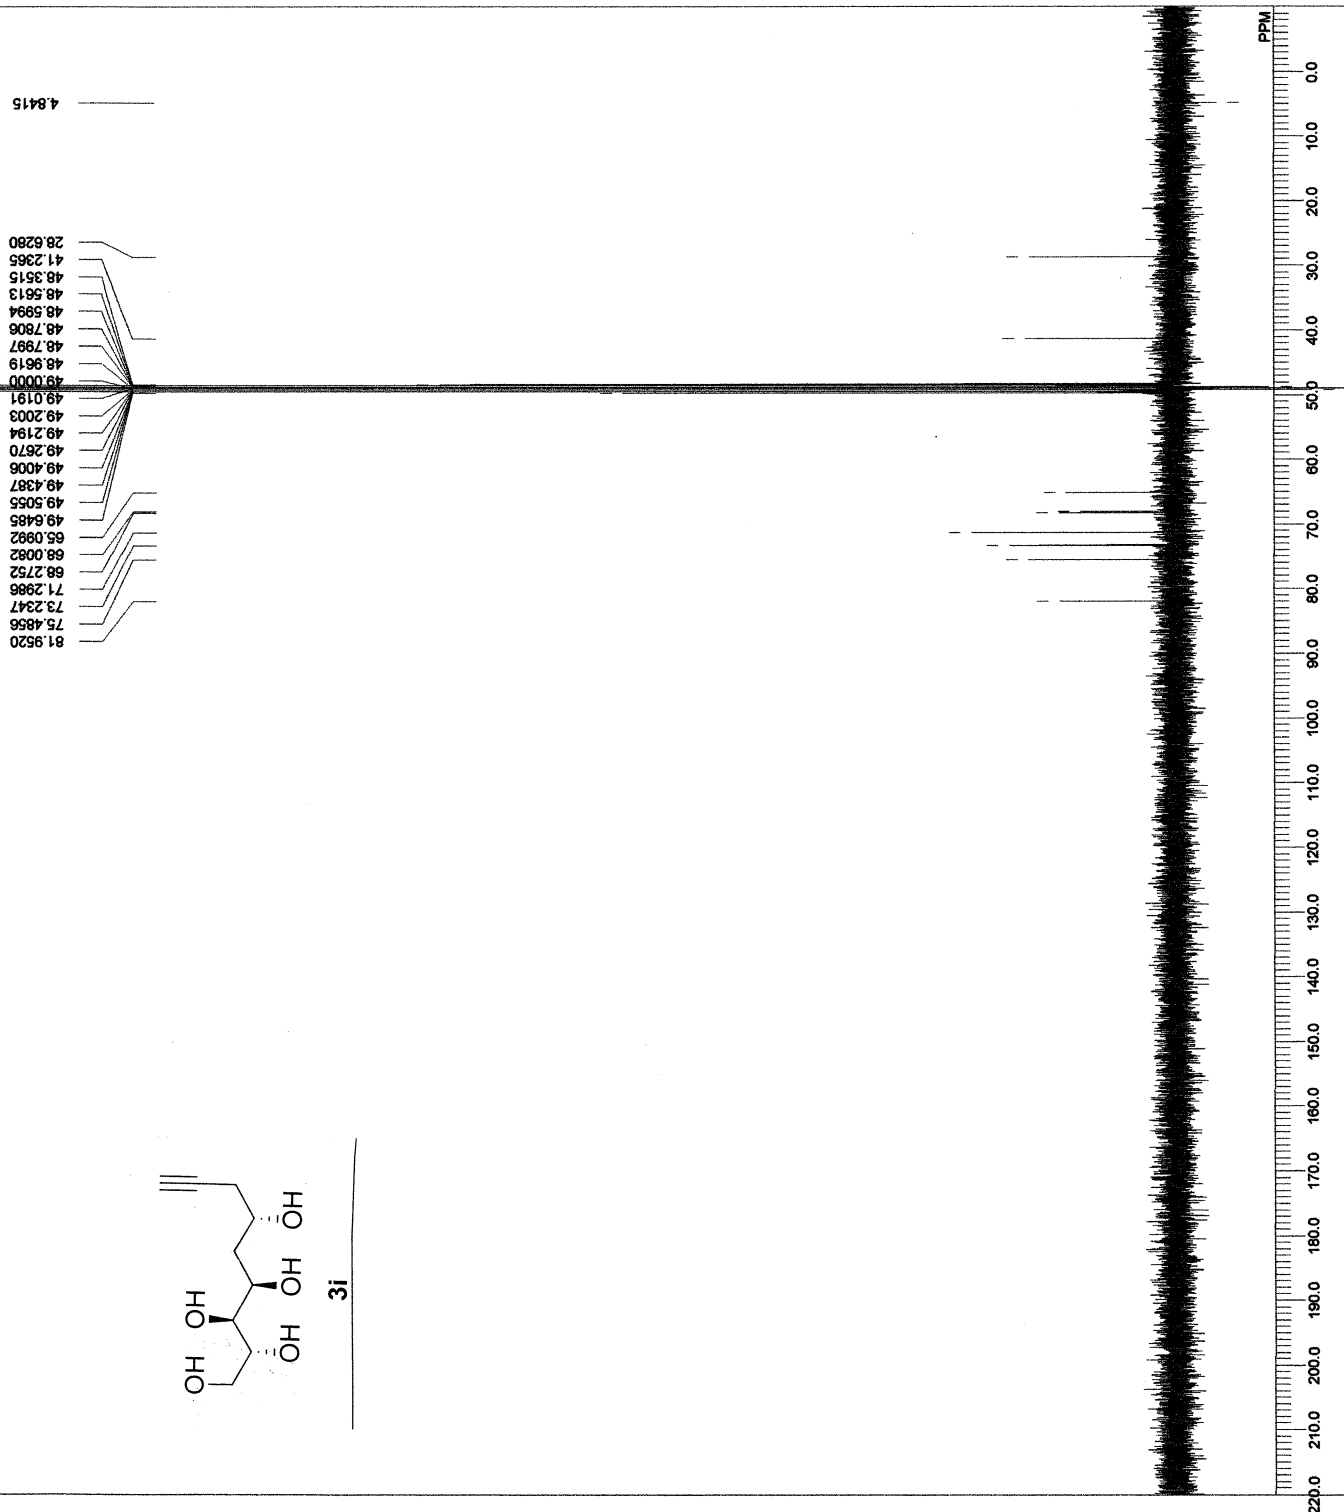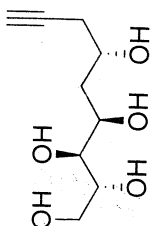

3i

DFILE 4i r-skp 2-d-glu alkyne.als  
 COMNT  
 DATIM 2015-07-17 21:39:37  
 OBNUC 1H  
 EXMOD proton.jxp  
 OBFRQ 500.16 MHz  
 OBSET 2.41 KHz  
 OBFIN 6.01 Hz  
 POINT 13107  
 FREQU 7507.51 Hz  
 SCANS 4  
 ACQTM 1.7459 sec  
 PD 5.0000 sec  
 PW1 5.55 usec  
 IRNUC 1H  
 CTEMP 21.2 c  
 SLVNT CD3OD  
 EXREF 3.30 ppm  
 BF 0.12 Hz  
 RGAIN 30

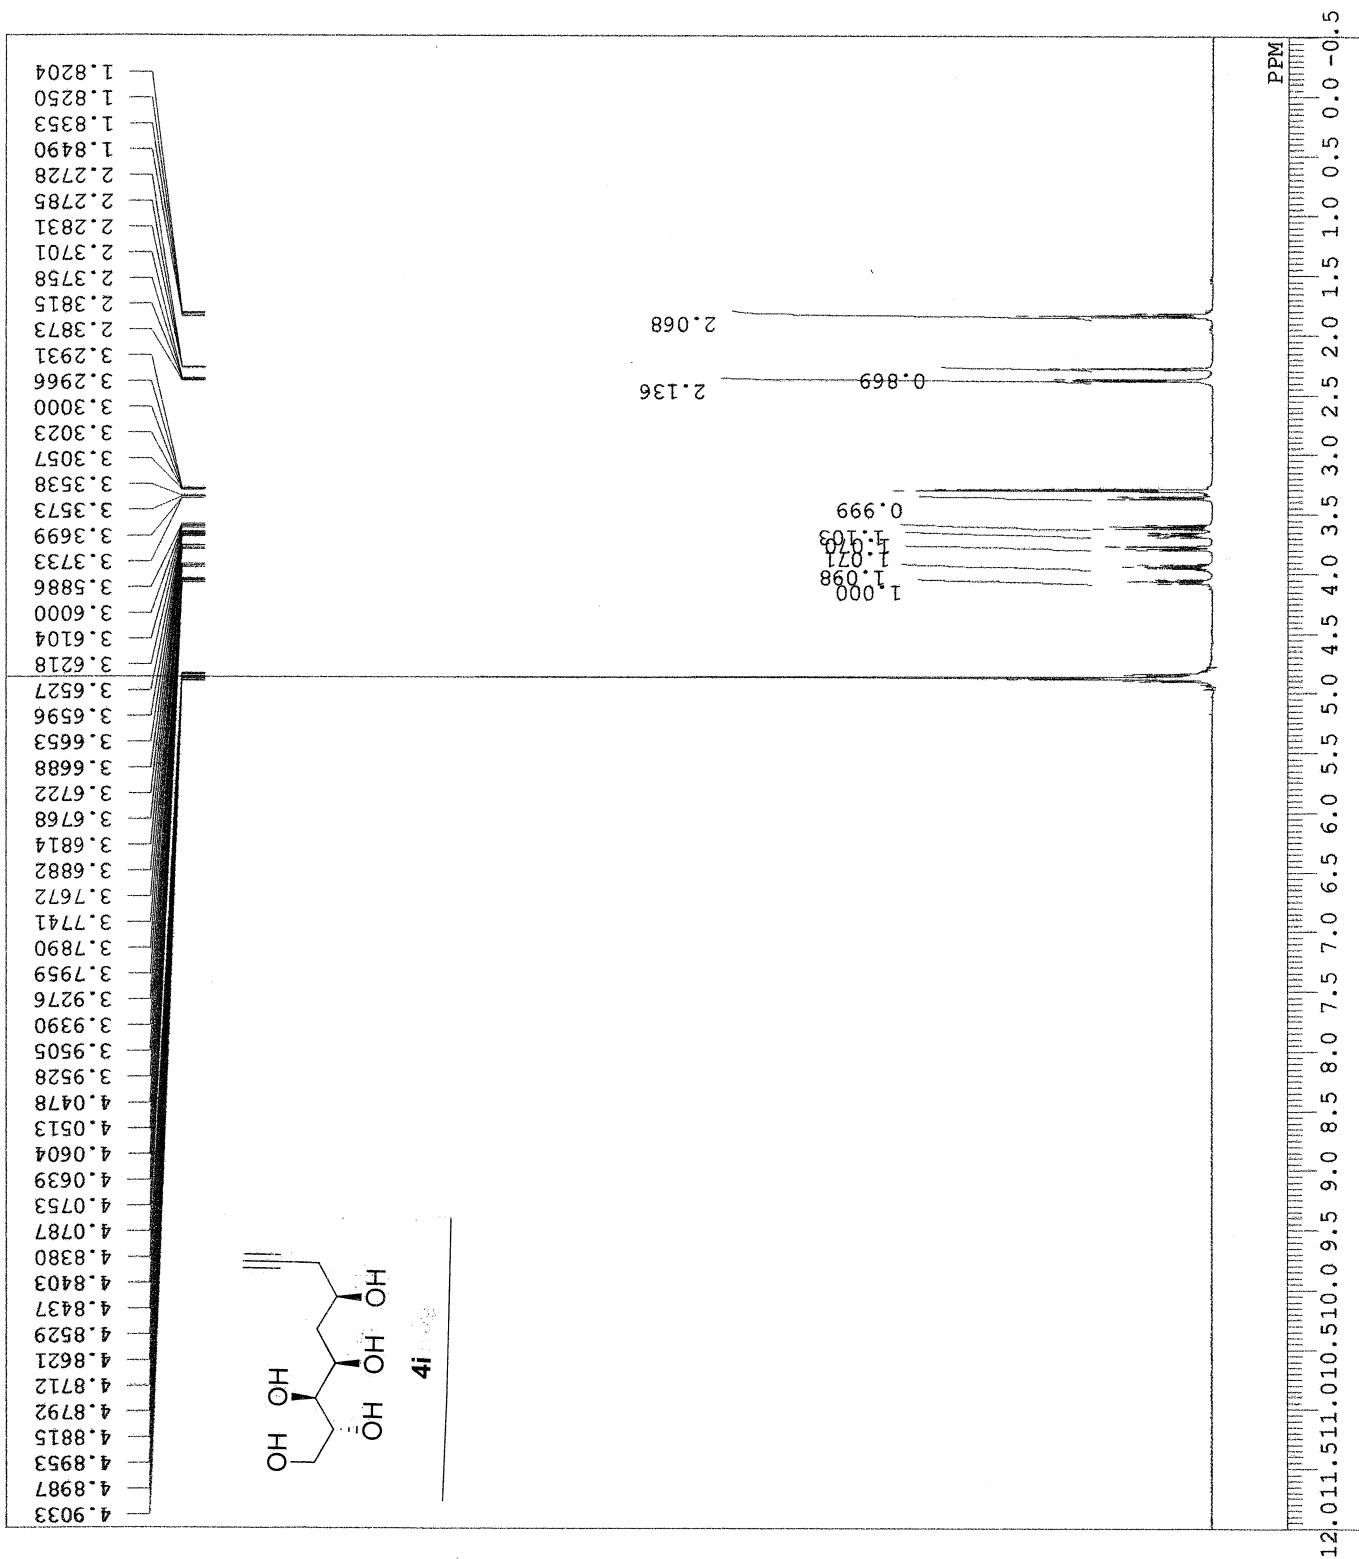

4i r-skp 2-d-glu carb-1-1.als

|       |             |                     |
|-------|-------------|---------------------|
| DFILE | COMNT       | 2015-07-17 21:40:57 |
| DATIM | OBNUC       | 13C                 |
| EXMOD | carbon.jxp  |                     |
| OBFRQ | 125.77 MHz  |                     |
| OBSET | 7.87 KHz    |                     |
| OBFIN | 4.21 Hz     |                     |
| POINT | 26214       |                     |
| FREQU | 31446.54 Hz |                     |
| SCANS | 841         |                     |
| ACQTM | 0.8336 sec  |                     |
| PD    | 2.0000 sec  |                     |
| PW1   | 3.40 usec   |                     |
| IRNUC | 1H          |                     |
| CTEMP | 21.9 c      |                     |
| SLVNT | CD3OD       |                     |
| EXREF | 49.00 ppm   |                     |
| BF    | 0.12 Hz     |                     |
| RGAIN | 60          |                     |

81.7075  
74.4582  
73.0274  
71.4345  
69.9179  
69.4982  
65.0628  
49.5151  
49.3625  
49.3434  
49.1717  
49.0000  
48.8378  
48.6662  
48.4945  
40.2818  
27.8818

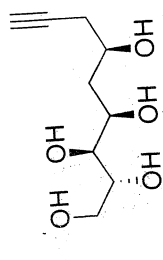

4i

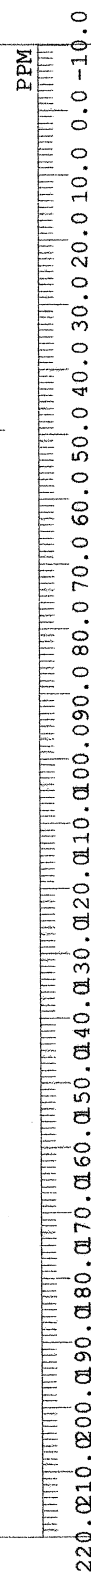

PGF s-skp mannosamin-1-1.jdf

COMNT 2015-05-23 14:18:51

DATIM 1H

OBNUC proton.jxp

EXMOD 500.16 MHz

OBFRQ 2.41 KHz

OBSET 6.01 Hz

OBFIN 16384

POINT 9384.38 Hz

FREQU 7

SCANS 1.7459 sec

ACQTM 5.0000 sec

PD 5.55 usec

PW1 1H

IRNUC 20.7 c

CTEMP 4.65 ppm

SLVNT D2O

EXREF 0.12 Hz

BF 30

RGAIN

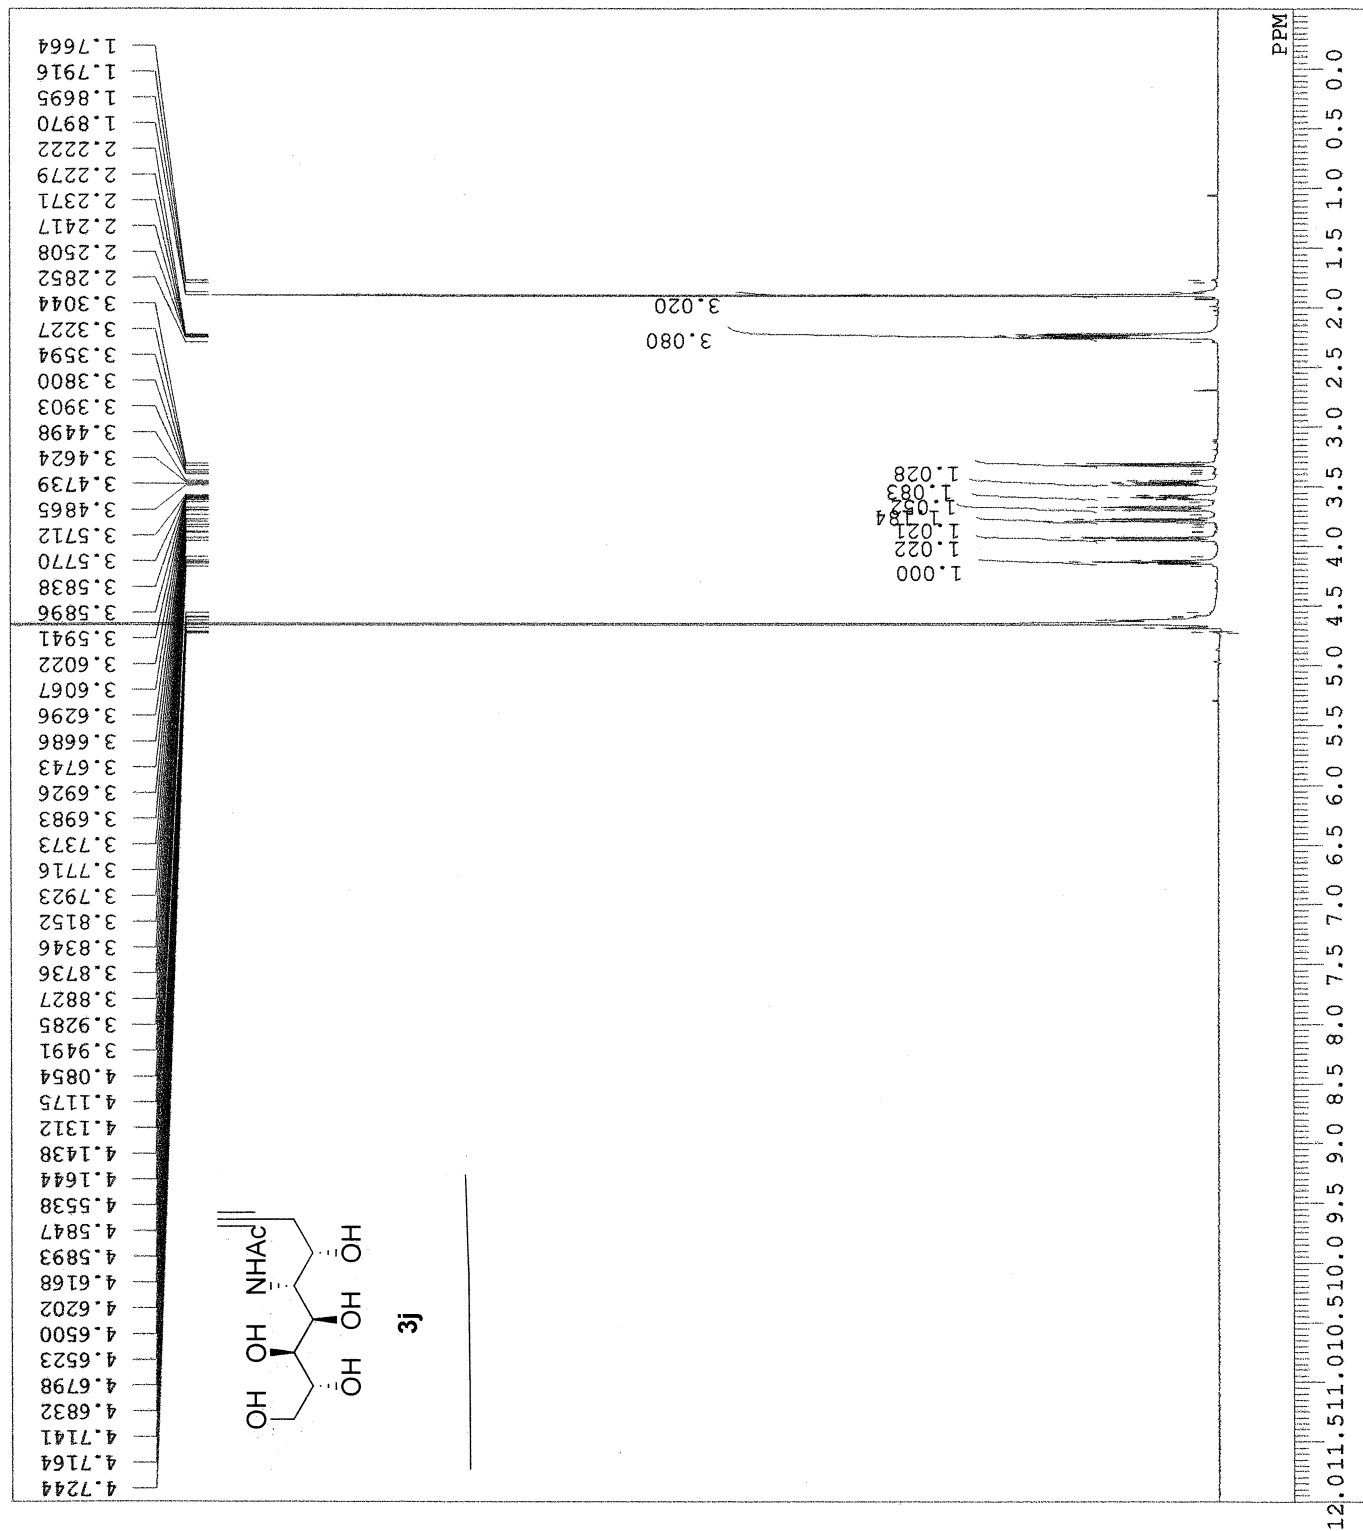



3j

PGF s-skp mannosamin carb-1-1

DFILE  
COMNT  
DATIM 2015-05-23 15:24:60  
OBNUC 13C  
EXMOD carbon.jxp  
OBFRQ 125.77 MHz  
OBSET 7.87 KHz  
OBFIN 4.21 Hz  
POINT 32768  
FREQU 31446.54 Hz  
SCANS 310  
ACQTM 1.0420 sec  
PD 2.0000 sec  
PW1 3.40 usec  
IRNUC 1H  
CTEMP 21.6 c  
SLVNT CD3OD  
EXREF 49.00 ppm  
BF 0.12 Hz  
RGAIN 74

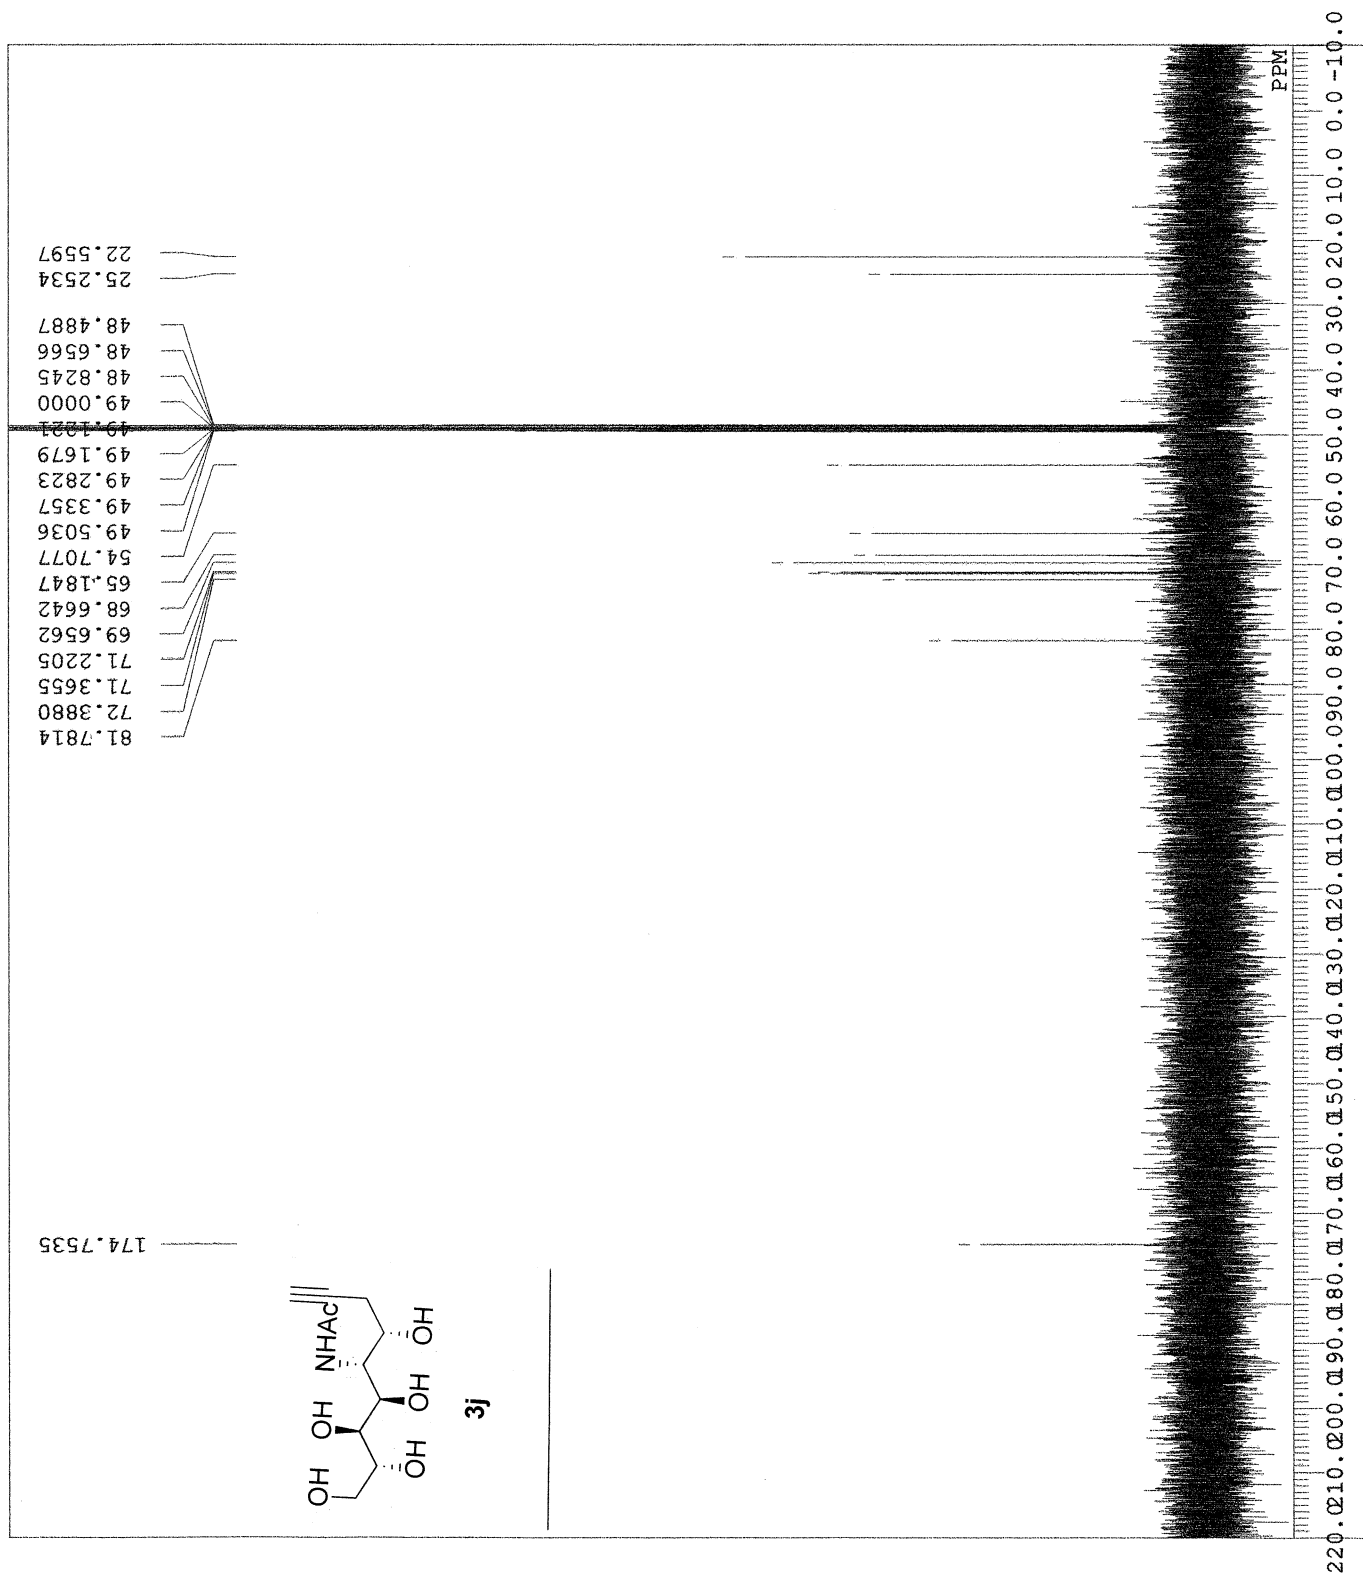

DFILE  
 COMNT  
 DATIM  
 OBNUC  
 EXMOD  
 OBFRQ  
 OBSET  
 OBFIN  
 POINT  
 FREQU  
 SCANS  
 ACQTM  
 PD  
 PW1  
 IRNUC  
 CTEMP  
 SLVNT  
 EXREF  
 BF  
 RGAIN

wei R-SKP mannosamin alkyne-1.  
 2015-06-22 20:12:07  
 1H  
 proton.jxp  
 500.16 MHz  
 2.41 KHz  
 6.01 Hz  
 13107  
 7507.51 Hz  
 1.7459 sec  
 5.0000 sec  
 5.55 usec  
 1H  
 21.2 c  
 0.00 ppm  
 0.12 Hz  
 28

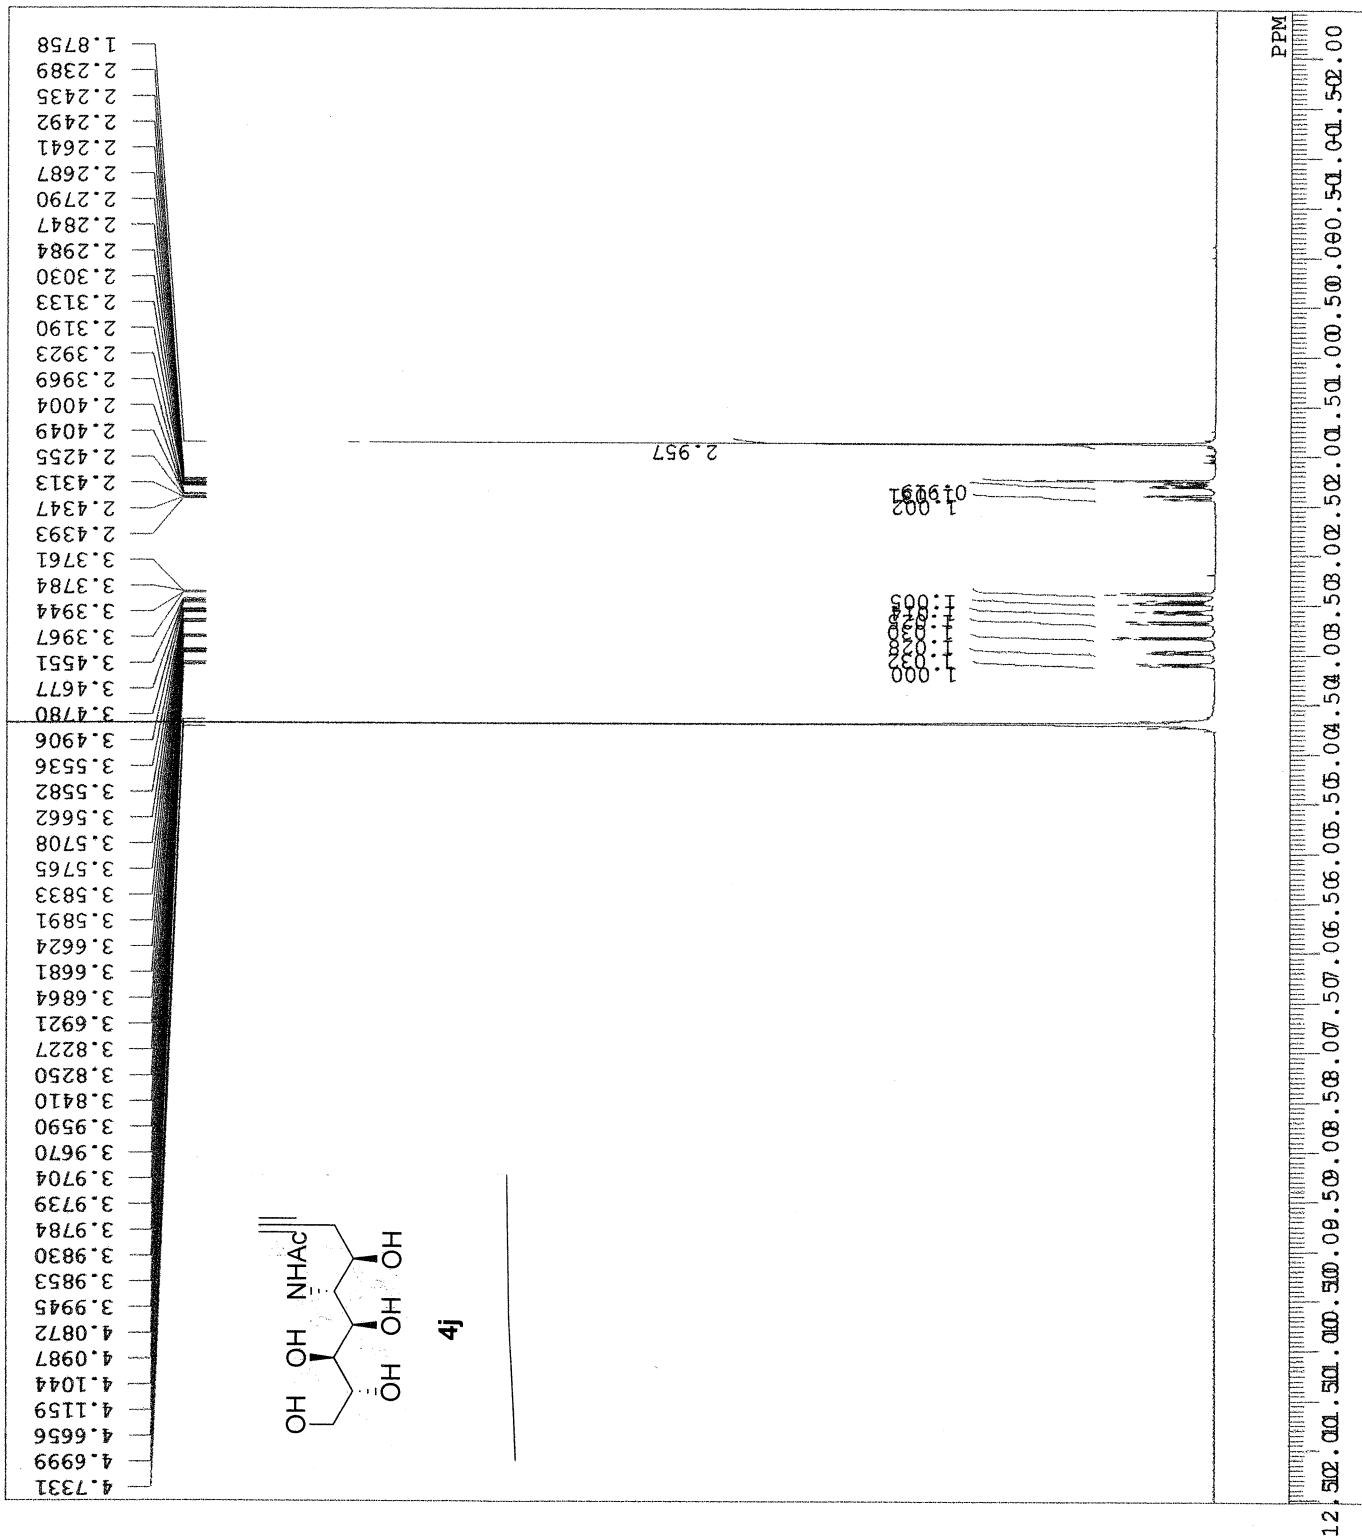

wei S-SKP mannosamin alk  
2015-08-22 20:13:27  
13C  
carbon.kxp  
125.77 MHz  
7.87 KHz  
4.21 Hz  
32767  
39308.18 Hz  
170  
0.0000 sec  
2.0000 sec  
3.40 usec  
1H 21.5 c  
D2O  
77.00 ppm  
0.12 Hz  
60

DFILE  
COMMIT  
DATIM  
OBNUC  
EXMOD  
OBFRO  
OBSET  
OBFIN  
POINT  
FREQU  
SCANS  
ACQTM  
PD  
PW1  
IRNUC  
CTEMP  
SLVNT  
EXREF  
BF  
RGAIN

C:\Documents and Settings\user1\My Documents\Gouse\NMR\data collection\NATURE DATA\carb\wei S-SKP mannosamin alk\carb\_copy1-1-1.jcf

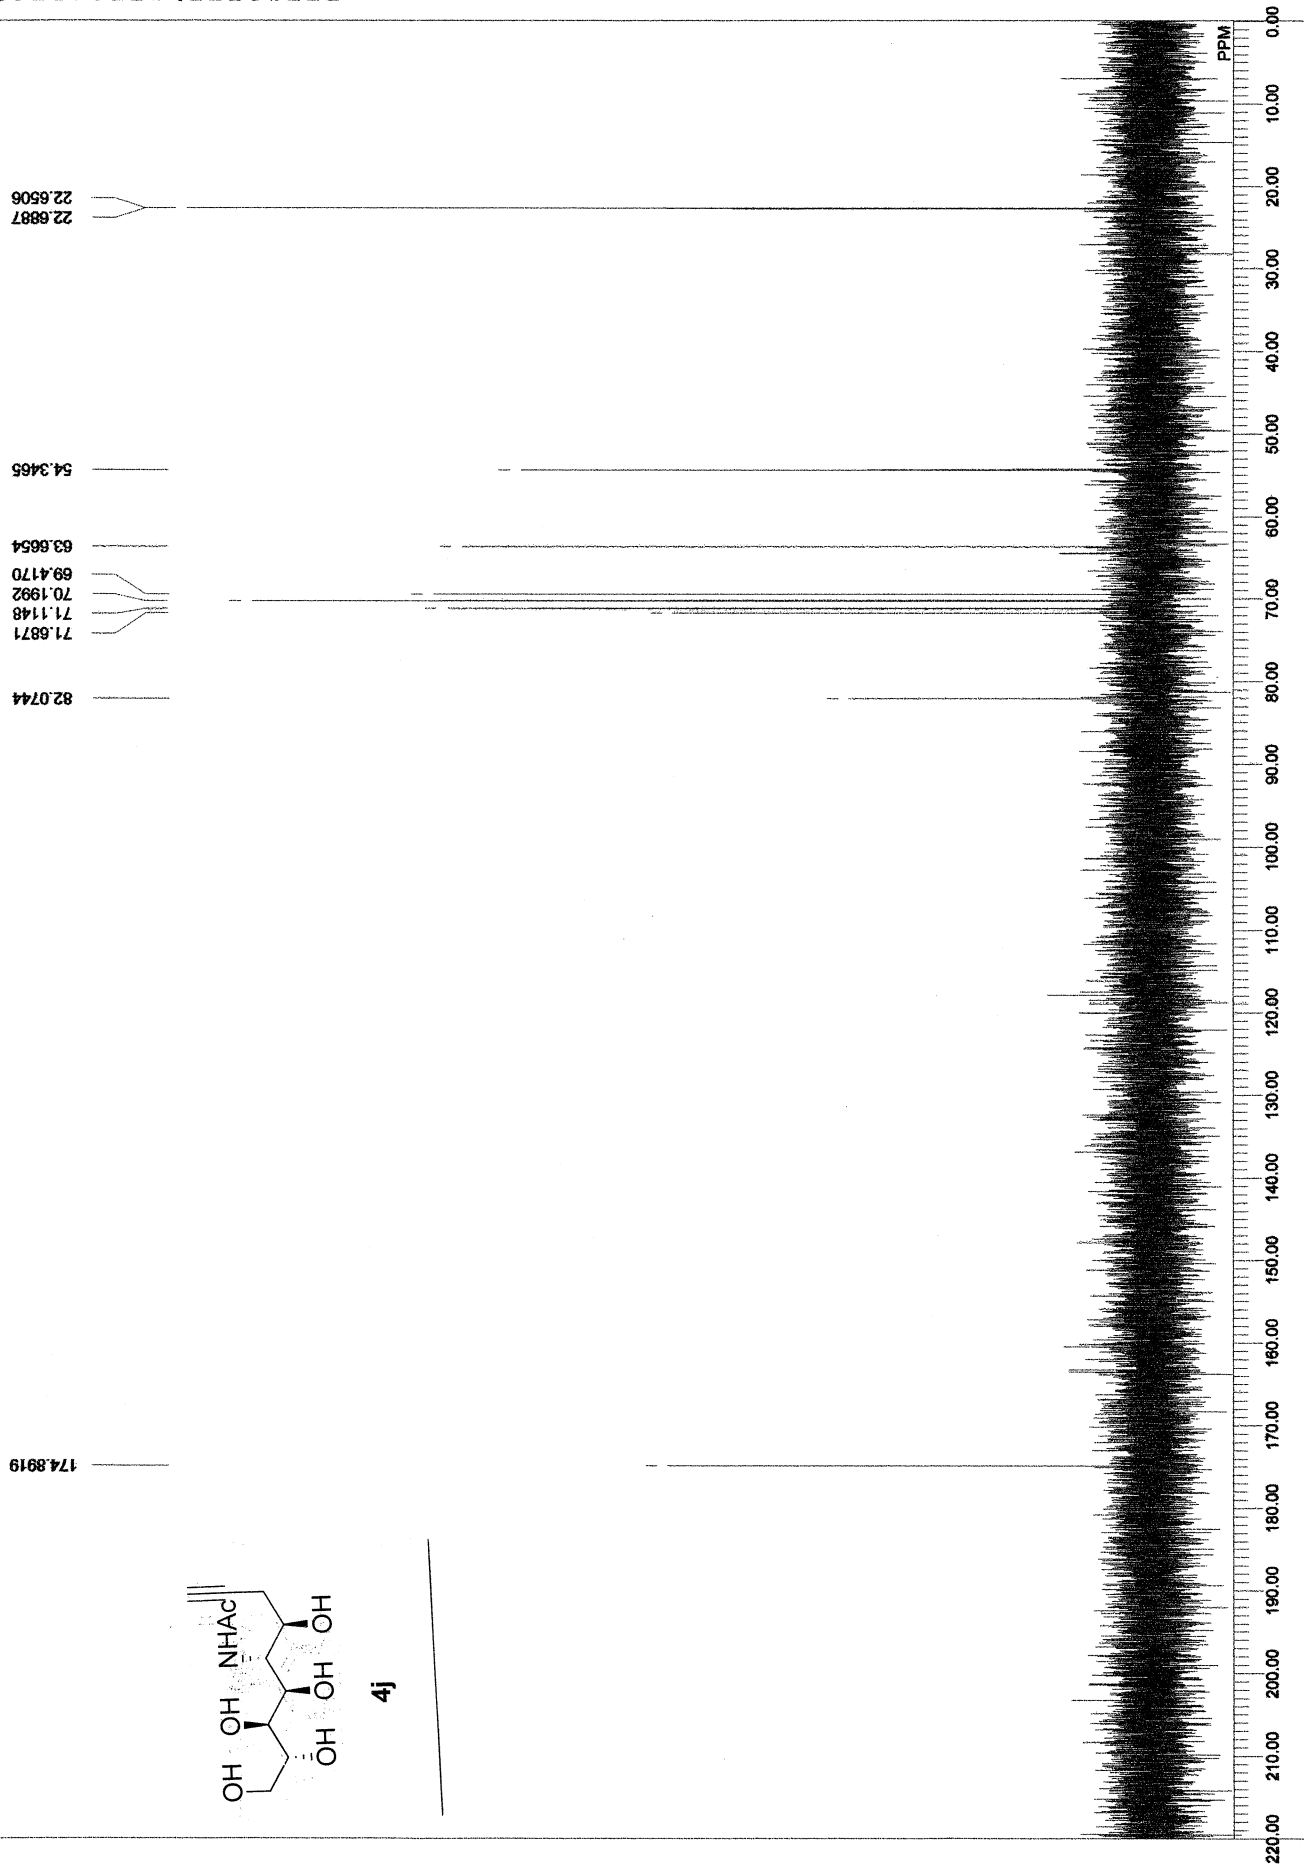

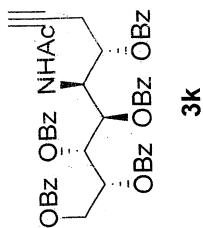

DFILE wei S-SKP galactosamin-2-1.als  
 CONNT 2015-04-24 08:41:38  
 DATIM 1H  
 OBNUC proton.jpg  
 EXMOD 500.16 MHz  
 OBFRQ 2.41 KHz  
 OBSET 6.01 Hz  
 OBFIN 13107  
 POINT 7507.51 Hz  
 FREQU 8  
 SCANS 1.7459 sec  
 ACQTM 5.0000 sec  
 PD 5.55 usec  
 PW1 1H  
 IRNUC 28.5 c  
 CTMP CDGL3  
 SLVNT 7.24 ppm  
 EXREF 0.12 Hz  
 BF 30  
 RGAIN

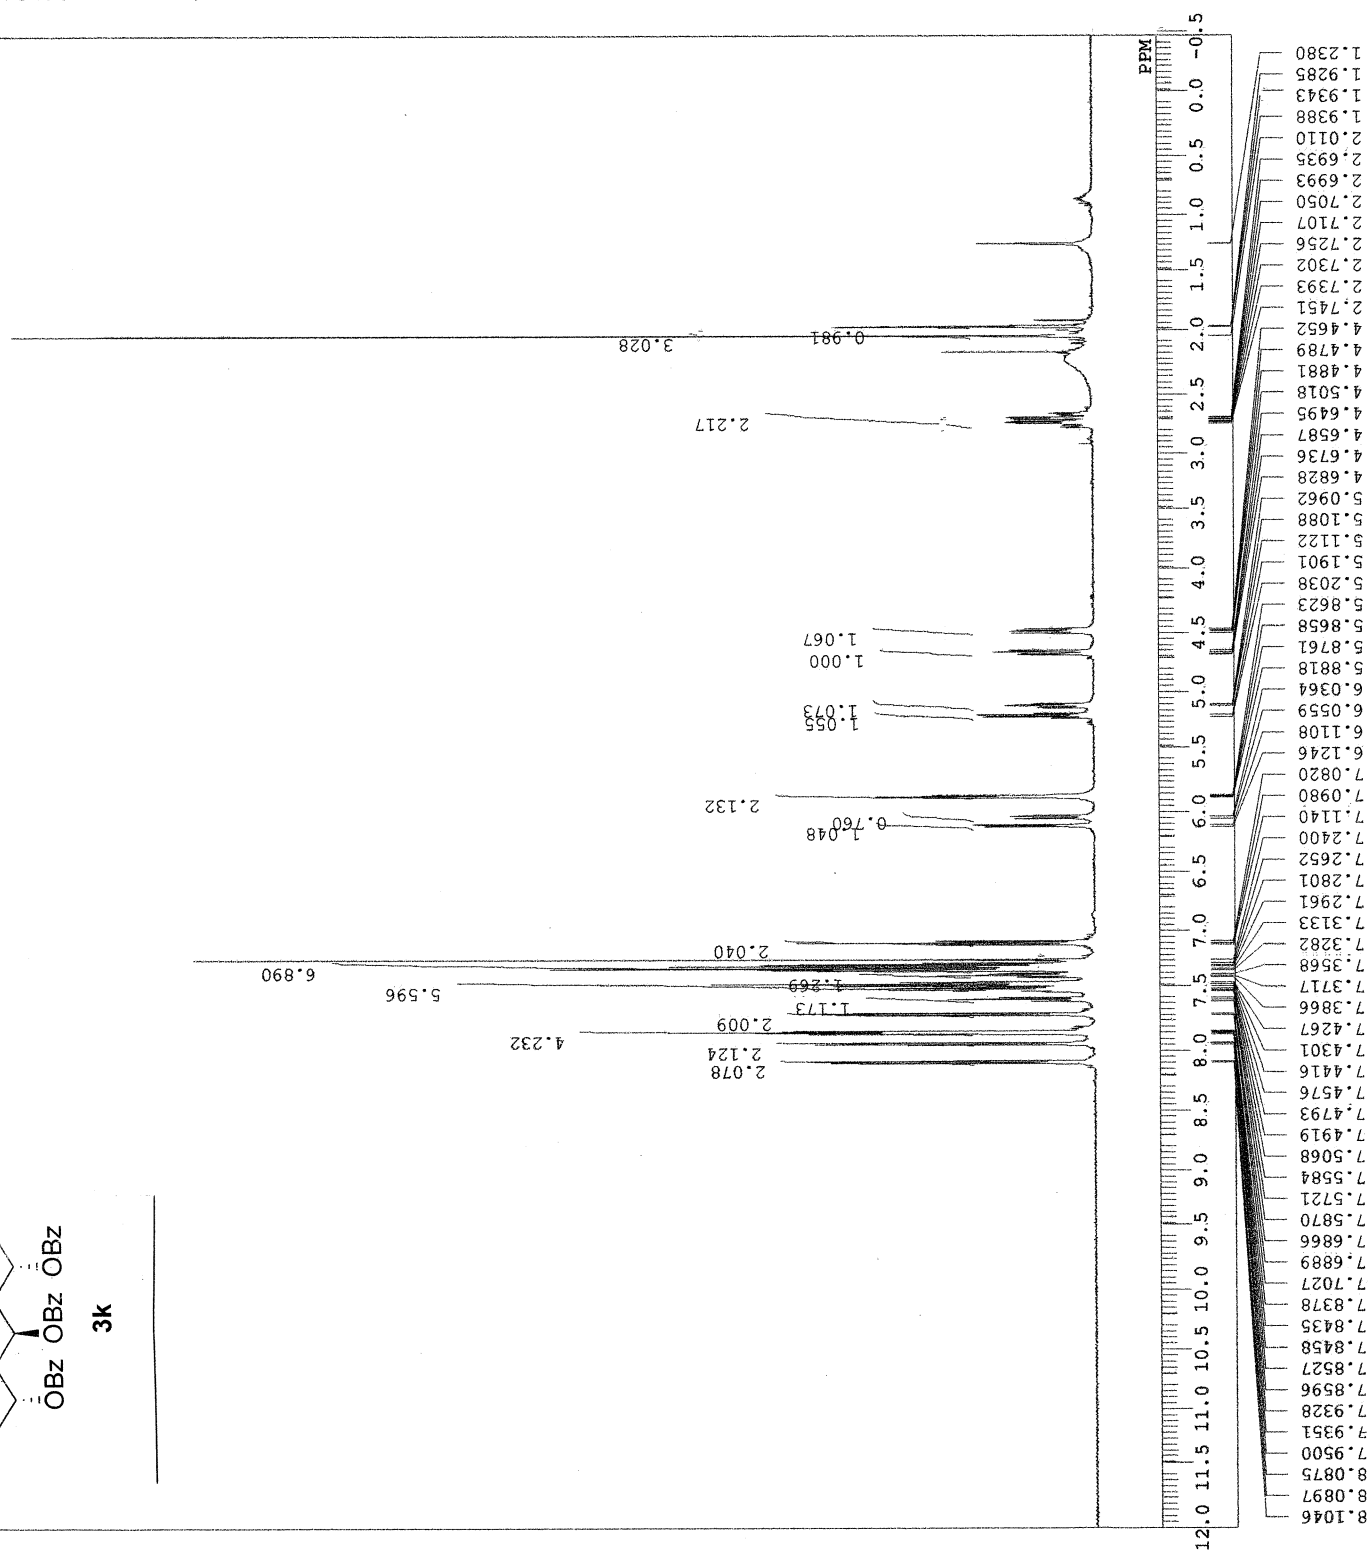

DFILE wei S-SKP galactosamin carb-1  
 COMNT 2015-04-09 22:55:17  
 DATIM 13C  
 OBNUC carbon.jxp  
 EXMOD 125.77 MHz  
 OBFRQ 7.87 KHz  
 OBSET 4.21 Hz  
 OBFIN 32767  
 POINT 39308.18 Hz  
 FREQU 12500  
 SCANS 0.8336 sec  
 ACQTM 2.0000 sec  
 PD 3.40 usec  
 PW1 1H  
 IRNUC 27.4 c  
 CTEMP ACETN  
 SLVNT 29.80 ppm  
 EXREF 0.12 Hz  
 BF 60  
 RGAIN

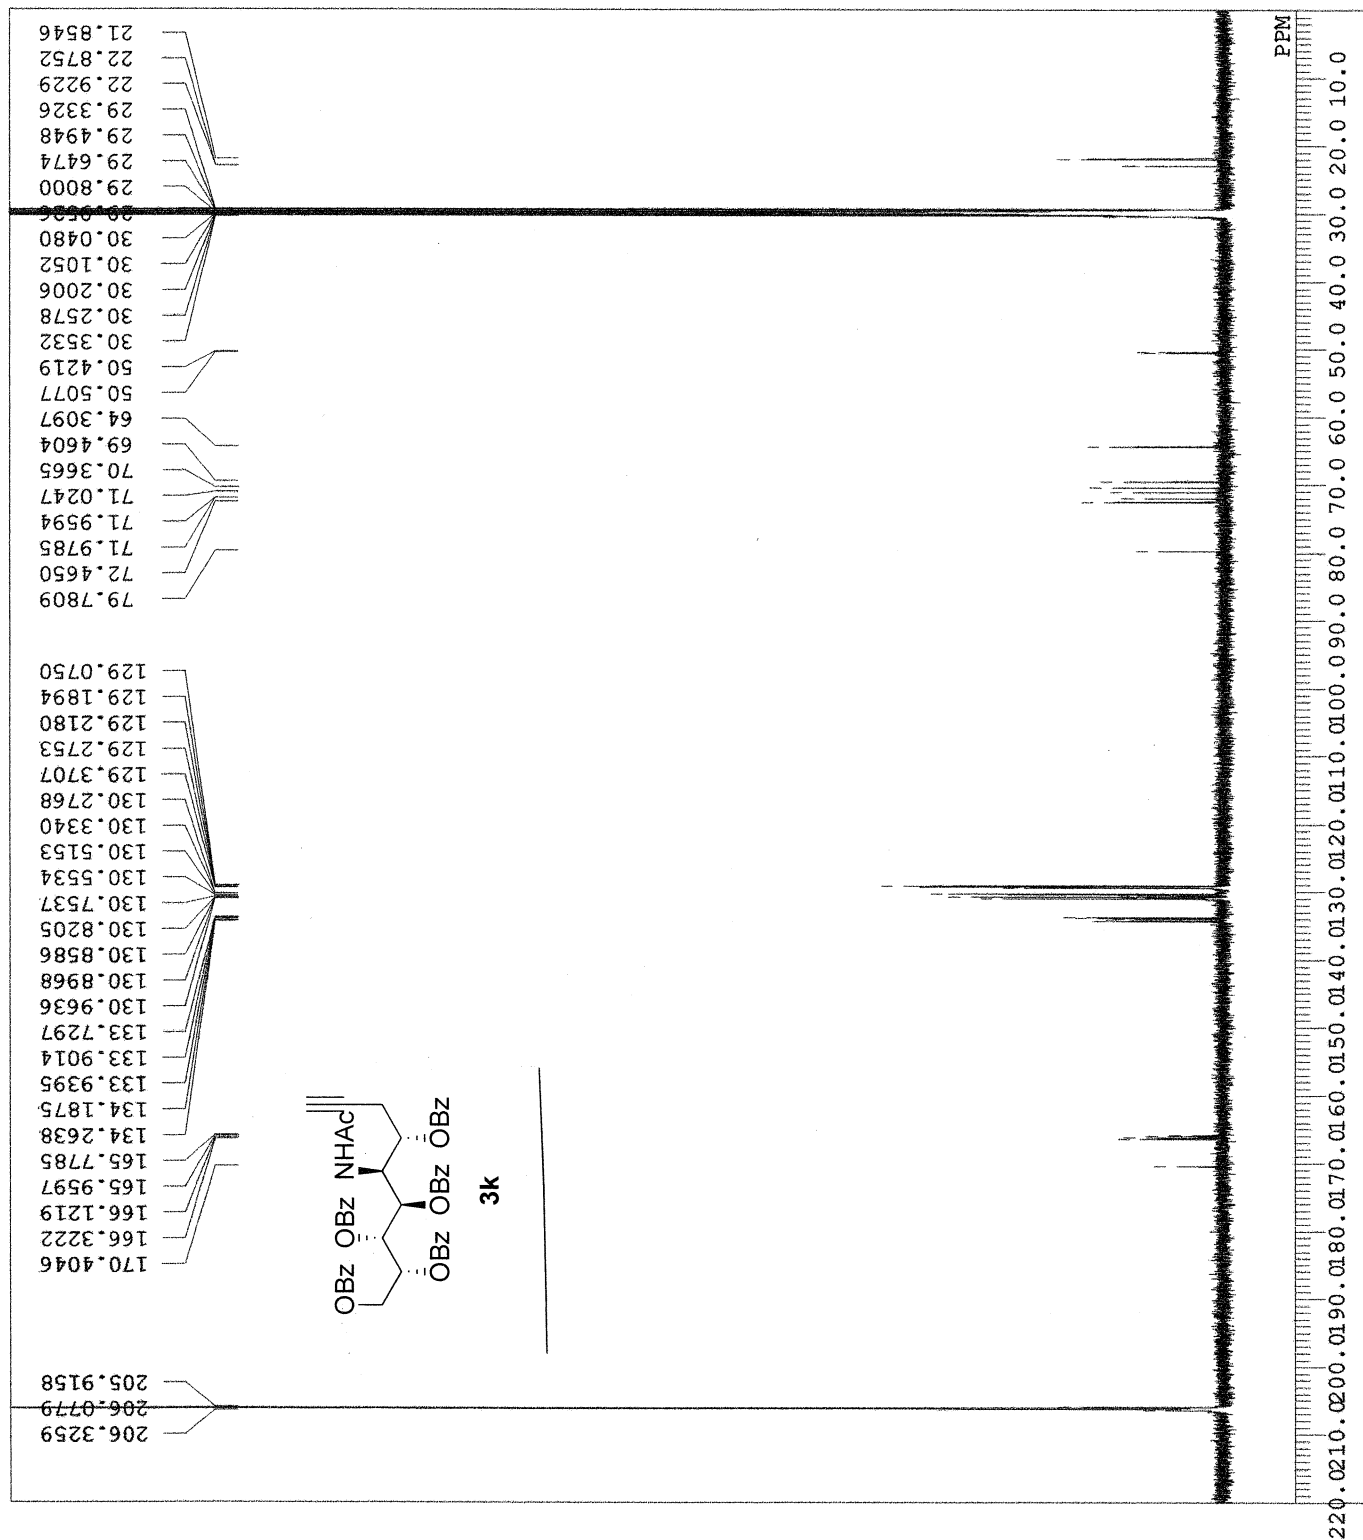

DFILE wei R-SKP galactosamin-2-1.als

CONNT 2015-04-24 08:44:49  
OENUC 1H  
EXMOD proton.jxp  
OBFREQ 500.16 MHz  
OBSET 2.41 KHz  
OBFIN 6.01 Hz  
POINT 13107  
FREQU 7507.51 Hz  
SCANS 12  
ACQTM 1.7459 sec  
PD 5.0000 sec  
PWL 5.55 usec  
IRNUC 1H  
CTEMP 28.4 C  
SLVNT CDCL3  
EXREF 7.24 ppm  
BF 0.12 Hz  
RGAIN 30

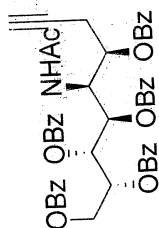

4K

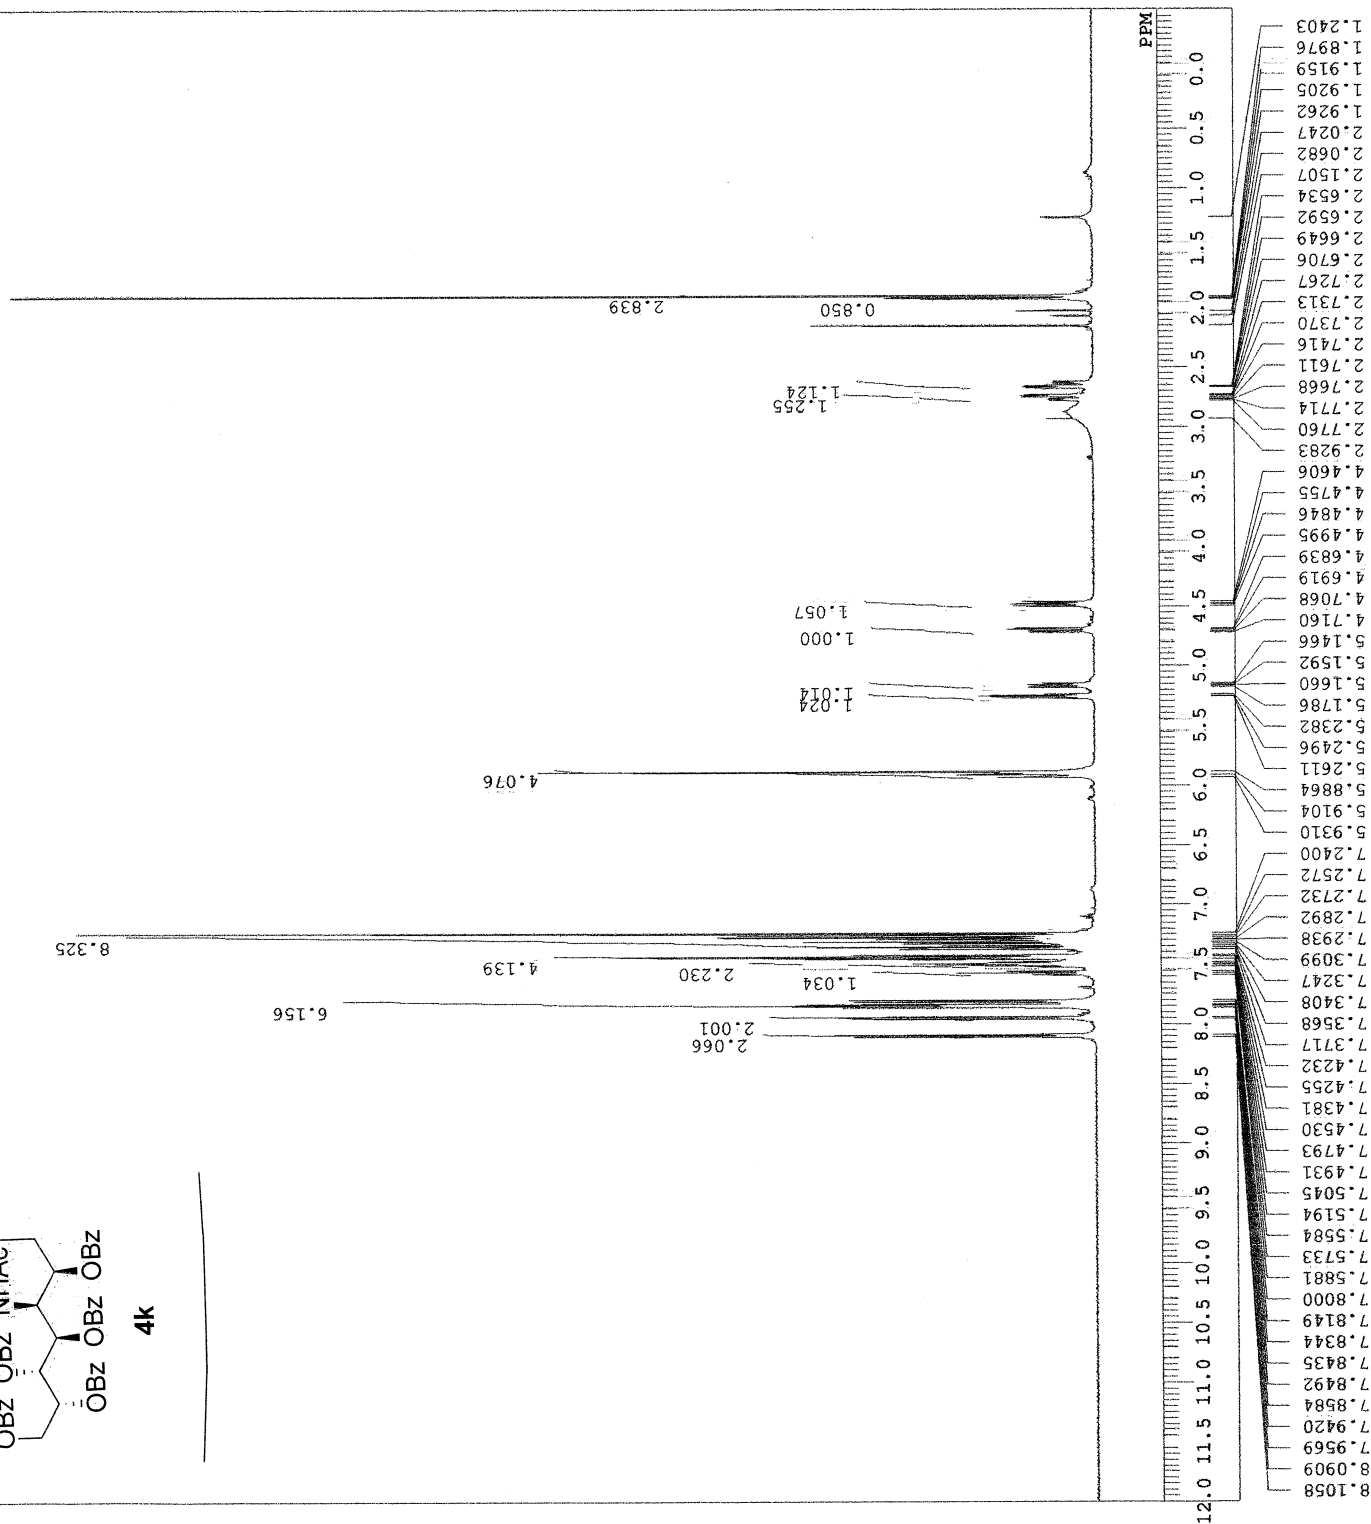

wei R-SKP galactosamin carb-1-1.als

DFILE COMNT  
 DATIM 2015-04-09 16:12:37  
 OBNUC 13C  
 EXMOD carbon.jpg  
 OBFREQ 125.77 MHz  
 OBSET 7.87 KHz  
 OBFIN 4.21 Hz  
 POINT 32767  
 FREQU 39308.18 Hz  
 SCANS 2181  
 ACQTM 0.8336 sec  
 PD 2.0000 sec  
 PW1 3.40 usec  
 IRNUC 1H  
 CTEMP 28.1 c  
 SLVNT ACETN  
 EXREF 29.80 ppm  
 BF 0.12 Hz  
 RGAIN 60

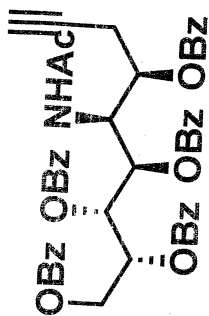

C:\Documents and Settings\user\My Documents\Goussell\propagation\data collection\JACS data\analyzed\wei R-SKP galactosamin carb-1-1.als

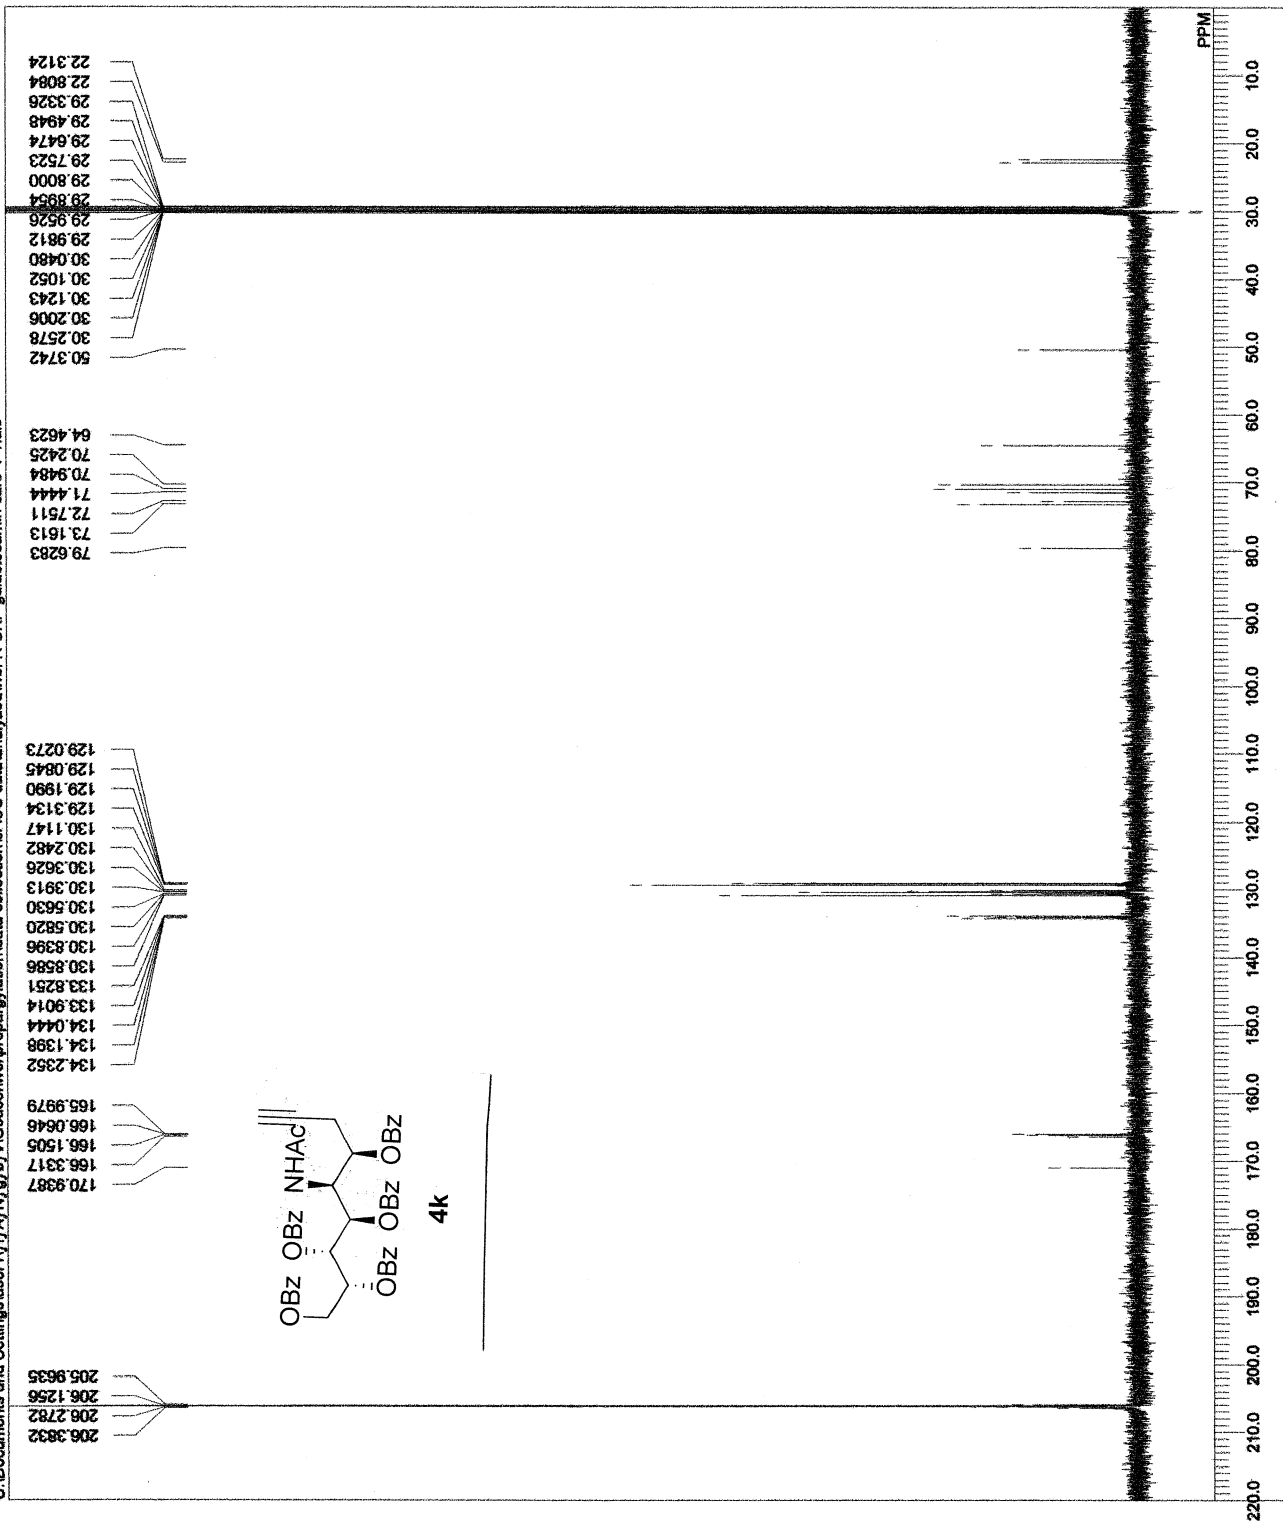

DFILE wei S-SKP glucosamin-2-1.als  
 COMNT  
 DATIM 2015-04-24 08:54:44  
 OENUC 1H  
 EXMOD proton.jxp  
 OBFRQ 500.16 MHz  
 OBSET 2.41 KHz  
 OBFIN 6.01 Hz  
 POINT 13107  
 FREQU 7507.51 Hz  
 SCANS 32  
 ACQTM 1.7459 sec  
 PD 5.0000 sec  
 PW1 5.55 usec  
 IRNUC 1H  
 CTMP 28.3 C  
 SLVNT CDCl3  
 EXREF 7.24 ppm  
 BF 0.12 Hz  
 RGAIN 30

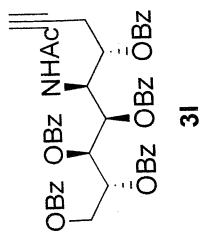

31

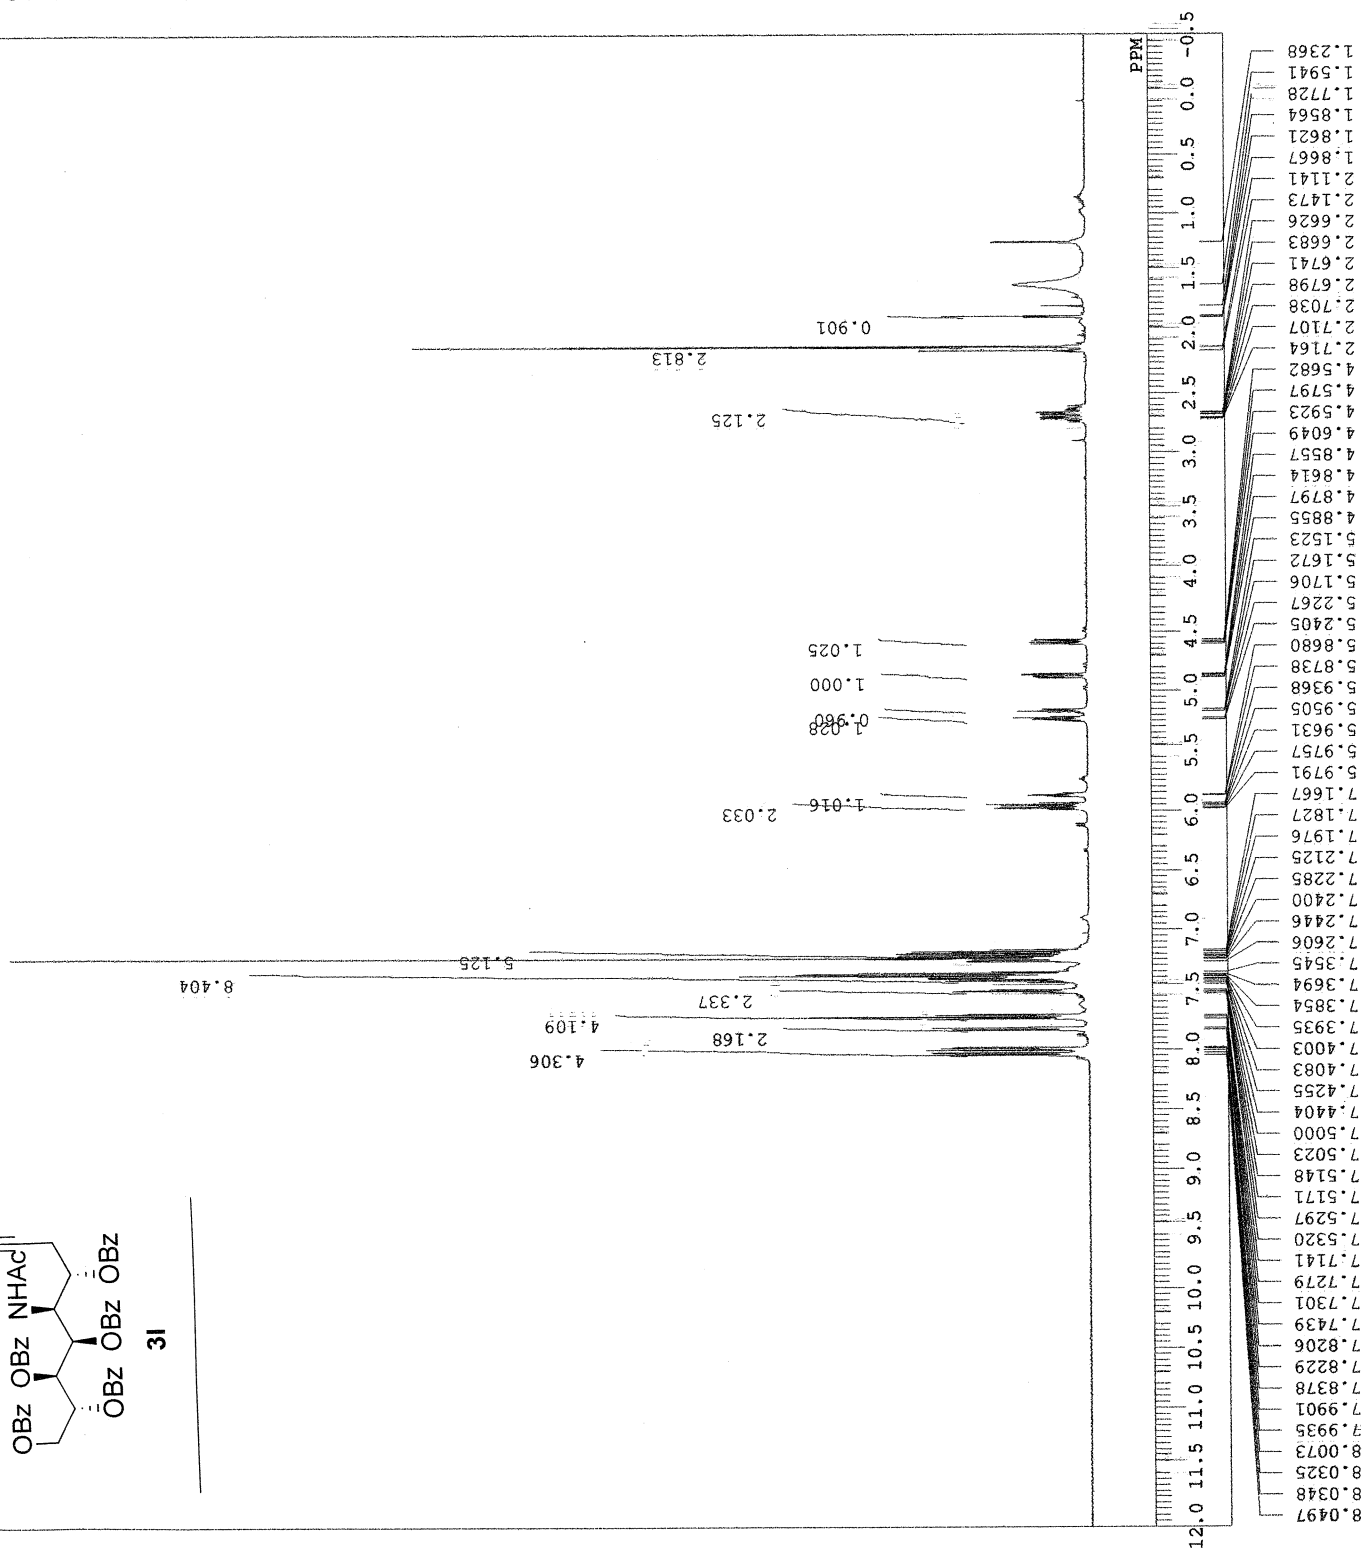



wei s-skp glucosamin carb-1-1.als

DFILE  
COMNT  
DATIM  
OBNUC  
EXMOD  
OBFREQ  
OBSSET  
OBFIN  
POINT  
FREQU  
SCANS  
ACQTM  
PD  
PW1  
IRNUC  
CTEMP  
SLVNT  
EXREF  
BF  
RGAIN

2015-04-10 23:11:28

13C  
carbon.jpg  
125.77 MHz  
7.87 kHz  
4.21 Hz  
26214  
31446.54 Hz  
12500  
0.8336 sec  
2.0000 sec  
3.40 usec  
1H  
27.7 c  
ACETN  
29.80 ppm  
0.12 Hz  
60

C:\Documents and Settings\user1\My Computer\Gouss\wei\propagation\data collection\JACS data\analyzed\wei s-skp glucosamin carb-1-1.als

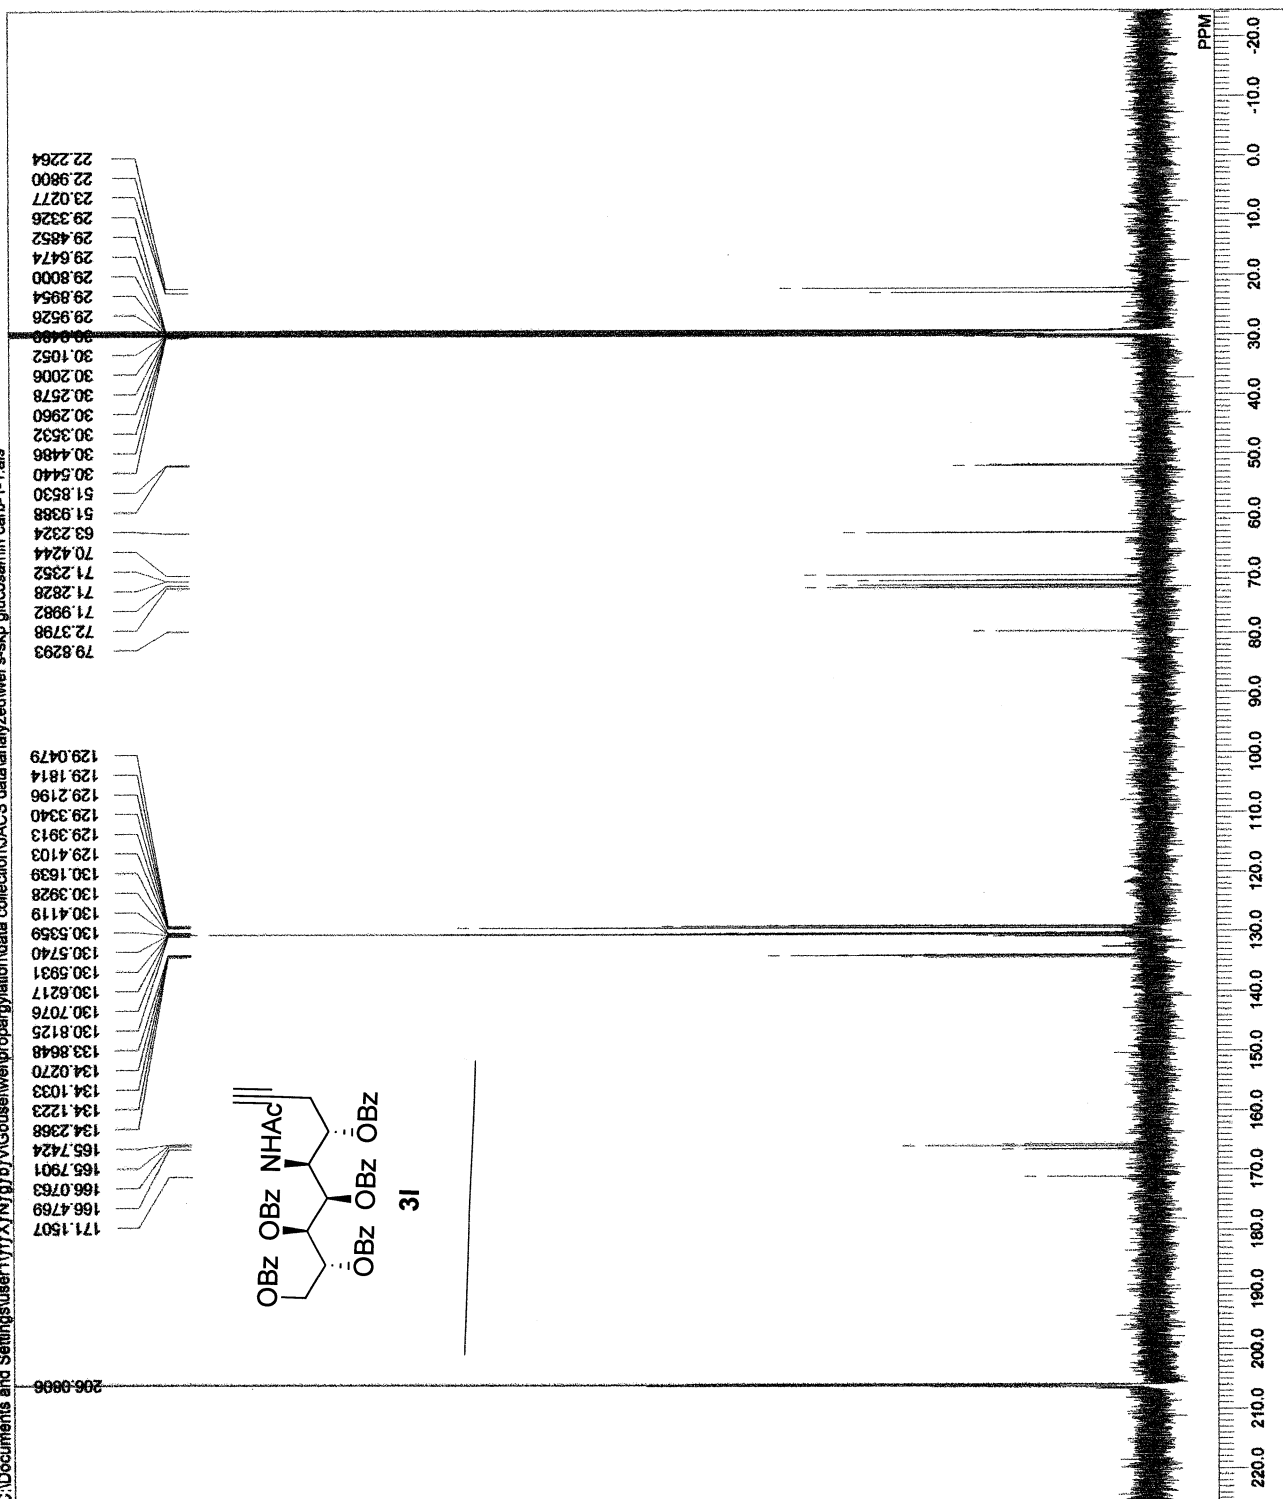

DFILE wei R-SKP glucosamin-2-1.als  
 COMNT  
 DATIM 2015-04-24 09:14:10  
 OENUC 1H  
 EXMOD proton.jxp  
 OBFRQ 500.16 MHz  
 OBSET 2.41 KHz  
 OBFIN 6.01 Hz  
 POINT 13107  
 FREQU 7507.51 Hz  
 SCANS 17  
 ACQTM 1.7459 sec  
 PD 5.0000 sec  
 PWL 5.55 usec  
 IRNUC 1H  
 CTMP 28.2 c  
 SLVNT CDCL3  
 EXREF 7.24 ppm  
 BF 0.12 Hz  
 RGAIN 30

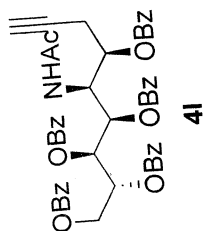

4l

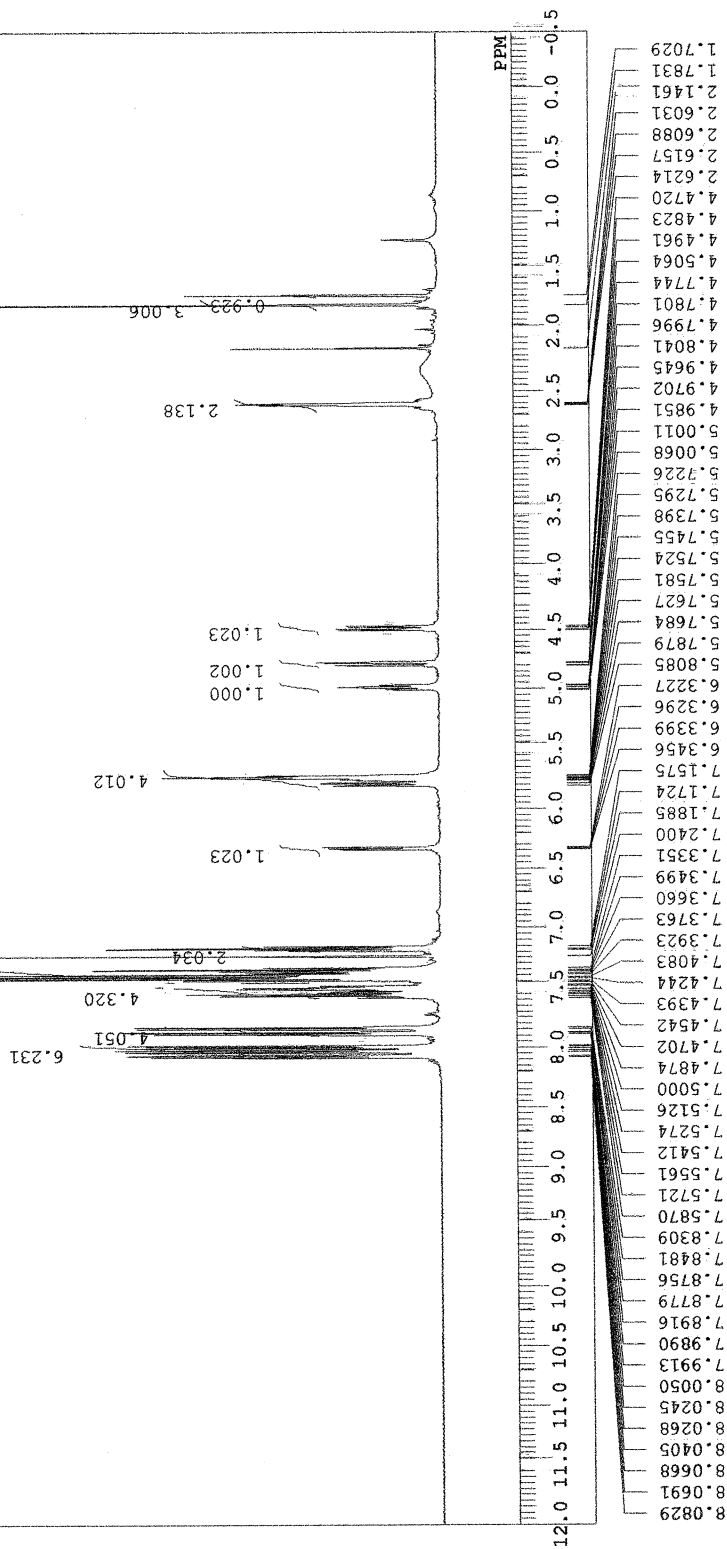

wel R-SKP Glucosamin carb\_copy1-1-1.als

DFILE  
COMINT  
DATM  
OBNUC  
EXMOD  
OBRQ  
OBSE  
OBFN  
POINT  
FREQU  
SCANS  
ACQTM  
PD  
PW1  
IRNUC  
CTEMP  
SLVNT  
EXREF  
BF  
RGAIN

2015-04-08 15:08:38

13C

carbon.kp

125.77 MHz

7.87 KHz

4.21 Hz

26214

31446.54 Hz

665

0.0000 sec

2.0000 sec

3.40 usec

1H

29.6 c

ACETN

29.80 ppm

0.12 Hz

60

C:\Documents and Settings\user1\My Documents\Goussier\property\data collection\JACS data\analyzed\wel R-SKP Glucosamin carb\_copy1-1-1.als

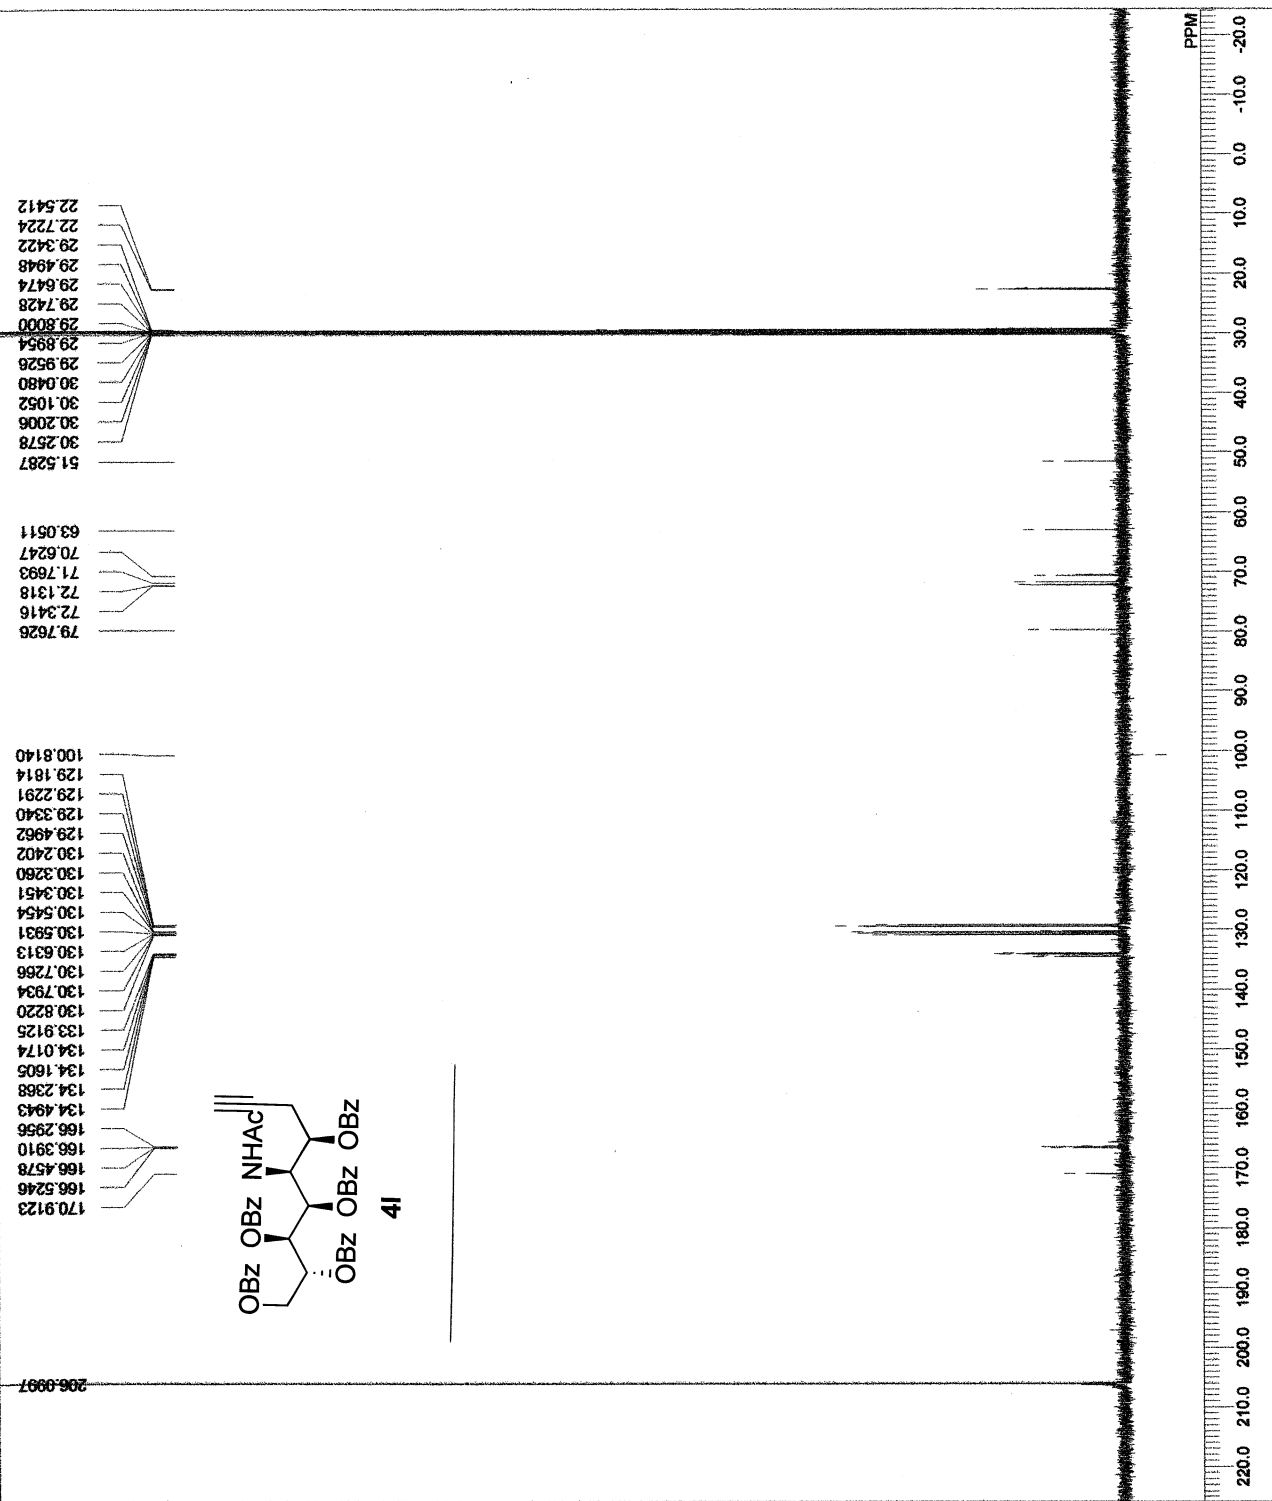

```

DFILE      wei PGF-lactose S-SKP-1-1.jdf
COMNT
DATIM      2015-05-22 20:38:01
OBNUC      1H
EXMOD      proton.jpg
OBFRQ      500.16 MHz
OBSET      2.41 KHz
OBFIN      6.01 Hz
POINT      16384
FREQU      9384.38 Hz
SCANS      12
ACQTM      1.7459 sec
PD          5.0000 sec
FW1        5.55 usec
IRNUC      1H
CTEMP      21.5 c
SLVNT      D2O
EXREF      0.00 ppm
BF          0.12 Hz
RGAIN      30

```

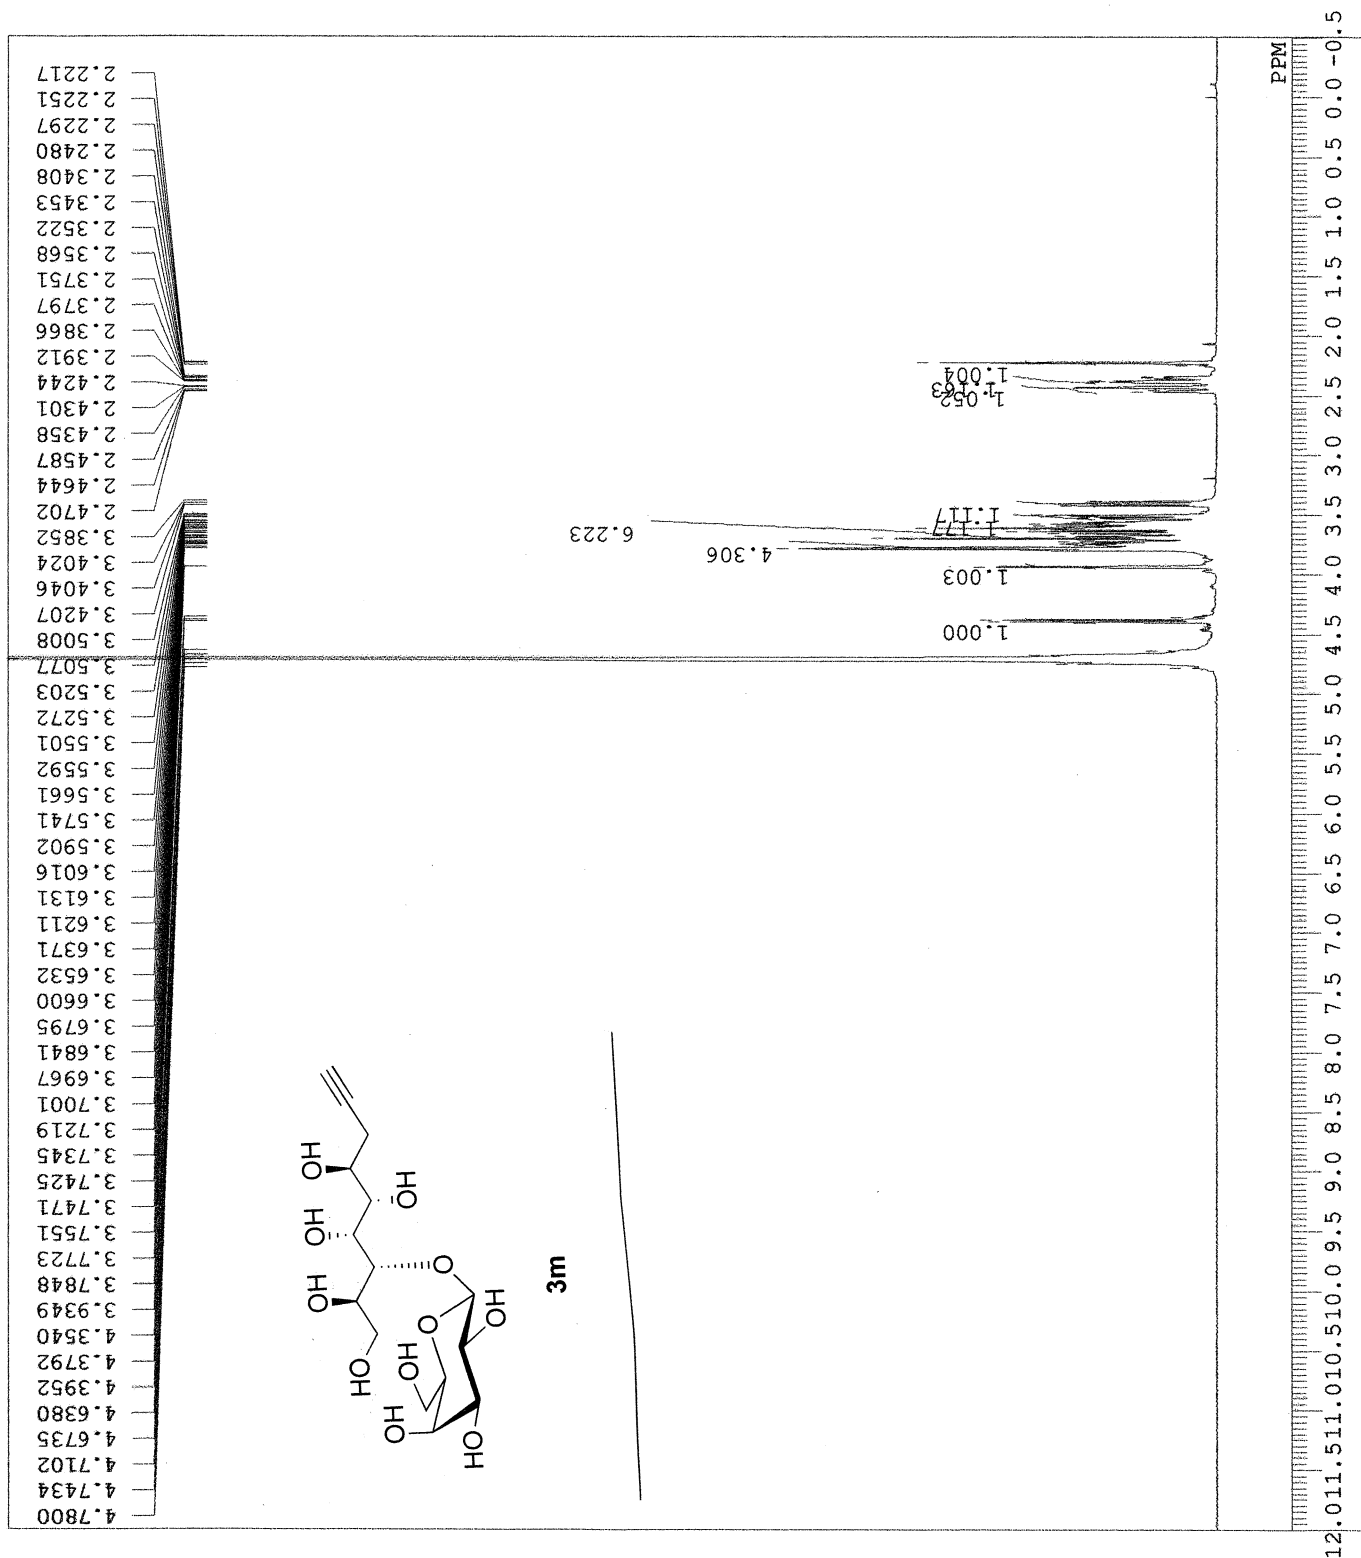

3m s-skp lactose alkyne carb-1-1.jdf

|       |            |                     |
|-------|------------|---------------------|
| DFILE | COMNT      | 2015-06-02 12:53:23 |
| DATIM | OENUC      | 13C                 |
| EXMOD | carbon.jpg |                     |
| OBFRO |            | 125.77 MHz          |
| OBFRO |            | 7.87 kHz            |
| OBFIN |            | 4.21 Hz             |
| POINT |            | 32788               |
| FREQU |            | 31446.54 Hz         |
| SCANS |            | 431                 |
| ACQTM |            | 1.0420 sec          |
| PD    |            | 2.0000 sec          |
| PW1   | 1H         | 3.40 usec           |
| IRNUC |            | 21.6 c              |
| CTEMP | D2O        |                     |
| SIVNT |            | 49.50 ppm           |
| EXREF |            | 0.12 Hz             |
| BF    |            | 76                  |
| RGAIN |            |                     |

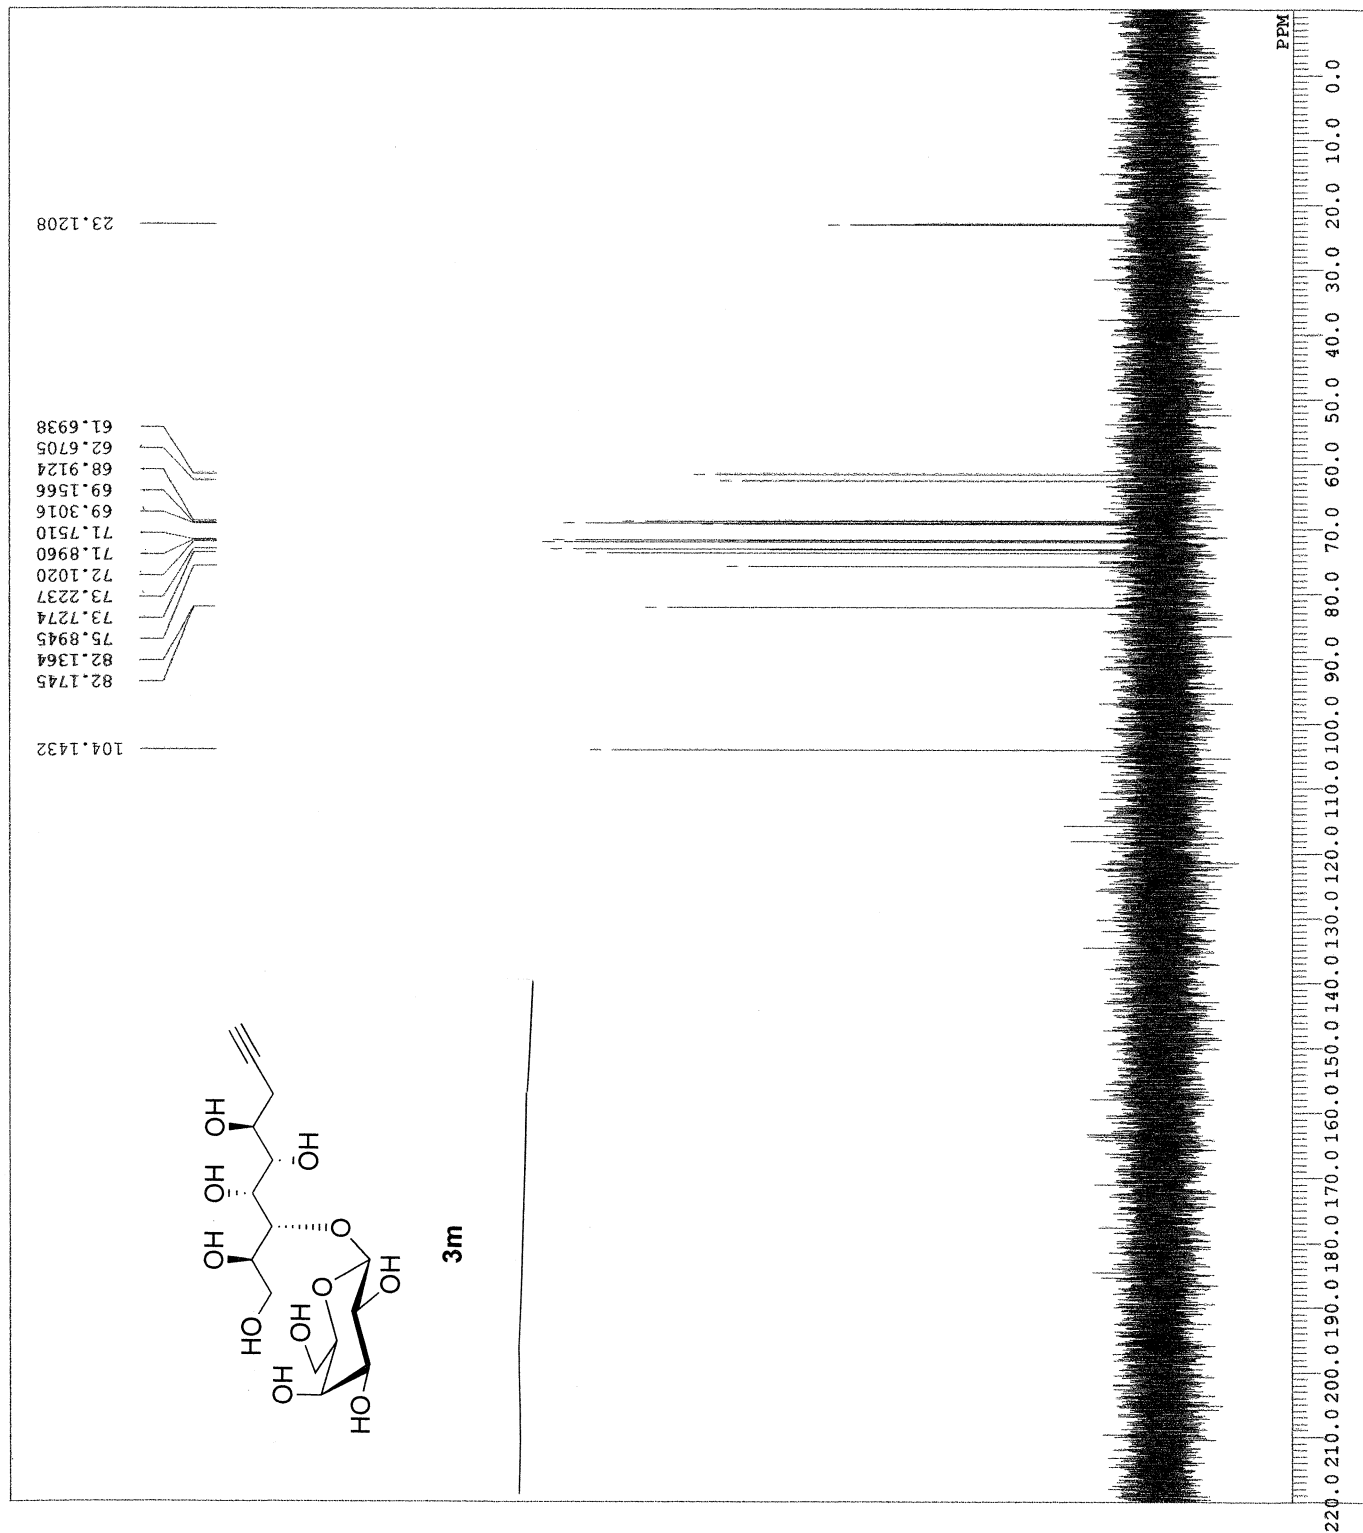

4m R-skp lactose alkyne.als  
 2015-06-15 16:00:01  
 1H  
 proton.jxp  
 500.16 MHz  
 2.41 KHz  
 6.01 Hz  
 13107  
 7507.51 Hz  
 8  
 1.7459 sec  
 5.0000 sec  
 5.55 usec  
 1H  
 21.2 c  
 4.65 ppm  
 0.12 Hz  
 30

DFILE  
 COMNT  
 DATIM  
 OBNUC  
 EXMOD  
 OBFRQ  
 OBSET  
 OBFIN  
 POINT  
 FREQU  
 SCANS  
 ACQTM  
 PD  
 PW1  
 IRNUC  
 CTEMP  
 SLVNT  
 EXREF  
 BF  
 RGAIN

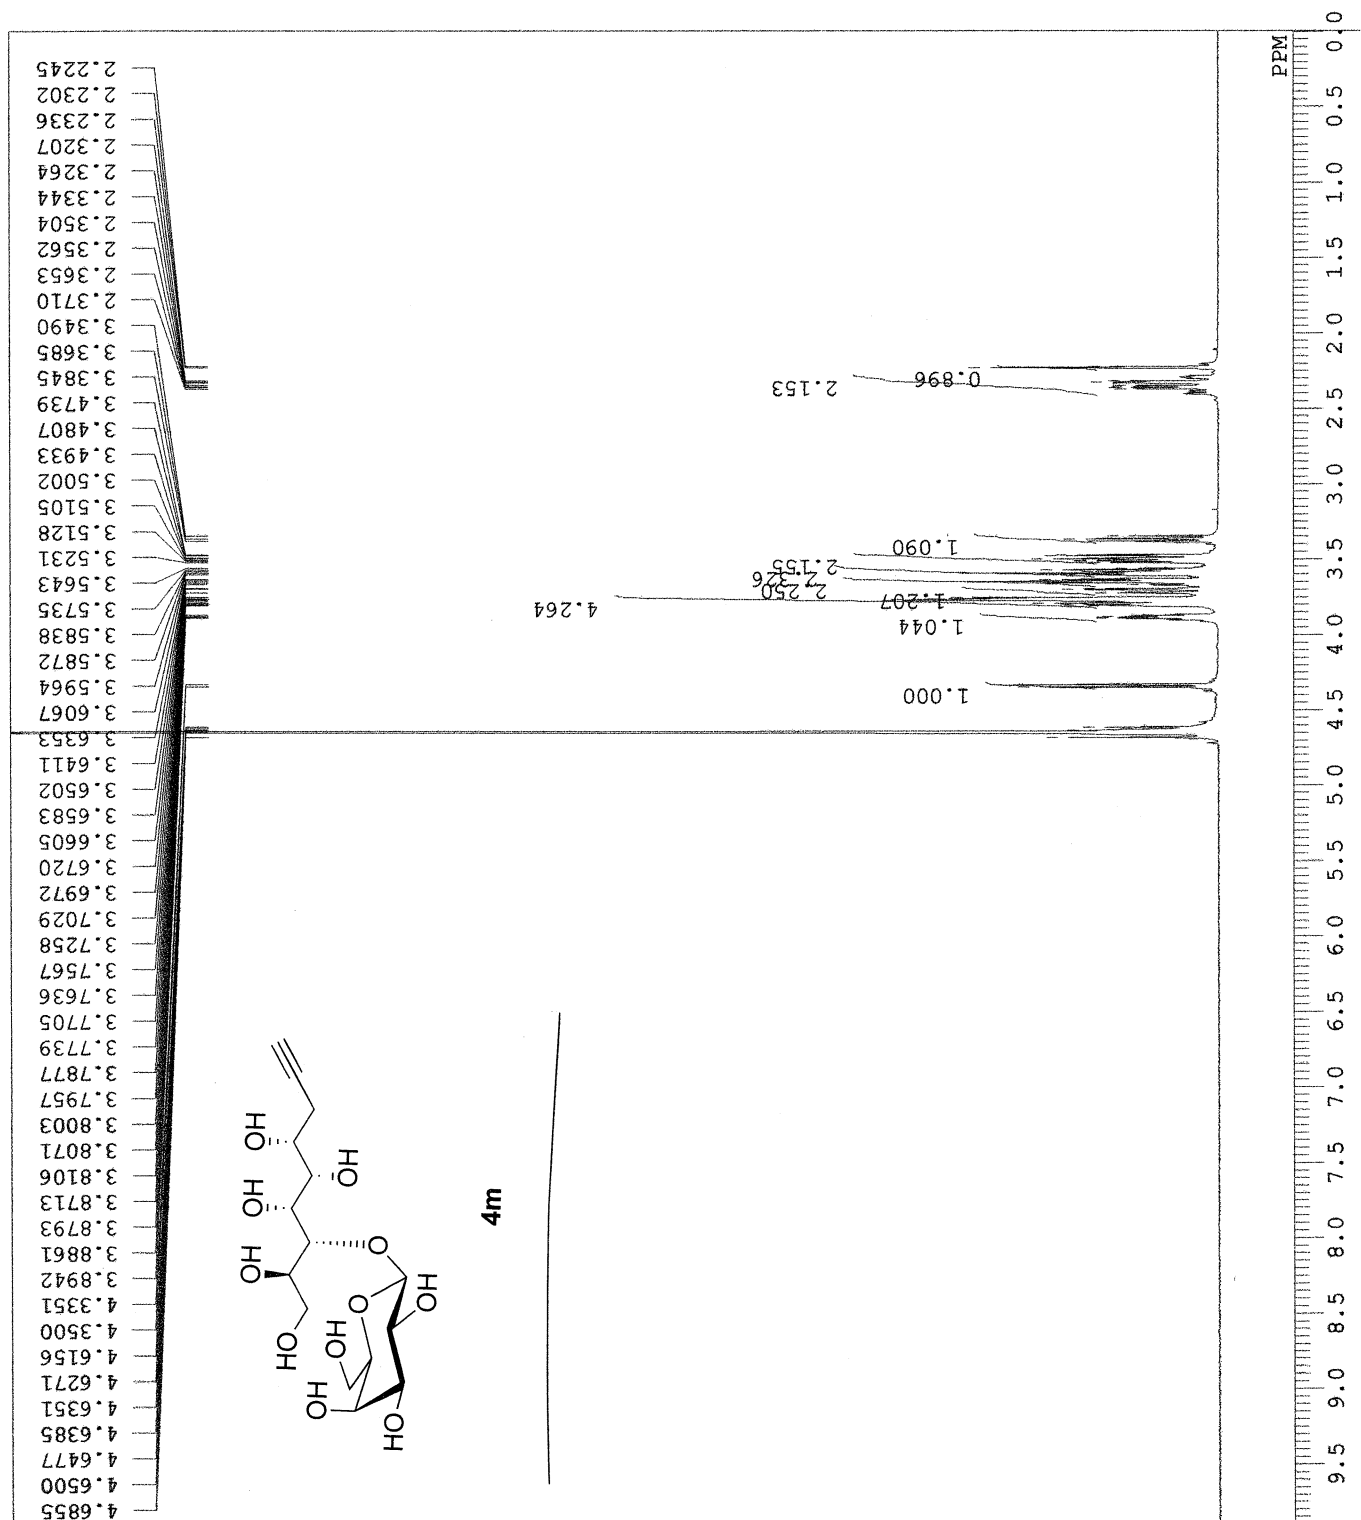

DFILE 4m R-skp lactose carb-1-1.jdf

COMNT 2015-06-15 16:01:31  
DATIM 13C  
OENUC carbon.jpg  
EXMOD 125.77 MHz  
OBFRQ 7.87 kHz  
OBSET 4.21 Hz  
OBFIN 32767  
POINT 39308.18 Hz  
FREQU 242  
SCANS 0.8336 sec  
ACQTM 2.0000 sec  
PD 3.40 usec  
PWL 1H  
IRNUC 21.5 c  
CTEMP D2O  
SIVNT 49.50 ppm  
EXREF 0.12 Hz  
BF 60  
RGAIN

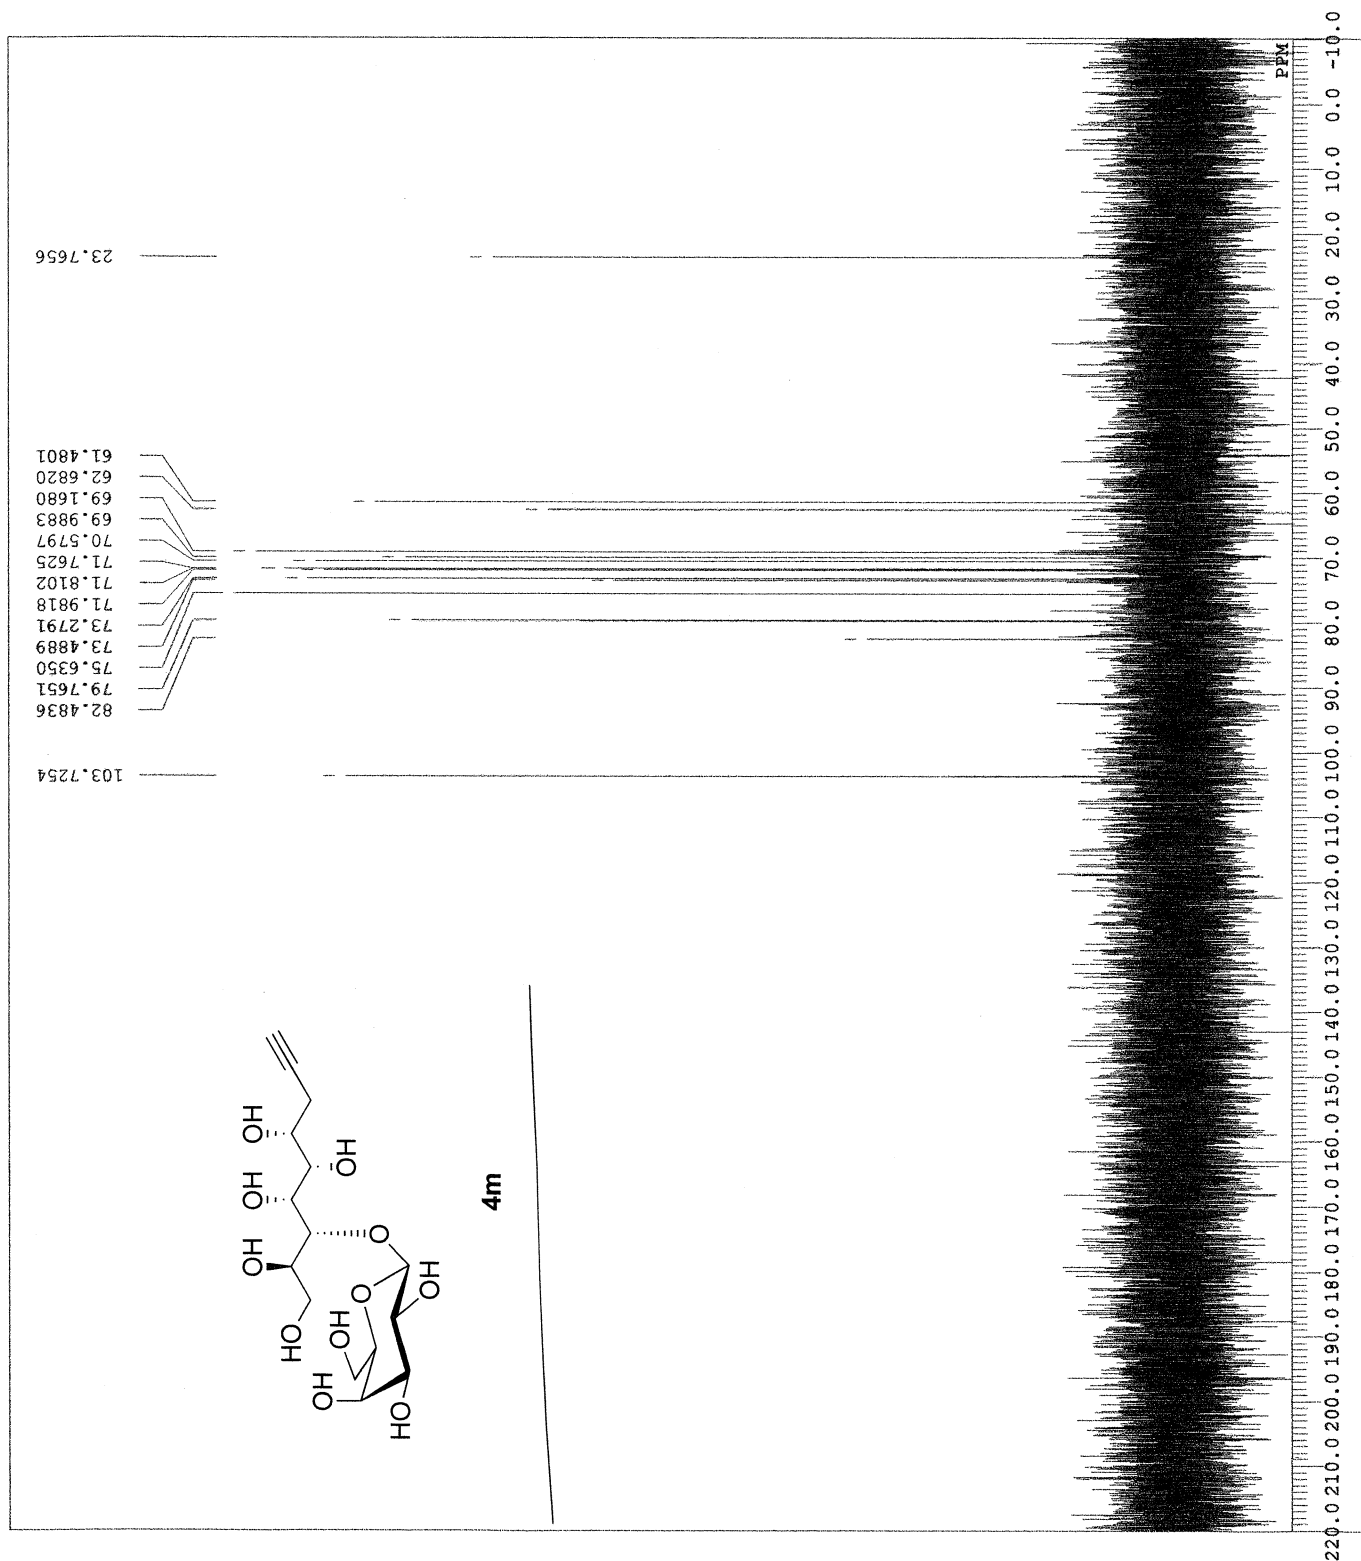

C:\Documents and Settings\user1\ffXfNfgfbfv\Gousei\wei\propargylation\last\_step\dibromo\wei dibromo determin-1-1-jdf

DFILE  
COMMT  
DATIM 2014-11-08 13:38:16  
OBNUC 1H  
EXMOD proton.jpg  
OBFRQ 500.16 MHz  
OBSET 2.41 KHz  
OBFIN 6.01 Hz  
POINT 16384  
FREQU 9384.38 Hz  
SCANS 6  
ACQTM 1.7459 sec  
PD 5.0000 sec  
PWL 5.55 usec  
IRNUC 1H  
CTEMP 23.0 C  
SLVNT CD3OD  
EXREF 3.30 ppm  
BF 0.12 Hz  
RGAIN 32

5.8137  
4.9285  
4.8975  
3.8955  
3.8852  
3.8726  
3.8634  
3.8520  
3.8451  
3.8165  
3.7867  
3.7672  
3.6882  
3.6756  
3.6424  
3.6310  
3.6207  
3.6092  
3.4546  
3.4351  
3.4237  
3.4168  
3.4054  
3.3000  
3.2885  
3.2817  
3.2611  
3.2462  
2.4354  
2.4251  
2.4102  
2.3999  
1.6189  
1.5937  
1.5708

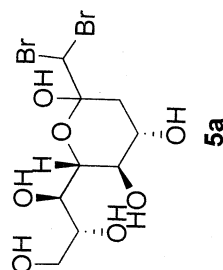

2.260

2.043

1.188

1.080

1.000

1.008

12.0 11.5 11.0 10.5 10.0 9.5 9.0 8.5 8.0 7.5 7.0 6.5 6.0 5.5 5.0 4.5 4.0 3.5 3.0 2.5 2.0 1.5 1.0 0.5 0.0 -0.5



DFILE wei man dibromo carb-1-1.jdf

COMNT  
DATIM 2015-08-20 16:06:46  
OBNUC 13C  
EXMOD carbon.jpg  
OBFRQ 125.77 MHz  
OBSET 7.87 KHz  
OBFIN 4.21 Hz  
POINT 32767  
FREQU 39308.18 Hz  
SCANS 68  
ACQTM 0.8336 sec  
PD 2.0000 sec  
PW1 3.40 usec  
IRNUC 1H  
CTEMP 21.5 c  
SLVNT CD3OD  
EXREF 49.00 ppm  
BF 0.12 Hz  
RGAIN 60

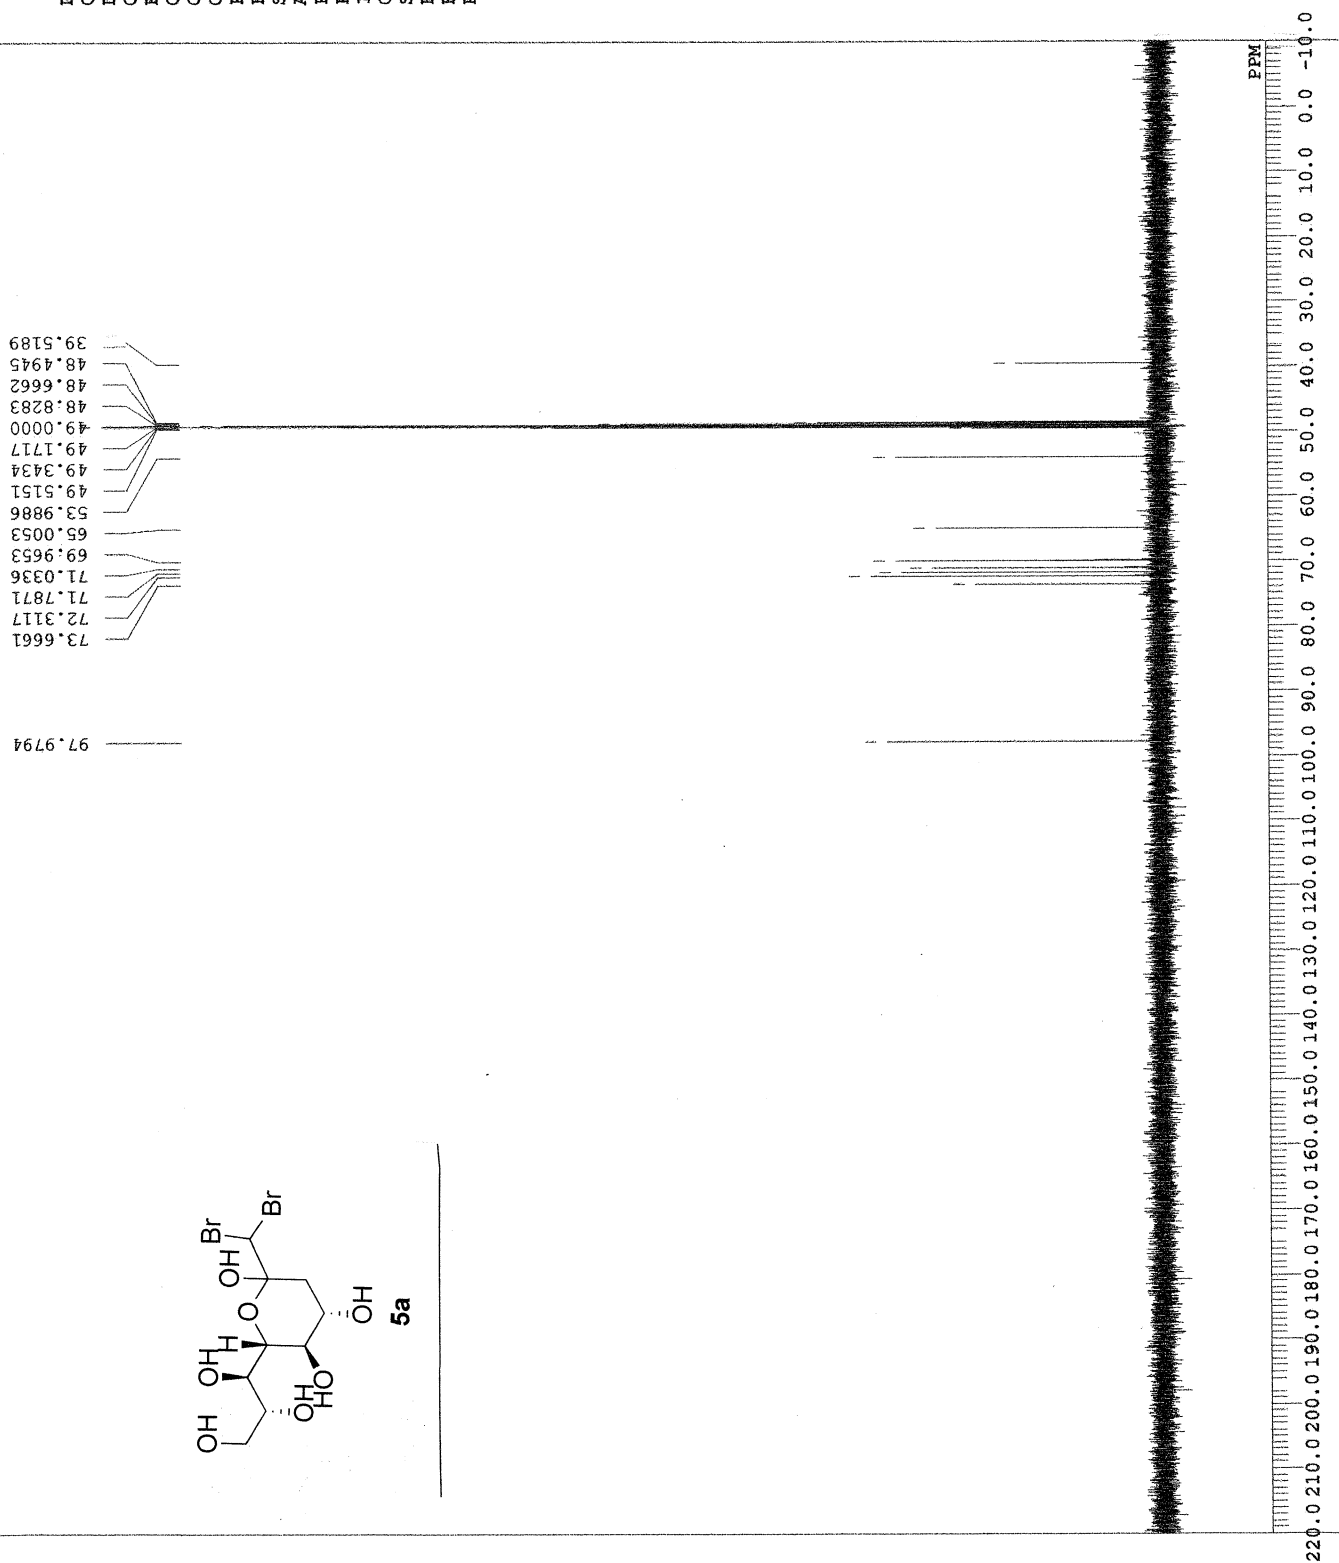

DFILE  
 COMNT  
 DATIM  
 OBNUC  
 EXMOD  
 OBFRQ  
 OBSET  
 OBFIN  
 POINT  
 FREQU  
 SCANS  
 ACQTM  
 PD  
 PW1  
 IRNUC  
 CTEMP  
 SLVNT  
 EXREF  
 BF  
 RGAIN

wei kdn large scale .jdf  
 2015-08-14 13:33:28  
 1H  
 proton.jpg  
 500.16 MHz  
 2.41 KHz  
 6.01 Hz  
 16384  
 9384.38 Hz  
 16  
 1.7459 sec  
 5.0000 sec  
 5.55 usec  
 1H  
 21.4 C  
 D2O  
 4.65 ppm  
 0.12 Hz  
 36

C:\Documents and Settings\user1\My Documents\Goussell\propagation\data collection\NATURE DATA\final one\wei kdn large scale .jdf

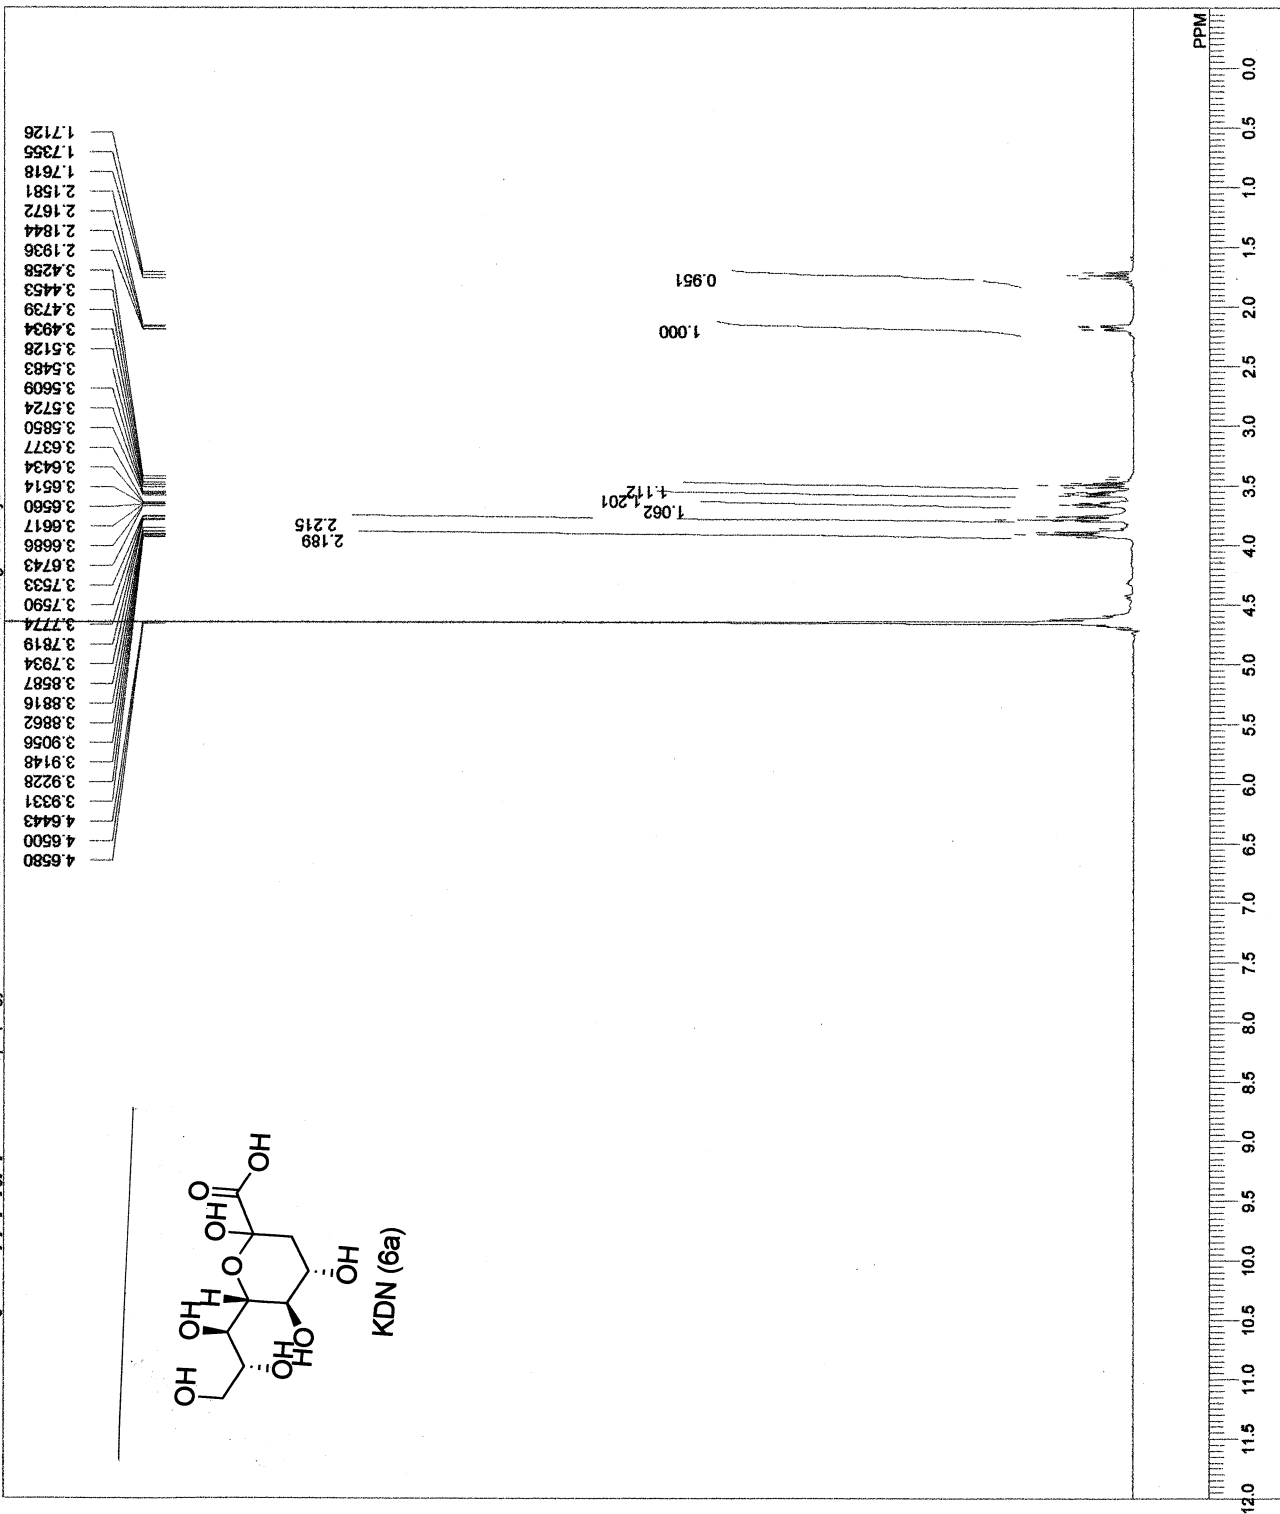

DFILE kdn acid fresh carb-1-1.jdf  
 COMINT  
 DATIM 2015-08-23 17:25:14  
 OBNUC 13C  
 EXMOD carbon.jpg  
 OBFRQ 125.77 MHz  
 OBSET 7.87 KHz  
 OBFIN 4.21 Hz  
 POINT 32767  
 FREQU 39308.18 Hz  
 SCANS 2214  
 ACQTM 0.8336 sec  
 PD 2.0000 sec  
 PW1 3.40 usec  
 1H 21.7 c  
 D2O  
 SLVNT 49.50 ppm  
 EXREF 0.12 Hz  
 BF 60  
 RGAIN

C:\Documents and Settings\user1\My Documents\Gausshw\propargylation\data collection\NATURE DATA\final one\static acid\kdn acid fresh carb-1-1.jdf

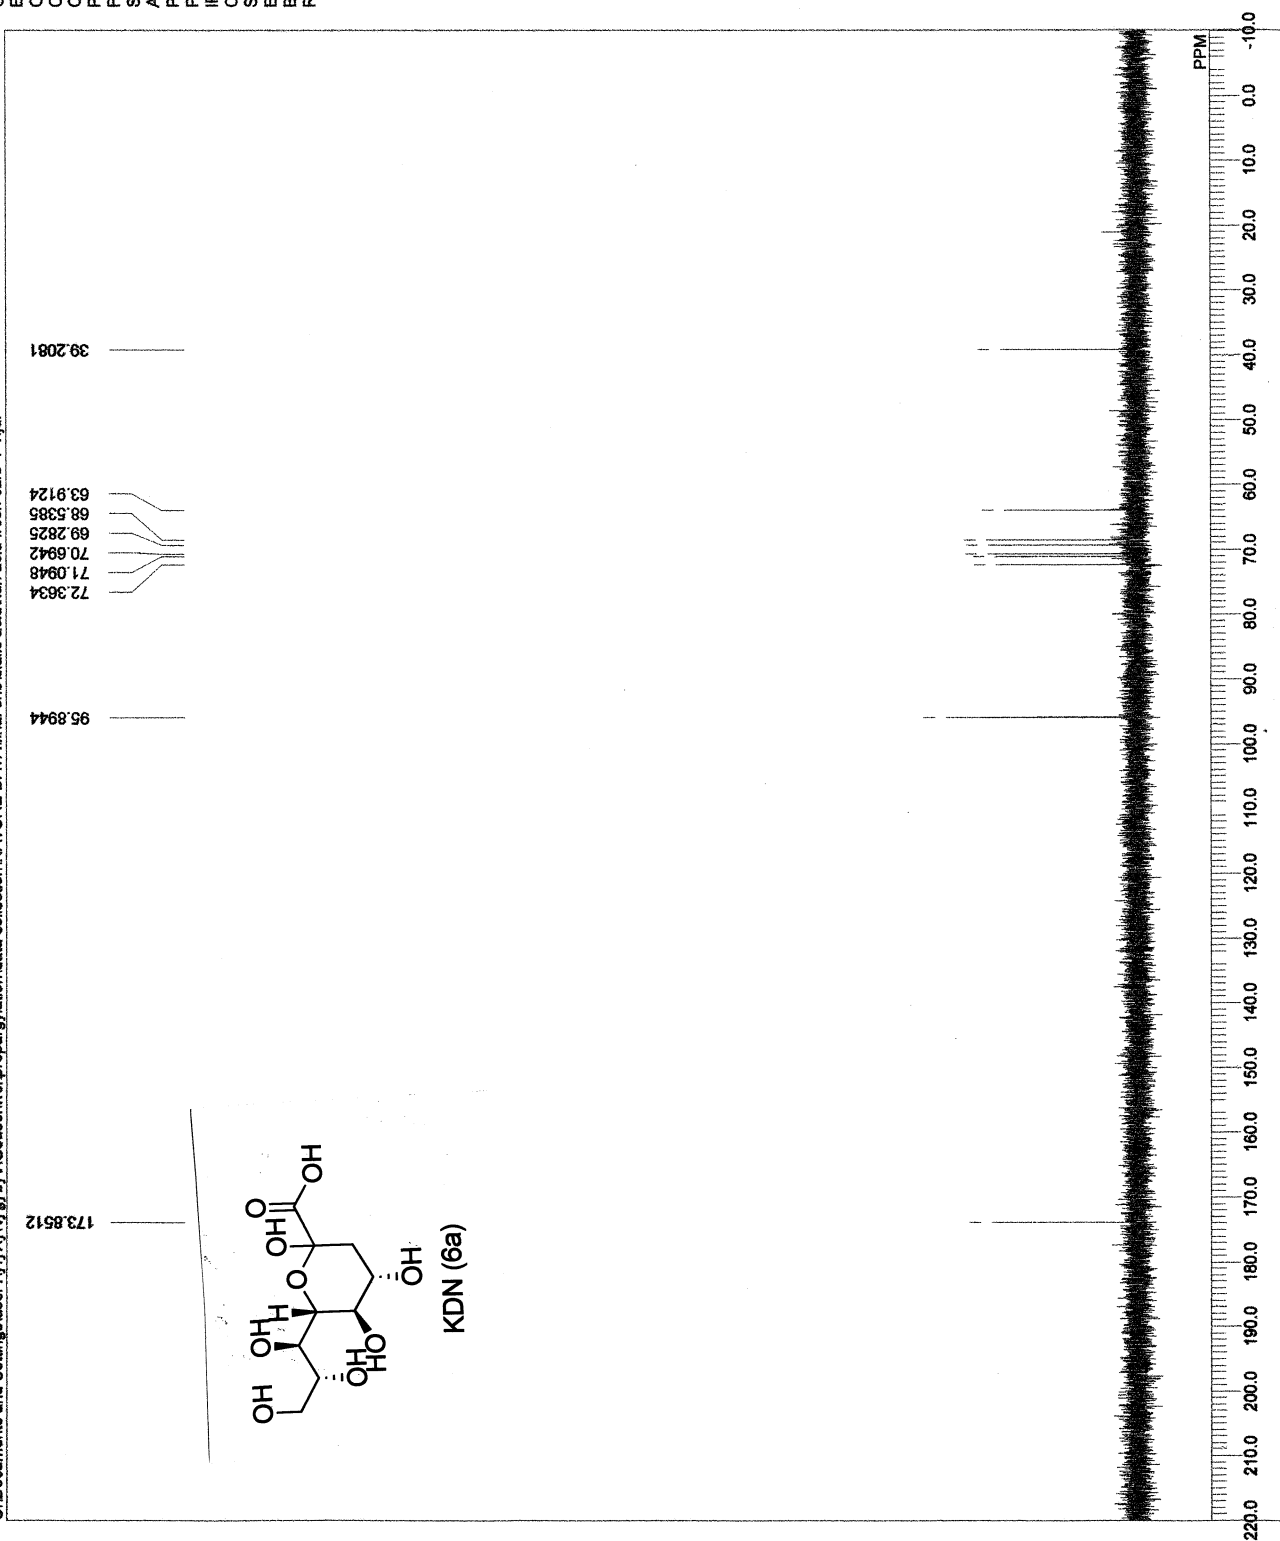

DFILE wei Neu5Ac HPLC new-1-1.als  
 COMNT 2015-05-12 20:32:38  
 DATIM 1H  
 EXMOD proton.jxp  
 EXFRQ 500.16 MHz  
 OBSET 2.41 KHz  
 OBFIN 6.01 Hz  
 POINT 13107  
 FREQU 7507.51 Hz  
 SCANS 14  
 ACQTM 1.7459 sec  
 PD 5.0000 sec  
 PWL 5.55 usec  
 IRNUC 1H  
 CTMP 21.5 c  
 SLVNT D2O  
 EXREF 4.65 ppm  
 BF 0.12 Hz  
 RGAIN 30

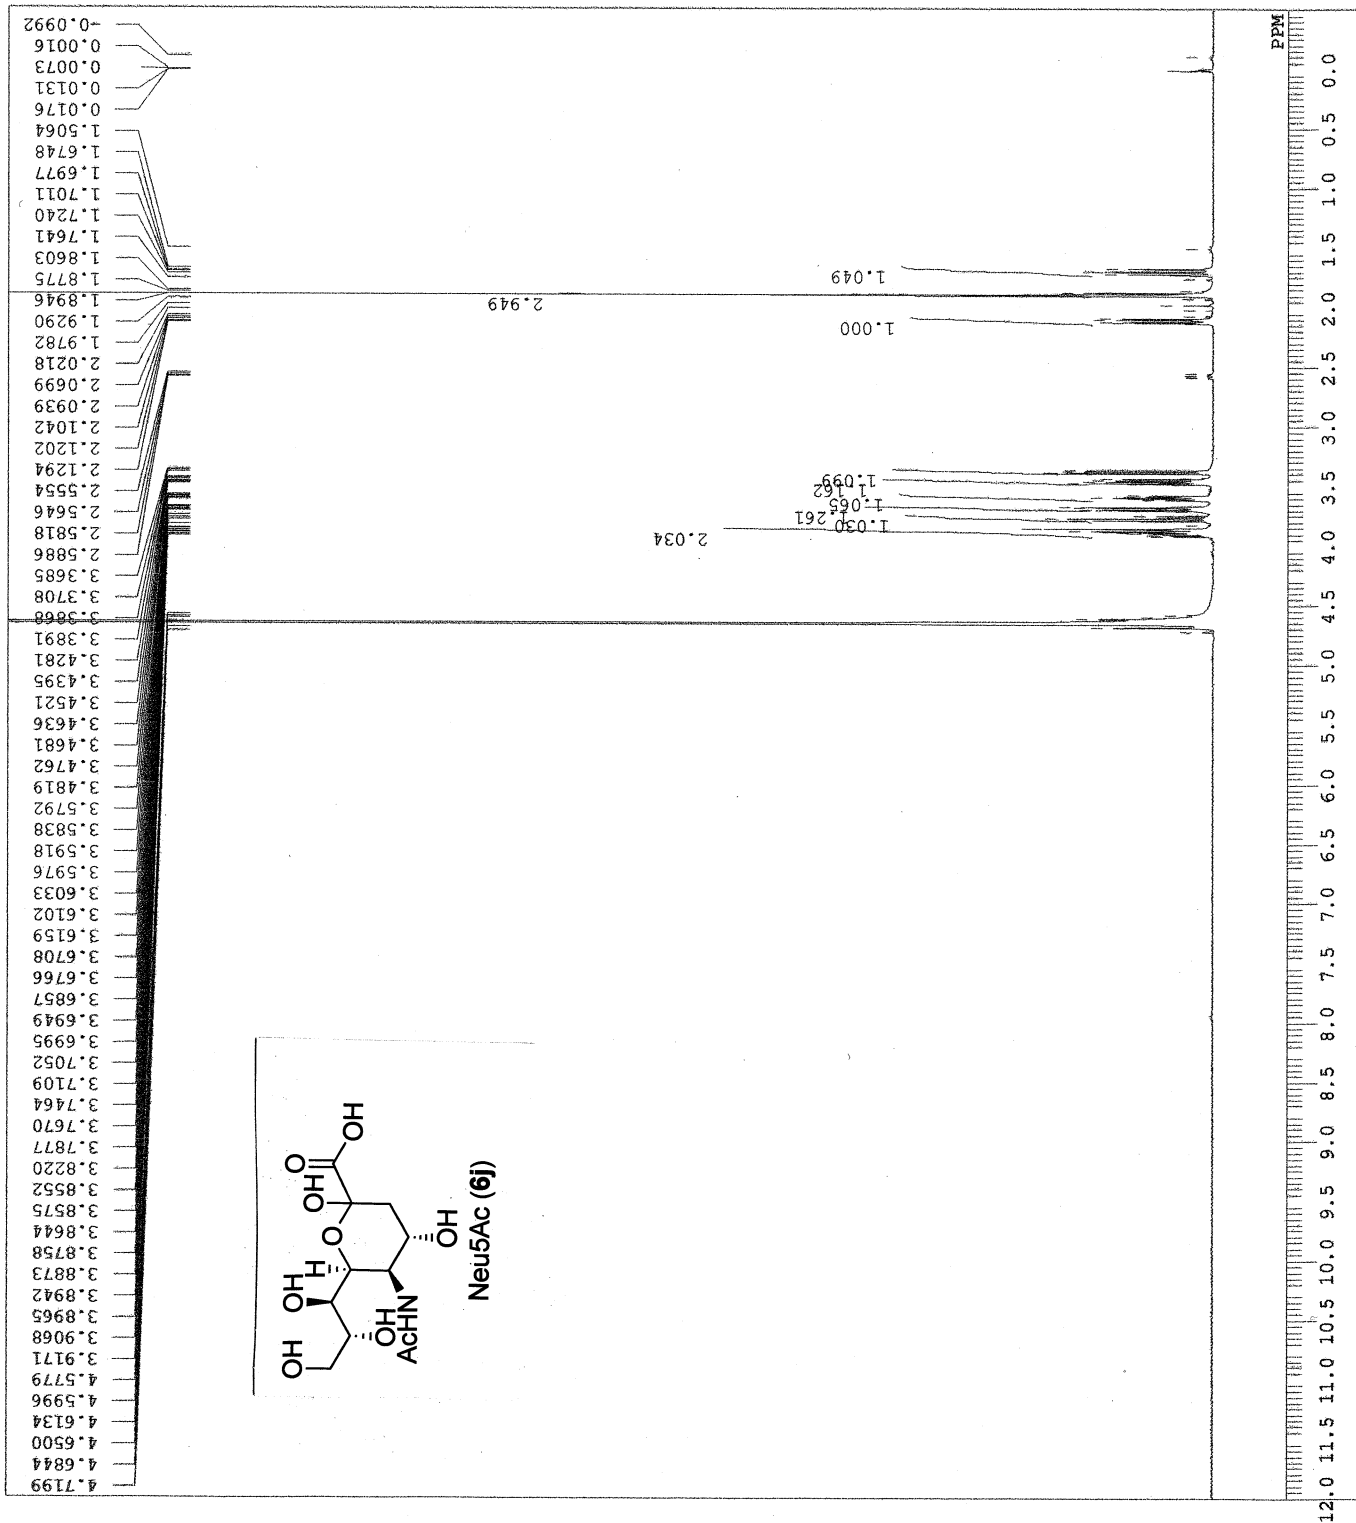

6h

DFILE wei Neu5Ac car-1-1.jdf  
 COMNT 2015-08-21 01:45:44  
 DATIM 13C  
 OBNUC carbon.jxp  
 EXMOD 125.77 MHz  
 OBRQ 7.87 KHz  
 OBSF 4.21 Hz  
 OBFN 32767  
 POINT 39308.18 Hz  
 FREQU 8000  
 SCANS 0.8336 sec  
 ACQTM 2.0000 sec  
 PD 3.40 usec  
 PW1 1H  
 IRNUC 21.7 c  
 CTEMP D2O  
 SLVNT 49.50 ppm  
 EXREF 0.12 Hz  
 BF 60  
 RGAIN

C:\Documents and Settings\user1\My Documents\Goussell\propagation\data collection\NATURE DATA\carb\wei Neu5Ac car-1-1.jdf

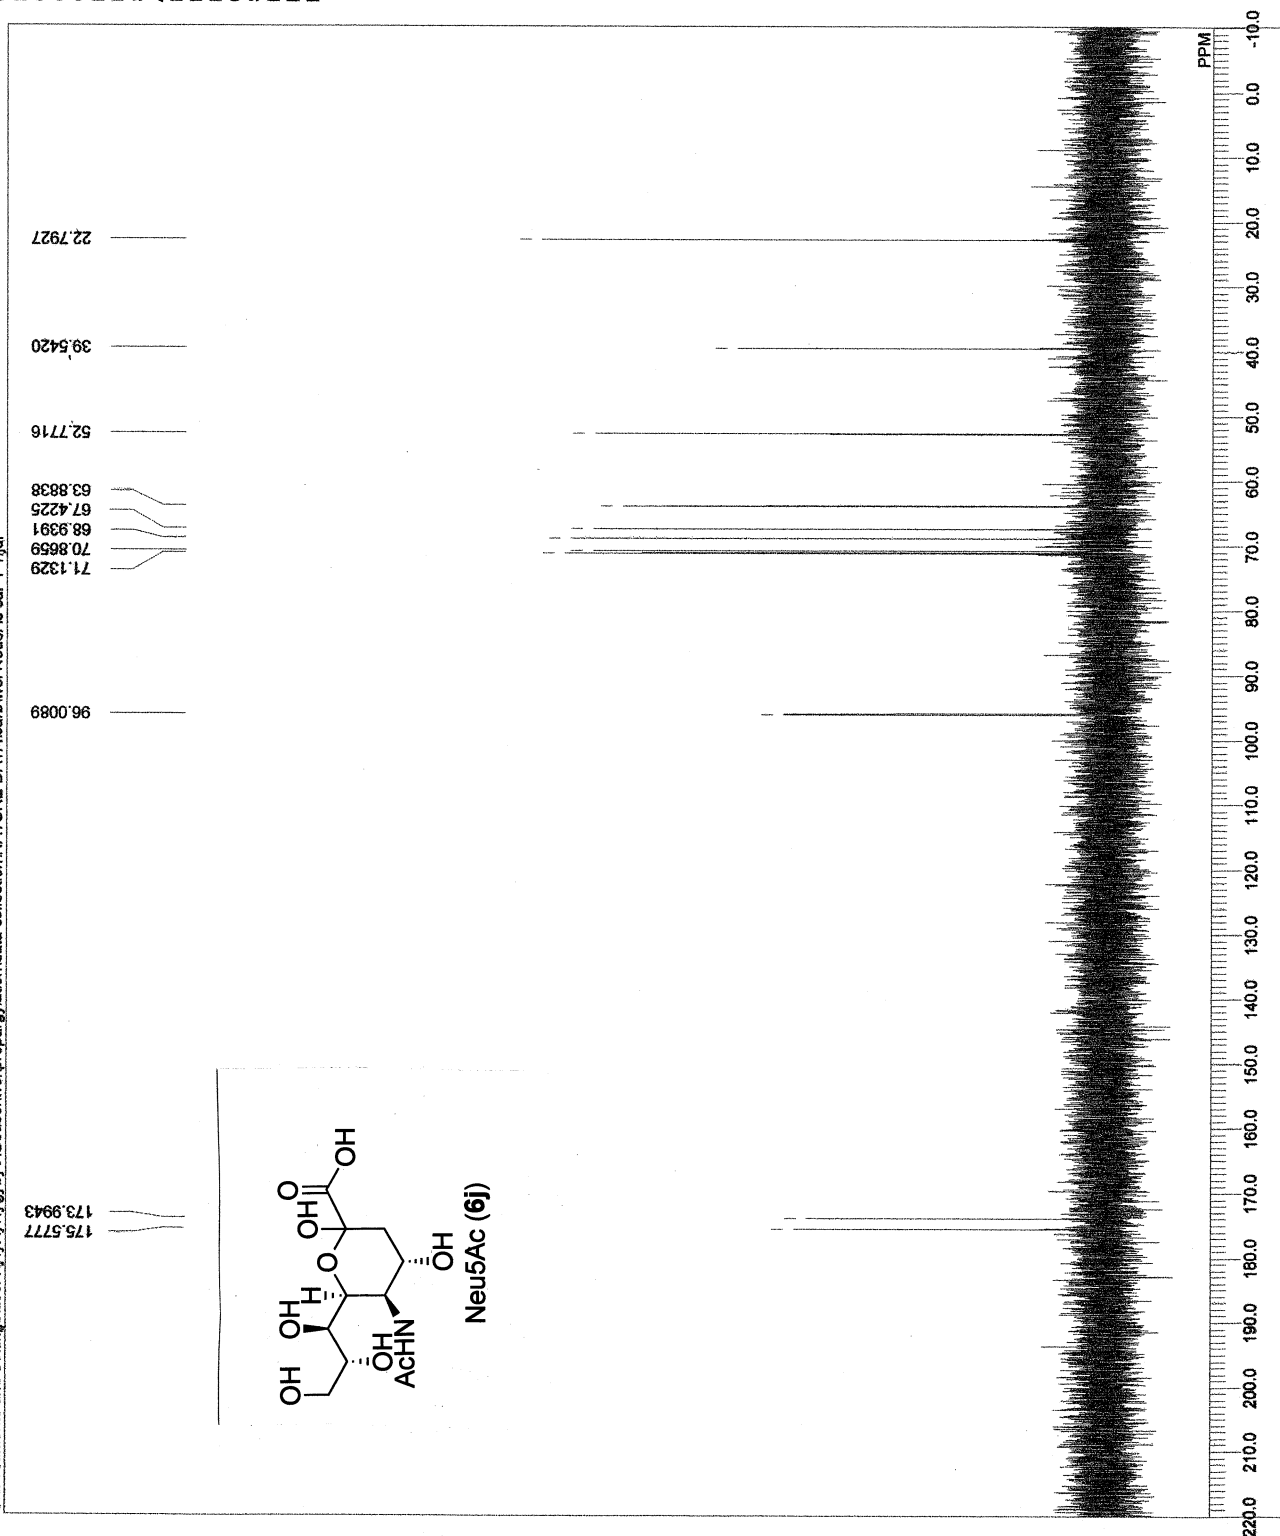

DFILE COMNT DATIM OBNUC EXMOD OBFRQ OBSET OBFIN POINT FREQU SCANS ACQTM PD PW1 IIRNUC CTEMP SLVNT EXXREF BBF RGAIN

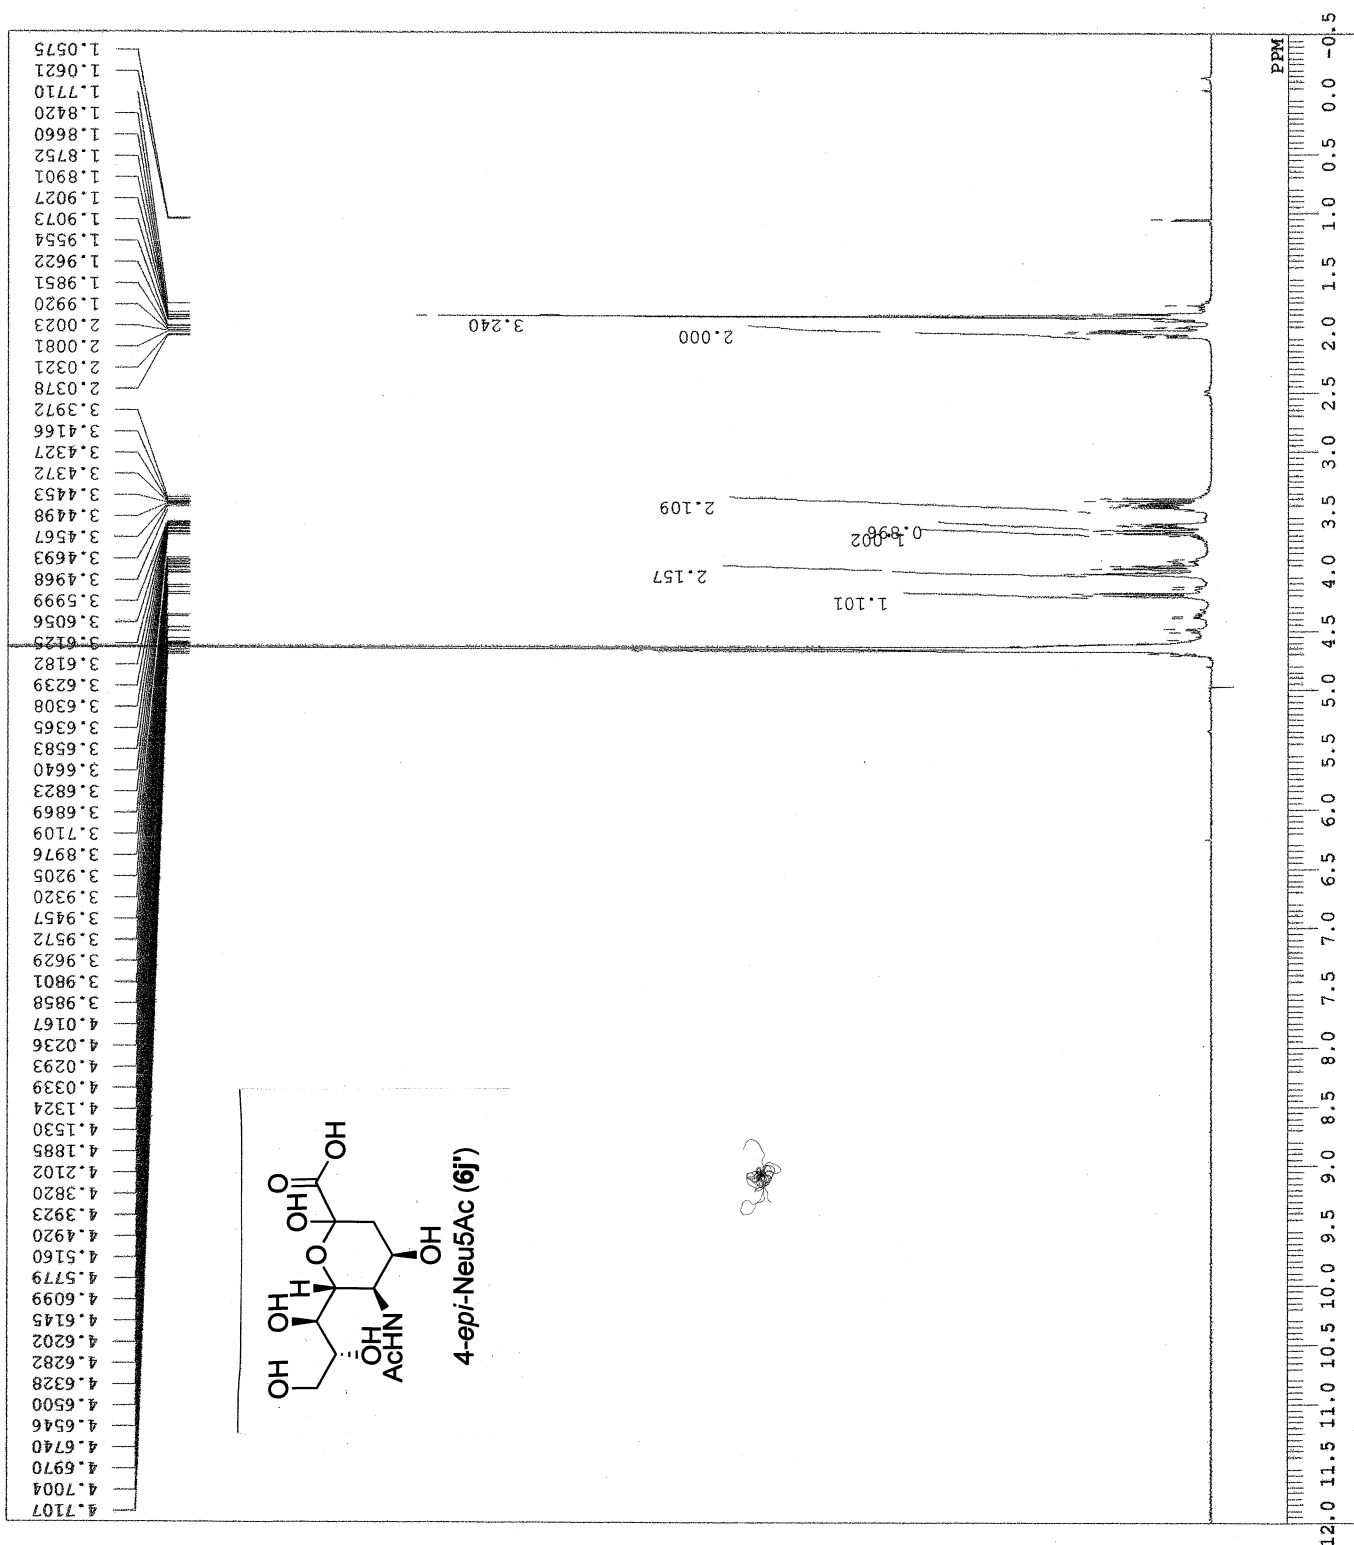

DFILE COMMT  
 DATIM 2015-09-04 00:01:34  
 OBNUC 13C  
 EXMOD carbon.jpg  
 OBFRQ 125.77 MHz  
 OBSF 7.87 KHz  
 OBFN 4.21 Hz  
 POINT 32767  
 FREQU 39308.18 Hz  
 SCANS 10313  
 ACQTM 0.0000 sec  
 PD 2.0000 sec  
 PW1 3.40 usec  
 1H  
 IRNUC 21.5 c  
 CTEMP D2O  
 SLVNT 49.50 ppm  
 EXREF 0.12 Hz  
 BF 60  
 RGAIN

\\172.20.1.201\users\delta\Documents\JEOL\data\wei epi Neu carb\_copy1-1-1.jdf

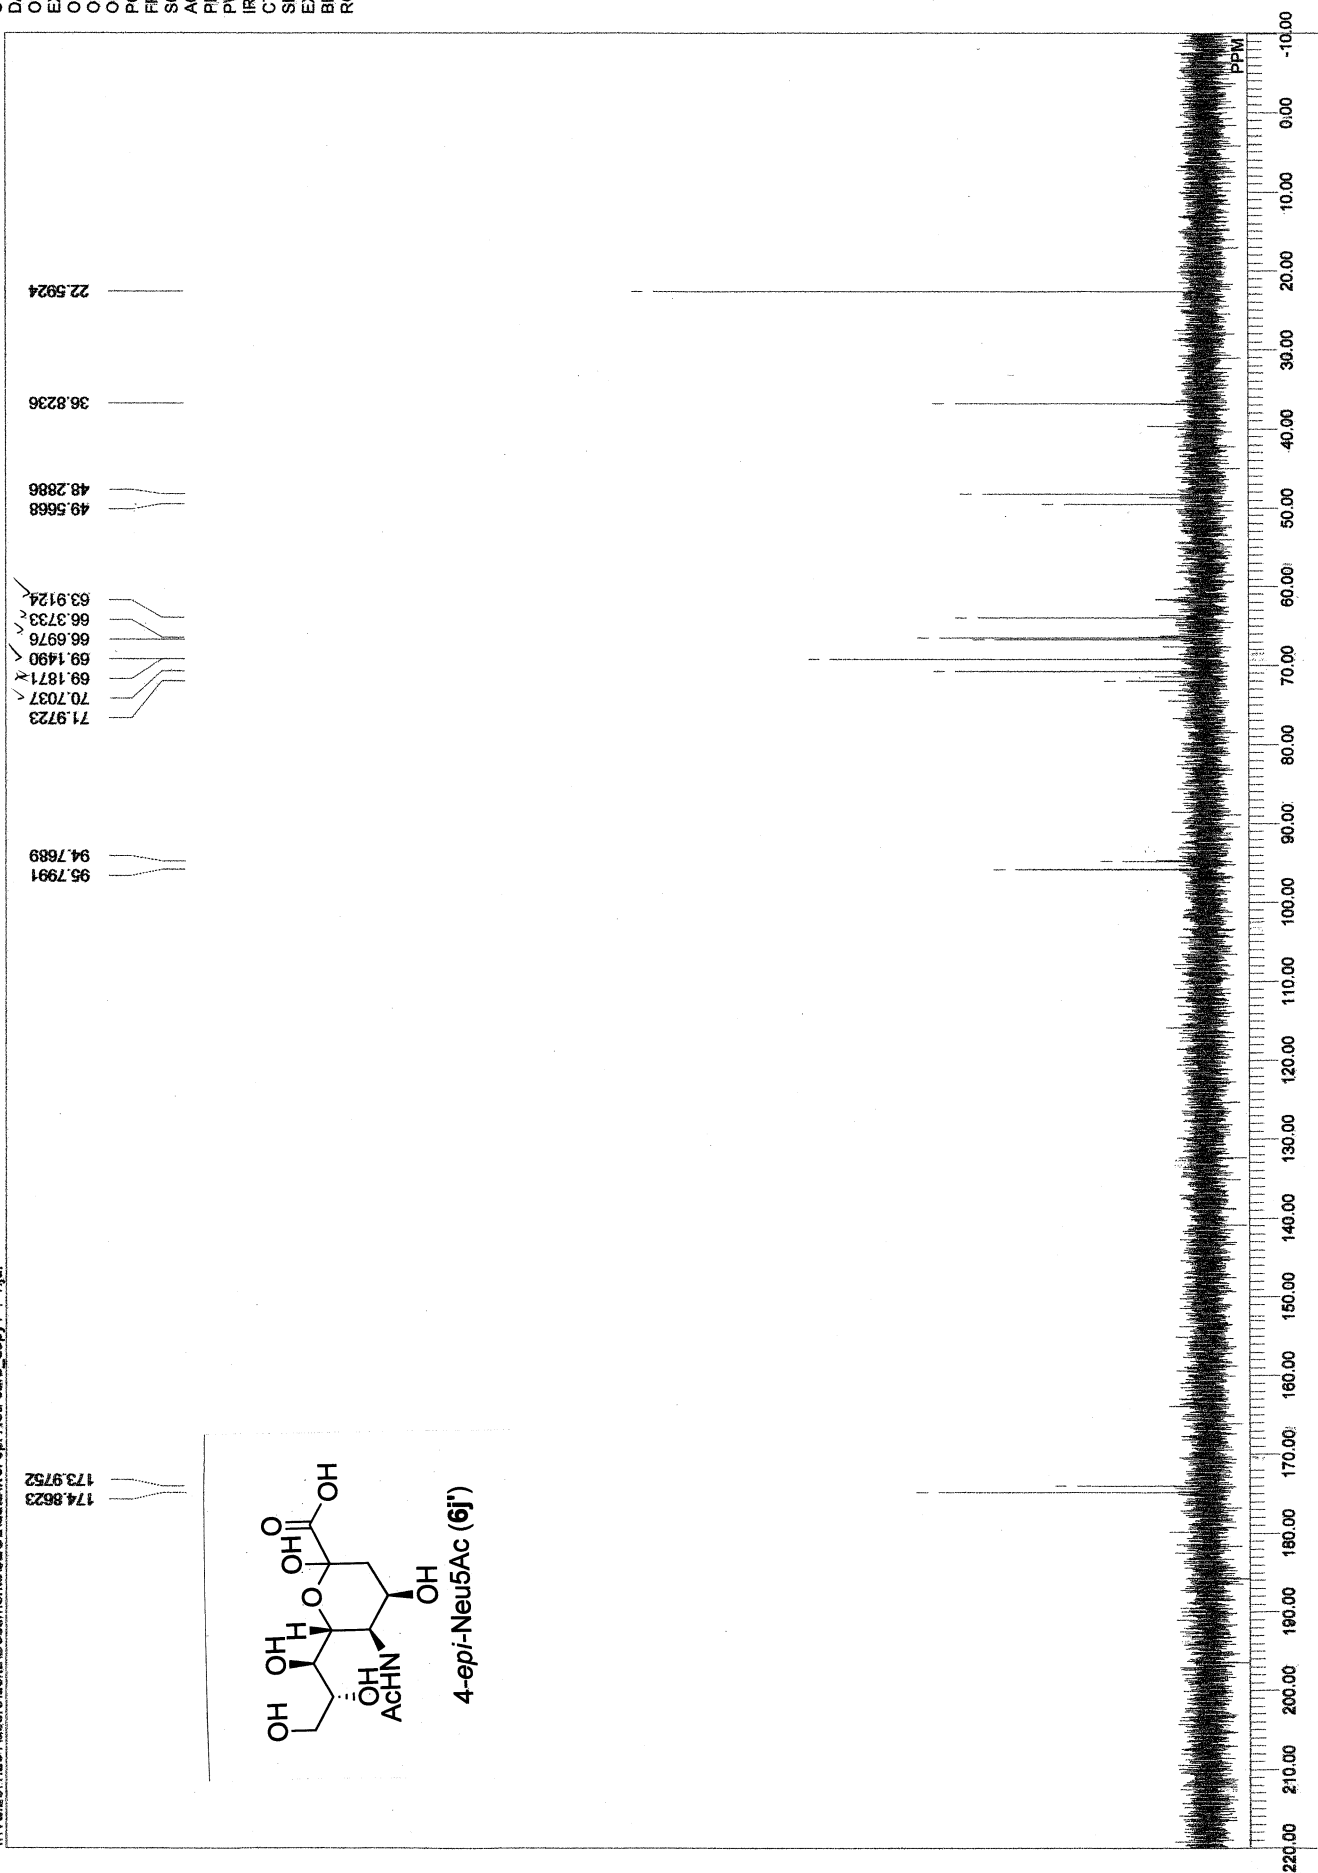

DFILE wei lyxose acid-new.jdf  
 COMNT  
 DATIM 2015-08-31 23:15:07  
 OBNUC 1H  
 EXMOD proton.jxp  
 OBFRQ 500.16 MHz  
 OBSET 2.41 KHz  
 OBFIN 6.01 Hz  
 POINT 16384  
 FREQU 9384.38 Hz  
 SCANS 14  
 ACQTM 1.7459 sec  
 PD 5.0000 sec  
 PW1 5.55 usec  
 IRNUC 1H  
 CTEMP 21.4 C  
 SLVNT D2O  
 EXREF 4.65 ppm  
 BF 0.12 Hz  
 RGAIN 34

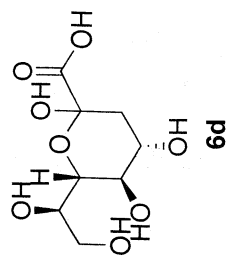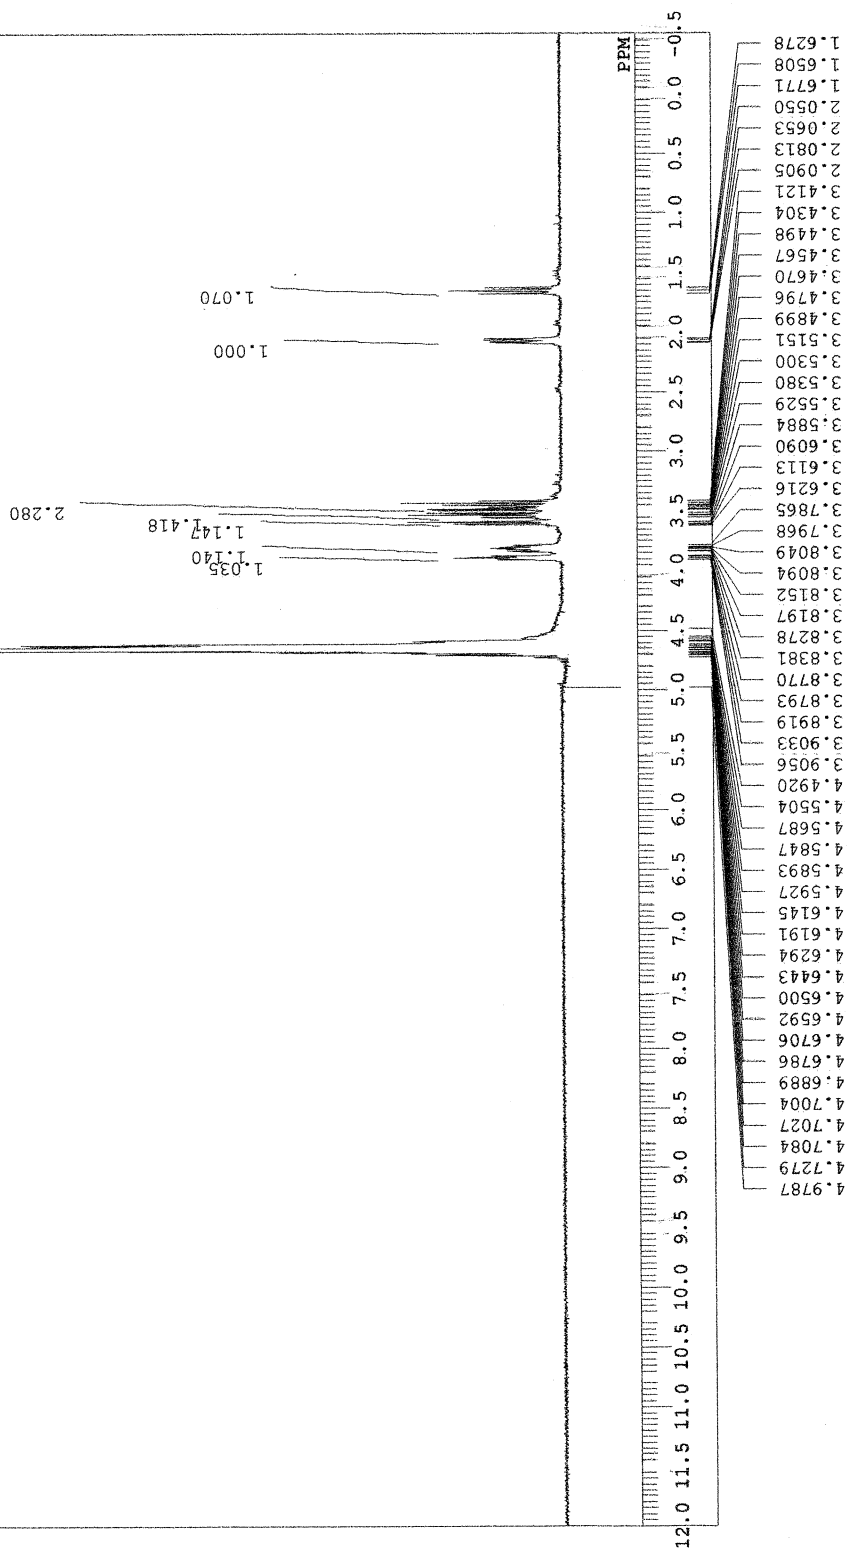



6d

wei lyxose acid carb\_copyl-1-2.jdf

COMNT 2015-08-20 23:16:12  
 DATIM 13C  
 OBNUC carbon.jpg  
 EXMOD 125.77 MHz  
 OFPRQ 7.87 KHz  
 OBSET 4.21 Hz  
 OFEIN 40960  
 POINT 49135.22 Hz  
 FREQU 2912  
 SCANS 0.0000 sec  
 ACQTM 2.0000 sec  
 PD 3.40 usec  
 PW1 1H  
 IRNUC 21.5 c  
 CTMP D2O  
 SLVNT 49.50 ppm  
 EXREF 0.12 Hz  
 BF 60  
 RGAIN

C:\Documents and Settings\user1\ffXfNfgfbv\Gousei\wei\propargylation\data collection\NATURE DATA\carb\wei lyxose acid carb\_copyl-1-2.jdf

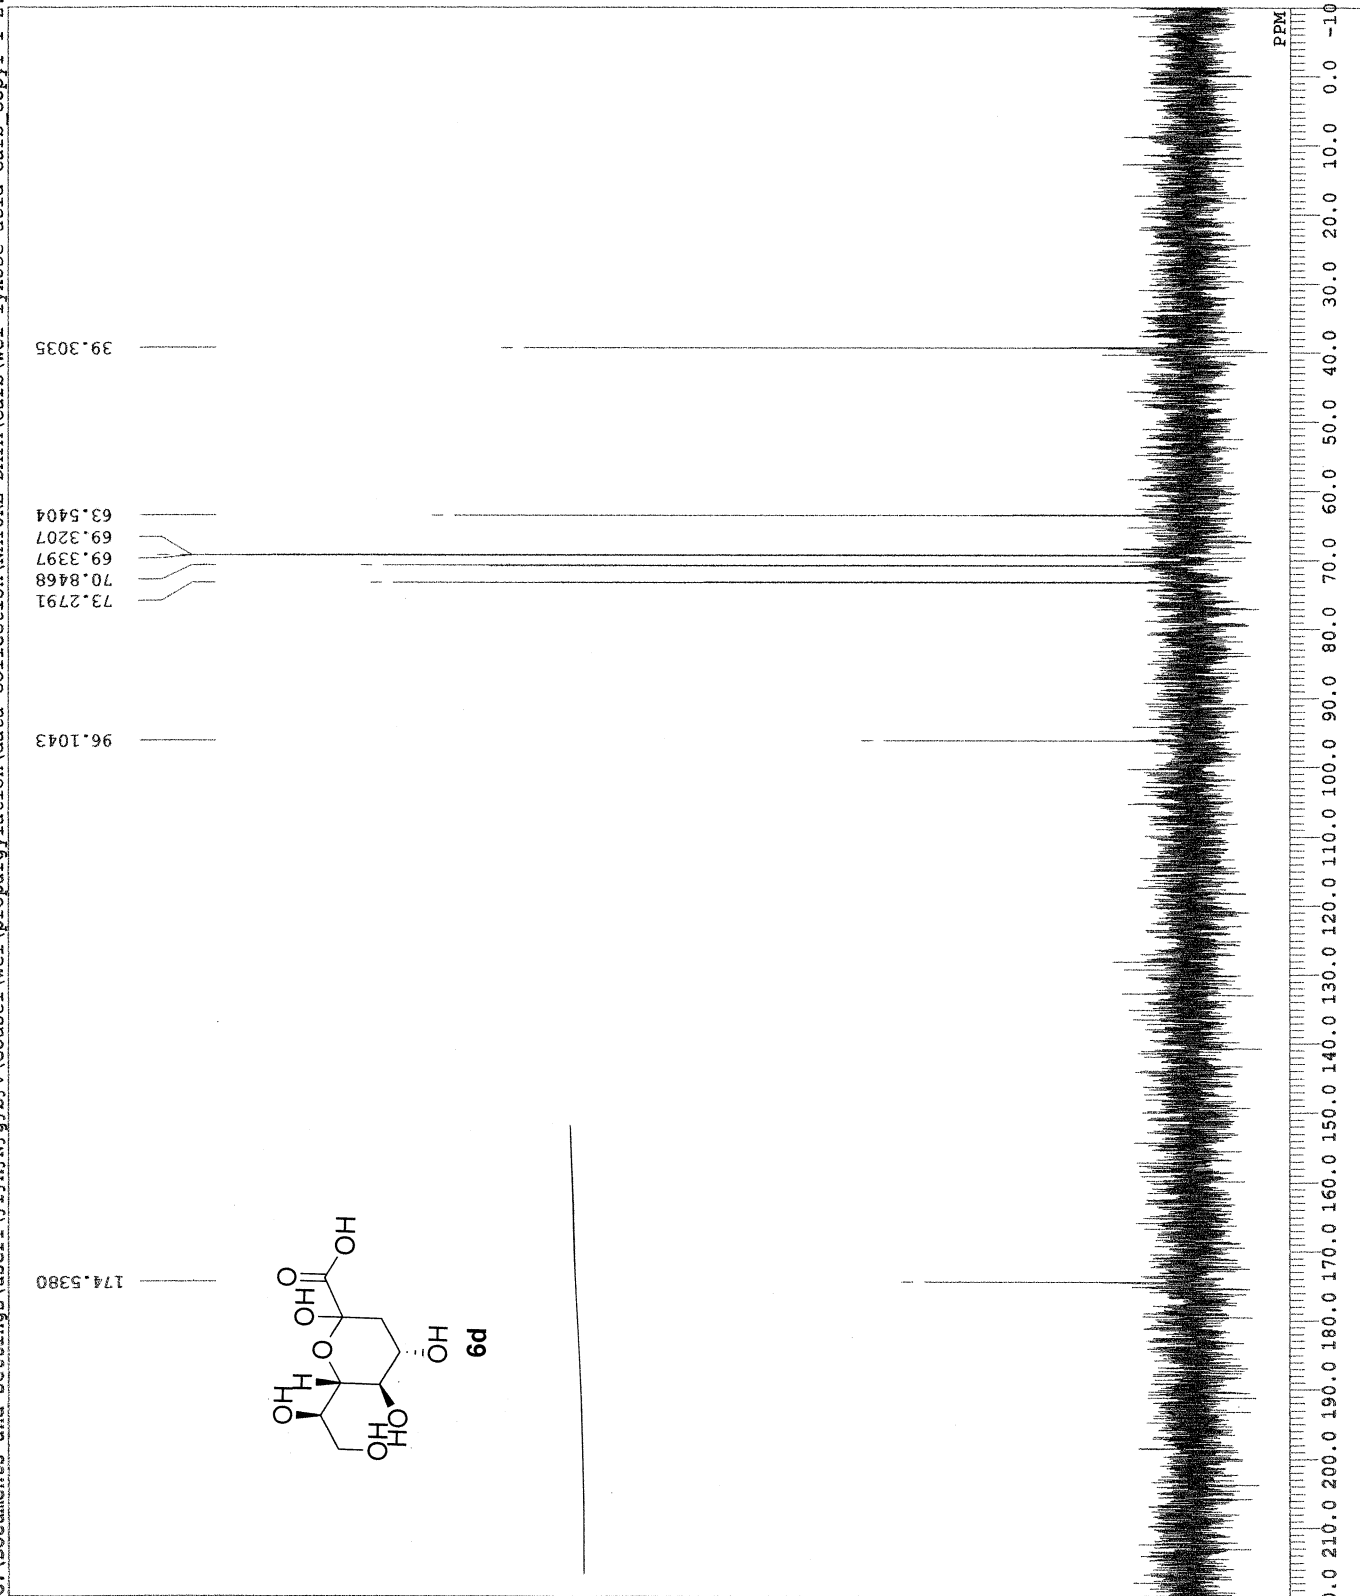

DFILE wei l-lactose acid-1-1.als  
 COMMT 23-07-2015 18:11:40  
 DATIM 1H  
 OBNUC proton.kxp  
 EXMOD 391.78 MHz  
 OBFRQ 8.51 KHz  
 OBSET 3.34 Hz  
 OBFIN 13107  
 POINT 5882.35 Hz  
 FREQU 18  
 SCANS 2.2282 sec  
 ACQTM 5.0000 sec  
 PD 4.99 usec  
 PW1 1H  
 IRNUC 21.8 c  
 CTEMP D2O  
 SLVNT 0.00 ppm  
 EXREF 0.12 Hz  
 BF 30  
 RGAIN

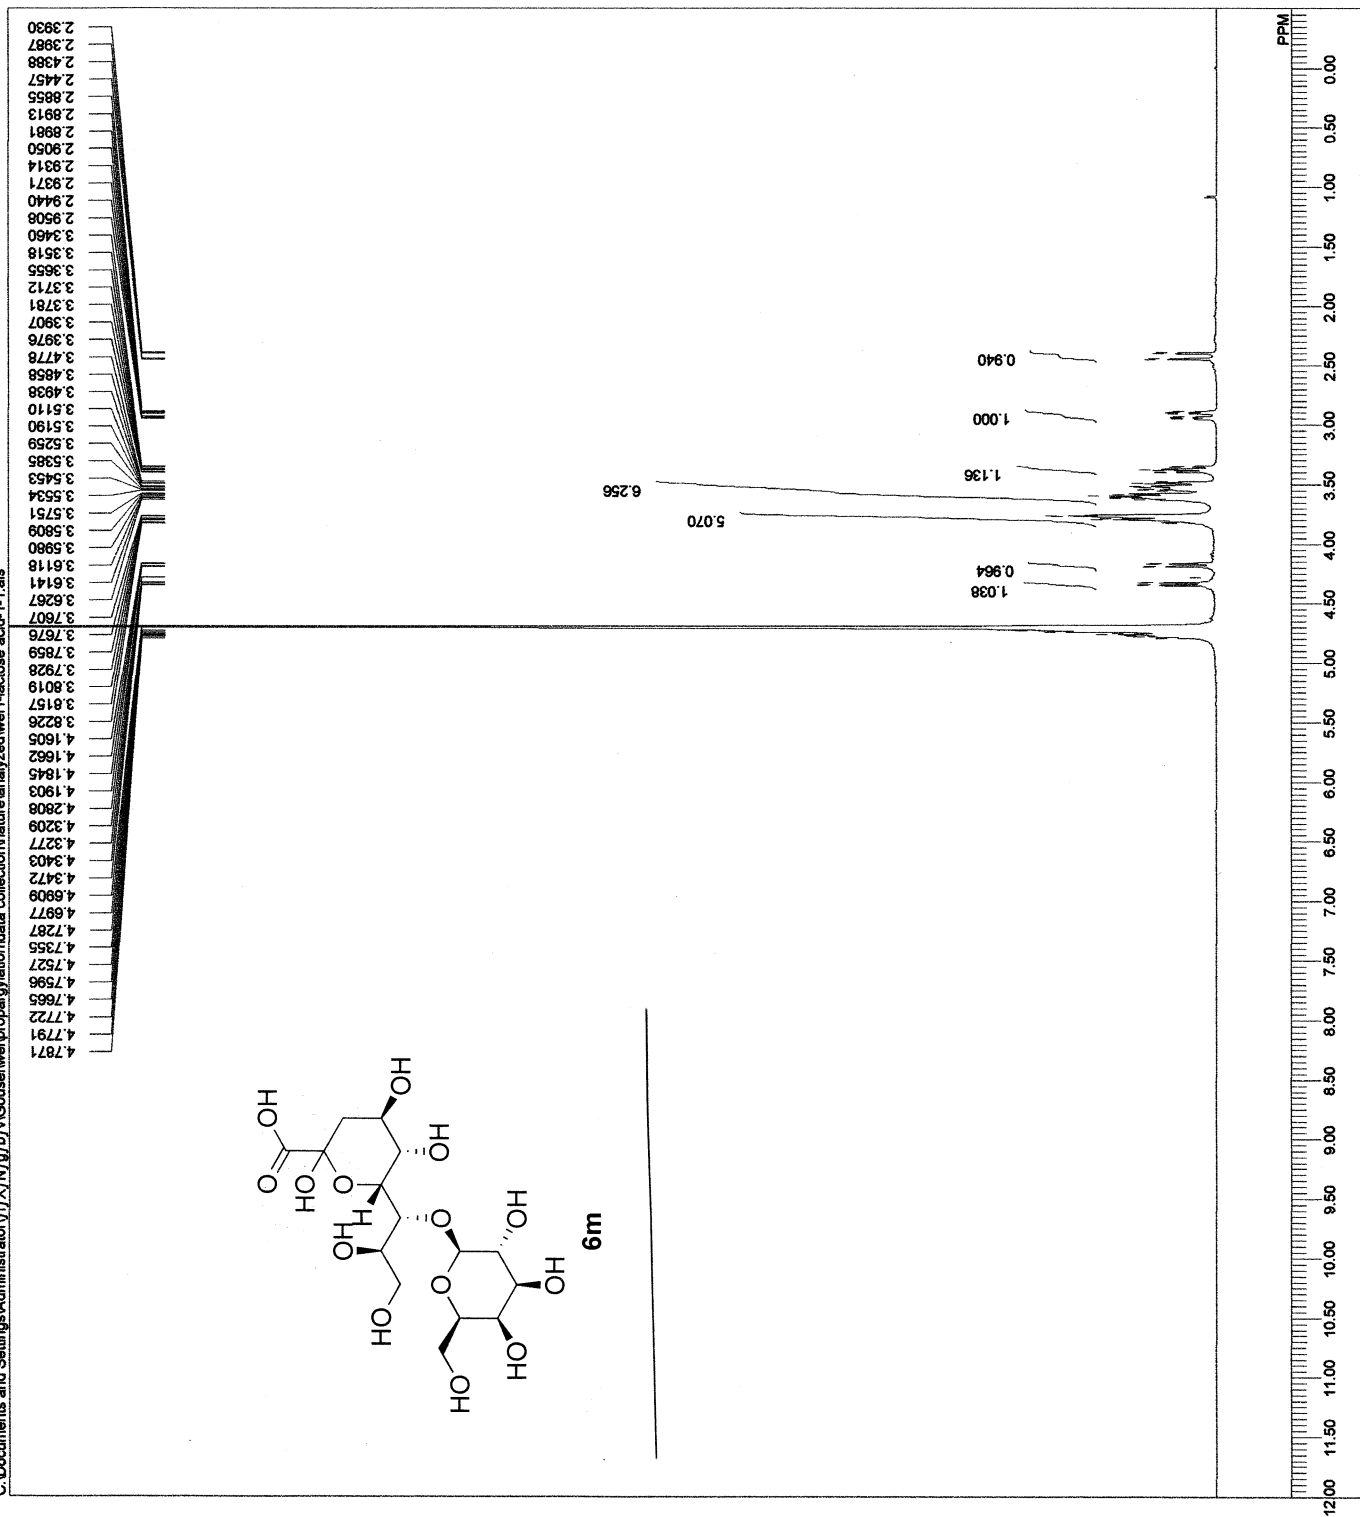

DFILE  
 COMNT  
 DATIM 23-07-2015 18:14:23  
 OBNUC 13C  
 EXMOD carbon.jxp  
 OBFRQ 96.52 MHz  
 OBSET 4.64 KHz  
 OBFIN 8.74 Hz  
 POINT 32767  
 FREQU 30788.18 Hz  
 SCANS 1053  
 ACQTM 1.0643 sec  
 PD 2.0000 sec  
 PW1 3.16 usec  
 IRNUC 1H 21.9 c  
 CTMP DZO  
 SLVNT  
 EXREF 48.50 ppm  
 BF 0.12 Hz  
 RGAIN 60

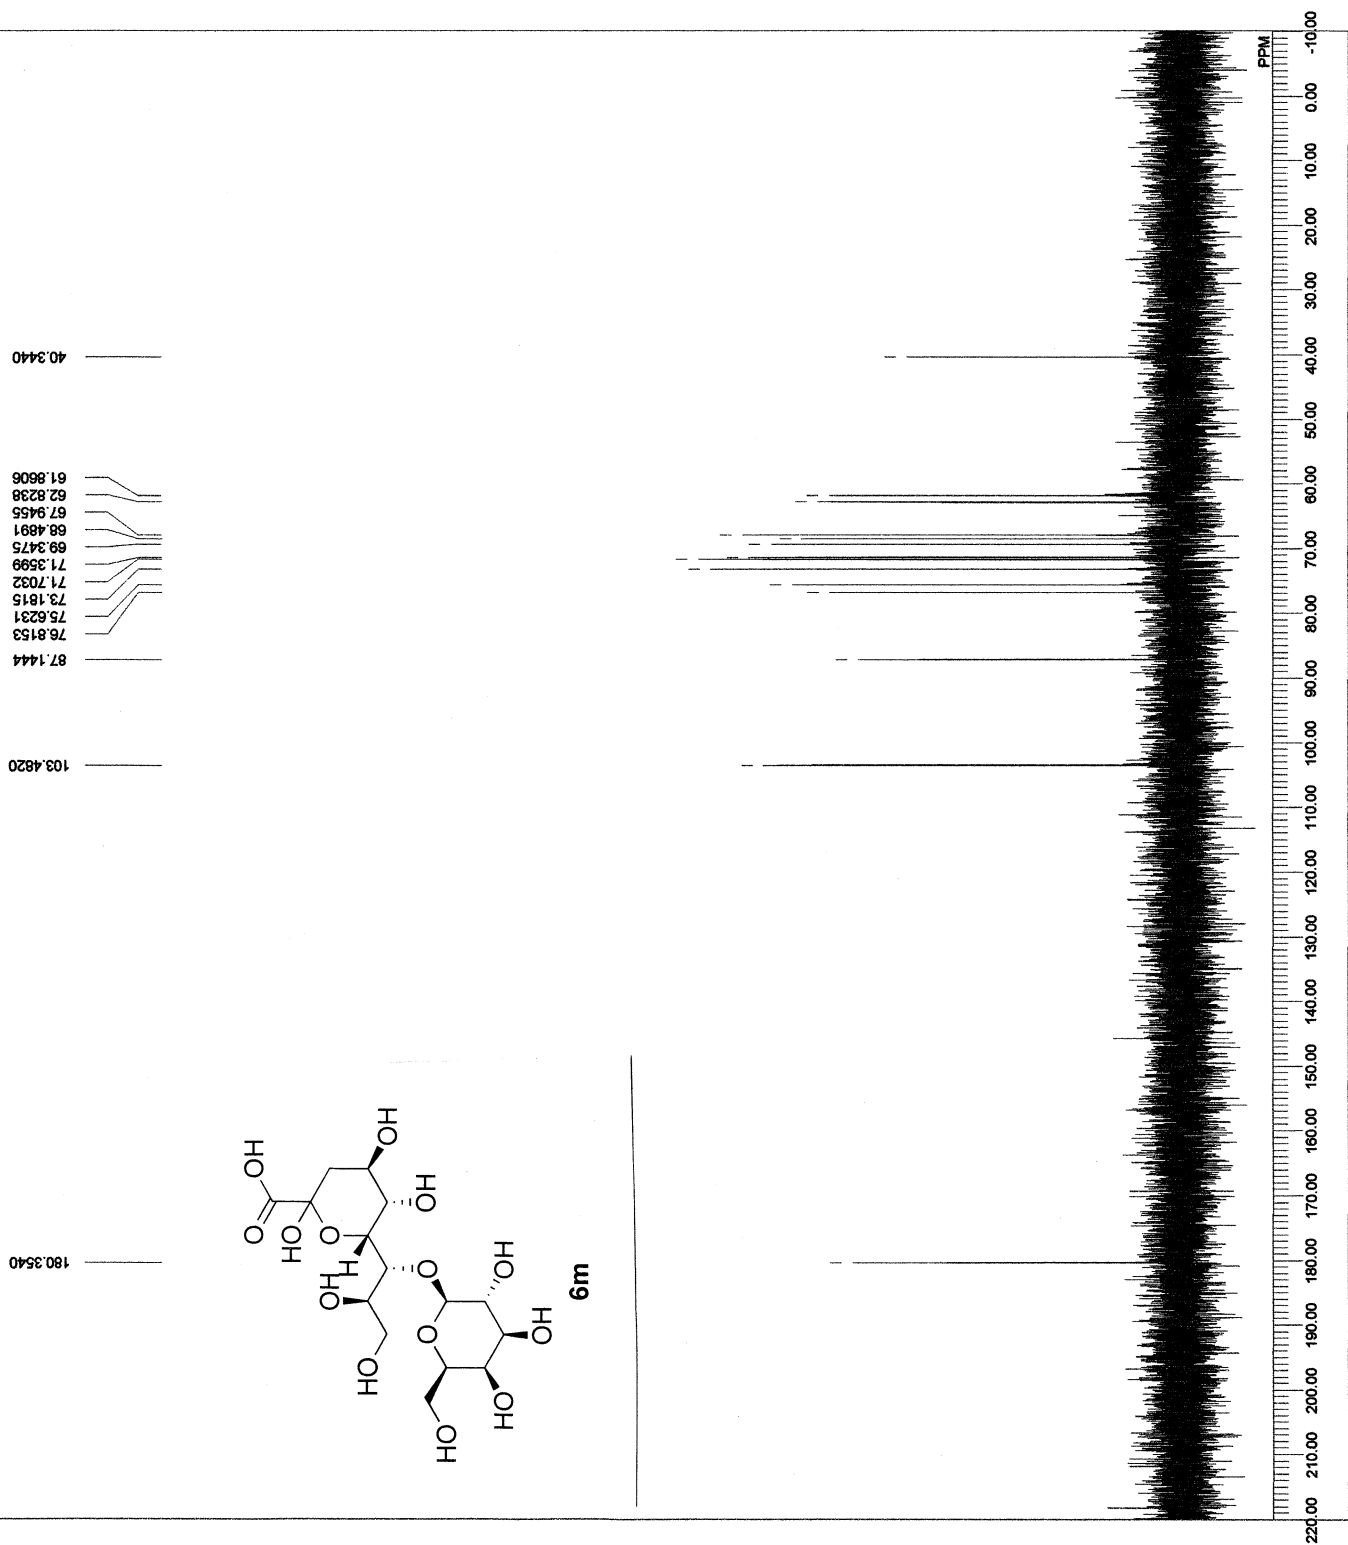

Supplement: Supplementary file 1 [file 3659082]
